1 **Arl2 Associates with Cdk5rap2 to Regulate Cortical Development**  
2 **via Microtubule Organization**

3 Dong-Liang Ma<sup>1\*</sup>, Kun-Yang Lin<sup>1</sup>, Suresh Divya<sup>1</sup>, Jiaen Lin<sup>1</sup>, Mahekta R. Gujar<sup>1</sup>, Htet Yamin  
4 Aung<sup>1</sup>, Ye Sing Tan<sup>1</sup>, Yang Gao<sup>1</sup>, Anselm S. Vincent<sup>1</sup>, Teng Chen<sup>2,3</sup>, Hongyan Wang\*<sup>1,4,5</sup>

5 <sup>1</sup> Program in Neuroscience and Behavioural Disorders, Duke-NUS Medical School, Singapore  
6 169857

7 <sup>2</sup> College of Forensic Medicine, Xi'an Jiaotong University Health Science Center, Xi'an,  
8 Shaanxi, PR China, 710061.

9 <sup>3</sup> The Key Laboratory of Health Ministry for Forensic Science, Xi'an Jiaotong University,  
10 Shaanxi, PR China, 710061.

11 <sup>4</sup> Department of Physiology, Yong Loo Lin School of Medicine, National University of  
12 Singapore, Singapore 117597

13 <sup>5</sup> Integrative Sciences and Engineering Programme, National University of Singapore, 28  
14 Medical Drive, Singapore 117456

15

16 Lead contact: Hongyan Wang

17 \* Correspondence: [hongyan.wang@duke-nus.edu.sg](mailto:hongyan.wang@duke-nus.edu.sg) and [dongliang.ma@duke-nus.edu.sg](mailto:dongliang.ma@duke-nus.edu.sg)

18

19

20 Keywords: Arl2, neural stem cells, cortical development, neurogenesis, microtubules,  
21 Cdk5rap2/Cep215

22

23

24 **Abstract**

25 ADP ribosylation factor-like GTPase 2 (Arl2) is crucial for controlling mitochondrial fusion  
26 and microtubule assembly in various organisms. Arl2 regulates the asymmetric division of  
27 neural stem cells in *Drosophila* via microtubule growth. However, the function of mammalian  
28 Arl2 during cortical development was unknown. Here, we demonstrate that mouse Arl2 plays  
29 a new role in corticogenesis via regulating microtubule growth, but not mitochondria functions.  
30 Arl2 knockdown leads to impaired proliferation of neural progenitor cells (NPCs) and neuronal  
31 migration. Arl2 knockdown in mouse NPCs significantly diminishes centrosomal microtubule  
32 growth and delocalization of centrosomal proteins Cdk5rap2 and  $\gamma$ -tubulin. Moreover, Arl2  
33 physically associates with Cdk5rap2 by *in silico* prediction using AlphaFold Multimer and *in*  
34 *vitro* binding assays. Remarkably, Cdk5rap2 overexpression significantly rescues the  
35 neurogenesis defects caused by Arl2 knockdown. Therefore, Arl2 plays an important role in  
36 mouse cortical development through microtubule growth via the centrosomal protein Cdk5rap2.

37

38

## 39 **Introduction**

40 Neural stem cells (NSCs) play a central role in the development of the mammalian brain.  
41 Cortical NSCs reside in the ventricular zone (VZ) and subventricular zone (SVZ), namely  
42 neuroepithelial cells and the apical radial glial cells, self-renew and proliferate to generate  
43 neurons that migrate to the cortical plate (CP) [1-8]. Both types of cells are collectively termed  
44 as neural stem and progenitor cells, hence referred to as neural progenitor cells (NPCs). NPCs  
45 divide either symmetrically or asymmetrically [1, 2]. Symmetric division of NPCs expands the  
46 stem cell pool during early neurogenesis [1, 2]. Subsequently, NPCs divide asymmetrically to  
47 generate intermediate progenitor cells that divide once to produce two neurons [1, 9]. The  
48 balance between the proliferation and differentiation of NPCs has a direct impact on neuron  
49 formation. Moreover, defects in NPC proliferation are associated with neurodevelopmental  
50 disorders [10-12].

51       Centrosomal proteins play crucial roles during mouse cortical development. The  
52 centrosome, composed of a pair of centrioles surrounded by pericentriolar material protein  
53 (PCM), is the major microtubule-organizing center (MTOC) that contributes to the formation  
54 of the mitotic spindle during cell division. A few centrosomal proteins including PCM1 and  
55 Cep120 play critical roles in brain development and variants in these two genes are associated  
56 with primary microcephaly [13-15]. CDK5 Regulatory Subunit Associated Protein 2  
57 (Cdk5rap2/Cep215) is an evolutionarily conserved PCM protein that plays a crucial role in  
58 centrosomal duplication and maturation as well as microtubule organization in various  
59 organisms. Cdk5rap2 is critical for proliferation and differentiation of neuronal progenitor cells  
60 during mouse cortical development [16, 17]. Mutations in Cdk5rap2 are associated with  
61 congenital diseases such as primary microcephaly and primordial dwarfism [18, 19].

62 Arl2 (ADP-ribosylation factor-like 2) is an evolutionarily conserved small GTPase that  
63 is crucial for the formation of microtubules and maintaining centrosome integrity [20, 21]. Arl2  
64 cycles between an inactive GDP-bound and an activated GTP-bound state and is a regulator of  
65 tubulin folding and microtubule biogenesis [9, 20-24]. Yeast orthologue of Arl2, together with  
66 TBCD and TBCE, forms a tubulin chaperone for microtubule biogenesis [25]. We previously  
67 showed that *Drosophila* Arl2 is essential for NSC polarity and microtubule growth [22]. Arl2  
68 also plays a role in mitochondrial dynamics and function [24]. Arl2 regulates mitochondrial  
69 fusion when it is in the intermembrane space [26]. Arl2 also interacts with mitochondrial outer  
70 membrane proteins Miro1 and Miro2 to modulate mitochondrial transport and distribution [27].  
71 Variants in human ARL2 and ARL2BP have been identified in eye disorders namely MRCS  
72 (microcornea, rod-cone dystrophy, cataract, and posterior staphyloma) syndrome and retinitis  
73 pigmentosa, respectively [28, 29].

74 Mammalian Arl2 is widely expressed in various tissues and is most abundant in the  
75 brain [30]. However, the role of mammalian Arl2 during brain development has not been  
76 established. In this study, we demonstrate a novel role for the mammalian Arl2 in cortical  
77 development. We show that Arl2 is required for the proliferation, migration and differentiation  
78 of mouse forebrain NPCs *in vitro* and *in vivo* by regulating centrosome assembly and  
79 microtubule growth in NPCs. Moreover, Arl2 co-localizes with Cdk5rap2 at the centrosomes  
80 and can physically associate with it. Finally, Arl2 functions upstream of Cdk5rap2 in regulating  
81 NPC proliferation and migration during mouse cortical development.

82

## 83 **RESULTS**

### 84 **Arl2 knockdown results in a reduction in mNPC proliferation and neuronal migration**

85 To examine the role of mouse Arl2 in cortical development, we silenced endogenous Arl2  
86 expression in the primary culture of mouse neural progenitor cells (mNPCs) isolated from E14  
87 mouse cortex *in vitro* (Supplementary Figure 1A) as well as in utero electroporated cells in  
88 mouse brain *in vivo* (Figure 1A) using short hairpin RNA (shRNA). We identified two  
89 independent shArl2-1 and shArl2-2 tagged with green fluorescent protein (GFP) which are  
90 capable of knocking down endogenous Arl2 expression. Upon Arl2 knock down (KD), Arl2  
91 protein detected by anti-Arl2 antibodies in the Western blot (WB) was reduced to 42.52%  
92 (shArl2-1) and 20.37% (shArl2-2), respectively, compared with the control. Since knockdown  
93 by shArl2-2 is more efficient (Supplementary Figure 1B-C), we used shArl2-2 for the  
94 subsequent phenotypic analysis.

95 To determine whether Arl2 KD affects the proliferation and differentiation of mNPCs  
96 during mouse cortical development, we silenced endogenous Arl2 expression in the primary  
97 culture of mNPCs *in vitro* by lentivirus (pPurGreen) infection in 48 h culture and pulse-labelled  
98 with EdU for 3 h before harvesting the cells. Remarkably, we observed a significant decrease  
99 in the proportion of EdU+ cells to 34.35% and Ki67+ cells to 36.98% in the shArl2 group as  
100 compared to the control group (46.03% and 60.09%, respectively) (Supplementary Figure 1D-  
101 F). Consistent with these observations, there was a significant reduction in cell proliferation  
102 upon Arl2 KD in mNPCs as compared to control in automated live-imaging analysis by  
103 Incucyte (Supplementary Figure 1G-H; Movie S1-2). Taken together, our data suggests that  
104 Arl2 is required for the proliferation of mNPCs *in vitro*.

105 To assess the impact of Arl2 knockdown (KD) on the proliferation, differentiation, and  
106 migration of mouse neural progenitor cells (mNPCs) during cortical development *in vivo*, we  
107 introduced Arl2 shRNA-2 via microinjection into the lateral ventricle of mouse embryos,  
108 followed by *in utero* electroporation (IUE) at embryonic day 13 (E13) (Figure 1A), and

109 examined cortical neurogenesis from E14 to E16. At E14, one day after IUE and following 6-  
110 hour pulse-labelling with EdU before sample collection, the majority of GFP-positive cells  
111 were located in the ventricular zone (VZ) and subventricular zone (SVZ), with the minority  
112 population of cells migrating into the intermediate zone (IZ) in both control and shArl2 group  
113 (Figure 1B). Interestingly, in the VZ and SVZ, we observed a substantial reduction in the  
114 proportion of EdU+/GFP+ double-labelled cells in the shArl2 group (40.66%) as compared to  
115 the control group (55.54%) (Figure 1C). This data strongly suggests a notable impairment in  
116 the proliferation of NSCs due to Arl2 KD *in vivo*. At E15, majority of control GFP-positive  
117 (GFP+) cells were located in the IZ (49.99%) or had migrated into the cortical plate (CP)  
118 (12.68%), with a few GFP+ remaining in the VZ (19.92%) and SVZ (18.76%) (Figure 1D, E).  
119 In contrast, Arl2 knockdown resulted in significantly more cells remaining in the VZ (30.94%),  
120 SVZ (27.64%), and IZ (38.00%), with fewer cells at the CP (3.42%) as compared to the control  
121 group (Figure 1D, E). At E16, three days after IUE, more GFP+ cells were located in the IZ  
122 (52.82%) and CP (23.07%), while the rest of the cells persisted in the VZ (10.17%) and SVZ  
123 (13.94%) in the control group (Figure 1F, G). Remarkably, Arl2 knockdown caused a notable  
124 retention of cells in the VZ (21.42%), SVZ (18.82%), and IZ (48.00%), accompanied by much  
125 fewer cells at the CP (11.75%) (Figure 1F, G), suggesting a defect in neuronal migration.

126 In summary, our findings collectively highlight the critical role of Arl2 in the  
127 proliferation of NSCs and the migration of neuronal cells during cortical development.

### 128 **Overexpression mArl2 or hArl2 results in an increase in neuronal migration**

129 Since the Arl2 KD led to decreased proliferation and migration of neuronal cells, we wondered  
130 whether overexpressing Arl2 had any effect on cortical development. We overexpressed both  
131 the human and mouse forms of wildtype Arl2 (FUtdTW-Arl2<sup>WT</sup>) driven by UbC promotor via  
132 microinjection into the lateral ventricle of mouse embryos, followed by IUE at embryonic day

133 13 (E13) (Figure 2A and C). Interestingly, at E16, 3 days after IUE, there was a significant  
134 increase in neuronal cell migration (tdTomato-positive (Td+) cells) to the CP in human  $Arl2^{WT}$   
135 ( $hArl2^{WT}$ ) (VZ = 11.13%, SVZ = 18.21%, IZ = 40.25%, CP = 30.41%) as compared to control  
136 (VZ = 13.23%, SVZ = 19.47%, IZ = 45.92%, CP = 21.39%). Likewise, overexpression of  
137 mouse  $Arl2^{WT}$  ( $mArl2^{WT}$ ) also resulted in a significant increase in neuronal migration (Figure  
138 2A and C, VZ = 13.92%, SVZ = 20.69%, IZ = 36.09%, CP = 29.30%) as compared to control,  
139 suggesting human and mouse forms  $Arl2$  have conserved functions in neuronal migration  
140 (Figure 2A and C). Since human and mouse  $Arl2$  show 96% homology and our overexpression  
141 results show similar phenotypes for both species, we used the human  $Arl2$  for all subsequent  
142 overexpression experiments unless otherwise stated.

### 143 **Overexpression of mutant forms of ARL2 resulted in a defect in neuronal migration**

144 To further elucidate the role of  $Arl2$  in neurogenesis, we tested the effect of overexpression of  
145 wildtype  $Arl2$  ( $Arl2^{WT}$ ) as well as two mutant forms of  $Arl2$ , namely, the dominant-negative  
146 form ( $Arl2^{T30N}$ ) and the dominant-active form ( $Arl2^{Q70L}$ ). Expression of these constructs tagged  
147 with Tdtomato (FUtdTW), were driven by the Ubiquitin C (UbC) promotor, in the primary  
148 culture of mNPCs *in vitro* by lentivirus (FUtdTW) infection in 48 h culture and pulse-labelled  
149 with EdU for 3 h before harvesting the cells. Interestingly, there was a significant increase in  
150 the proportion of EdU+ cells in  $Arl2^{WT}$  (79.01%) as compared to control (59.06%)  
151 (Supplementary Figure 2A and B). In contrast, we observed a significant decrease in the  
152 proportion of EdU+ cells in  $Arl2^{T30N}$  and  $Arl2^{Q70L}$  (36.4% and 27.4%, respectively) as  
153 compared to the control group (59.06%) (Supplementary Figure 2A and B). Furthermore,  
154 overexpression of  $Arl2^{T30N}$  and  $Arl2^{Q70L}$  but not  $Arl2^{WT}$  caused significant cell death as seen  
155 by the increase in caspase-3 staining in mNPCs *in vitro* as compared to control (Supplementary  
156 Figure 2A and C; Control = 22.18%;  $Arl2^{WT}$  = 30.89%;  $Arl2^{T30N}$  = 86.76% and  $Arl2^{Q70L}$  =

157 71.86%). Taken together, our data suggests that Arl2 is required for the proliferation of neural  
158 stem cells *in vitro*.

159 To assess the impact of Arl2 overexpression on the proliferation, differentiation, and  
160 migration of mouse neural progenitor cells (mNPCs) during *in vivo* cortical development, we  
161 introduced Arl2 and two mutant forms via microinjection into the lateral ventricle of mouse  
162 embryos, followed by *in utero* electroporation (IUE) at embryonic day 13 (E13). Remarkably,  
163 at E16, overexpression of both mutant forms displayed a significant reduction in Td+ cells  
164 migrating to the cortical plate (Figure 2B and D; Arl2<sup>T30N</sup>, VZ = 15.23%, SVZ = 19.34%, IZ =  
165 65.43%, CP = 0.00% and Arl2<sup>Q70L</sup>, VZ = 15.68%, SVZ = 20.80%, IZ = 63.53%, CP = 0.00%)  
166 as compared to control (Figure 2B and D; VZ = 14.23%, SVZ = 20.15%, IZ = 39.63%, CP =  
167 25.99%). Our results suggest that overexpression of both Arl2<sup>T30N</sup> and Arl2<sup>Q70L</sup> results in a  
168 similar phenotype in neuronal migration as Arl2 KD.

169 Surprisingly, we find that overexpression of Arl2<sup>T30N</sup> and Arl2<sup>Q70L</sup> but not Arl2<sup>WT</sup> at  
170 E15, two days after IUE, showed a significant increase in the proportion of phospho-histone  
171 H3-positive (PH3+) cells in the VZ as compared to control (Supplementary Figure 2D-E;  
172 control 3.31%, Arl2<sup>WT</sup> 2.94%, Arl2<sup>T30N</sup> 8.33%, Arl2<sup>Q70L</sup> 9.43%). This increase in PH3+ cells  
173 may be due to mitotic defects or over proliferation of radial glial cells. To distinguish these two  
174 possibilities, we examined the spindle poles marked by gamma-tubulin in these cells to assess  
175 their cell divisions. Indeed, overexpression of Arl2<sup>T30N</sup> and Arl2<sup>Q70L</sup> caused a significant  
176 increase in mitotic defects (cell cycle arrest), with defective spindle formation as compared to  
177 control and Arl2<sup>WT</sup> (Supplementary Figure 3A). Furthermore, similar to our *in vitro* results,  
178 there was a significant increase in the proportion of caspase-3+ cells in the IZ in Arl2<sup>Q70L</sup>  
179 (38.52%) as compared to control (5.92%; Supplementary Figure 3B and C). These data suggest  
180 that the migration and proliferation defects observed in Arl2 mutants are possibly due to mitotic  
181 defects, eventually leading to cell death.



182 To further test whether Arl2 affects neuronal migration, we examined TBR2, a  
183 transcription factor that marks the transition from radial glial cells to intermediate progenitor  
184 cells (Figure 2E-G). At E18, 5 days after IUE, we find that majority of the TBR2+Td+ cells  
185 have already migrated to the CP in control mouse brains, with few TBR2+Td+ cells still present  
186 in the IZ (Figure 2E-G). Interestingly, in Arl2<sup>Q70L</sup> mutants a large population of TBR2+Td+  
187 cells still remained in the IZ (Figure 2F, 42.11 ± 3.45%) with few to no cells migrating to the  
188 CP as compared to control (7.56 ± 0.84%). Similarly, a vast majority of neuronal (TBR1+)  
189 were still retained in the IZ in Arl2<sup>Q70L</sup> mutant mouse brains (Figure 2G; 42.91 ± 2.48%) as  
190 compared to control (8.17 ± 2.59%). In contrast, the expression of NeuroD2, a neuronal marker  
191 found in immature neurons, is significantly increased in Arl2<sup>WT</sup> (30.77 ± 2.93%) but  
192 dramatically reduced in Arl2<sup>Q70L</sup> (6.75 ± 2.69%) 3 days after IUE as compared to control (20.57  
193 ± 1.36%) (Supplementary Figure 3D-E).

194 Taken together, Arl2 dysfunction resulted in a defective migration of neuronal cells.

### 195 **Loss of Arl2 results in a significant reduction of centrosomal microtubule growth in** 196 **mNPCs *in vitro***

197 Arl2 regulates centrosomal microtubule nucleation and growth in various cell types including  
198 *Drosophila* NSCs [21, 22, 24]. We sought to investigate whether mouse Arl2 plays a conserved  
199 role in microtubule growth in mNPCs. To this end we performed microtubule regrowth assay,  
200 where in, mNPCs were synchronized in the S phase using thymidine and microtubules were  
201 depolymerized by nocodazole treatment in these cells. Microtubule regrowth labelled by  $\alpha$ -  
202 tubulin was assessed in a time-course experiment following wash out of nocodazole (Figure  
203 3A). Before nocodazole treatment, shArl2 cells showed a slight but not significant reduction  
204 of microtubule intensity (97.9 A.U.) as compared to control (Figure 3B-C, 122.70 A.U.).  
205 Microtubules were efficiently depolymerized in both control and Arl2 KD cells (t = 0), as only

206 weak residual microtubules labelled by  $\alpha$ -tubulin were seen at the centrosome following  
207 nocodazole treatment (Figure 3B-C, shCtrl: 30.21 A.U. vs shArl2: 31.63 A.U.). In control,  
208 robust microtubules were observed around the centrosome, at various time points following  
209 recovery (Fig 3B-C). In contrast, Arl2 KD in mNPCs reassembled less microtubule mass after  
210 5 mins recovery (Fig. 3B-C; shCtrl: 68.27 A.U. vs shArl2: 39.47 A.U.), and after 10 min (Fig.  
211 3B-C; shCtrl: 95.96 A.U. vs shArl2: 67.50 A.U.). Interestingly, even after 30 minutes of  
212 recovery, Arl2 KD cells were still unable to recover their microtubule mass as compared to  
213 control (Fig. 3B-C; shCtrl: 110.87 A.U. vs shArl2: 71.63 A.U.). These results suggest that Arl2  
214 promotes microtubule growth in mNPCs.

215 To further determine the role of Arl2 in microtubule growth of mNPCs, we performed  
216 live imaging to track the growing ends of microtubules by using the plus-end microtubule  
217 binding protein EB3, which is enriched in the nervous system [31]. Remarkably, knock down  
218 Arl2 (shArl2 marked by GFP) in mNPCs expressing EB3-tdTomato resulted in a significant  
219 reduction in velocity of both anterograde (0.07  $\mu\text{m}/\text{sec}$ ) and retrograde EB3 comets (0.05  
220  $\mu\text{m}/\text{sec}$ ) as compared to control (Figure 3D-G; Movie S3; anterograde, 0.09  $\mu\text{m}/\text{sec}$ ; retrograde,  
221 0.07  $\mu\text{m}/\text{sec}$ ). Furthermore, the total density of EB3 comets was notably reduced as compared  
222 to the control (Figure 3D, E and H; Movie S3; shCtrl = 0.30 No./ $\mu\text{m}^2$ ; shArl2 = 0.24 No./ $\mu\text{m}^2$ ).  
223 Taken together, our data suggests that Arl2 is critical for microtubule growth in mNPCs.

224

### 225 **Loss of Arl2 led to a shift of symmetric division to asymmetric division of mNPCs and** 226 **alters the mNPC differentiation**

227 Next, we investigated whether the defects in mNPC proliferation and differentiation upon Arl2  
228 KD was caused by an imbalance between the symmetric and asymmetric division of NPCs.  
229 Control and Arl2 shRNA were introduced via microinjection into the lateral ventricle of mouse  
230 embryos, followed by IUE at embryonic day 13 (E13). At E14, one day after IUE, wild-type

231 radial glial cells in the VZ can undergo both symmetric and asymmetric divisions, depending  
232 on the plane of division (Figure 4A-C). Interestingly, loss of Arl2 causes a significantly larger  
233 population of radial glial cells to divide with an oblique orientation ( $30^{\circ}$ - $60^{\circ}$ ) at the cleavage  
234 furrow (31.36%) and fewer radial glial cells (46.94%) divide in the vertical division plane ( $60^{\circ}$ -  
235  $90^{\circ}$ ) as compared to control ( $30^{\circ}$ - $60^{\circ}$  = 21.08% and  $60^{\circ}$ - $90^{\circ}$  = 56.15%; Figure 4A-C). There  
236 was no obvious change the population of radial glial cells that divide in the horizontal division  
237 plane ( $0^{\circ}$ - $30^{\circ}$ ; shCtrl = 22.78% vs shArl2 = 21.70%). Thus, Arl2-depleted NPCs divide  
238 asymmetrically more frequently than symmetrically as compared to control, which may  
239 account for the defects in NPC proliferation and differentiation observed upon loss of Arl2.  
240 This data suggests that Arl2 regulates radial glia proliferation possibly by regulating proper  
241 centrosomal localization, mitotic spindle formation and cell cycle progression.

242 To investigate whether Arl2 regulates neuronal differentiation of mNPCs, we examined  
243 Doublecortin (DCX), a neuronal marker that is expressed in neuronal precursor cells and  
244 immature neurons. Interestingly, Arl2 KD in mNPCs led to a significant reduction in the  
245 population of DCX-positive cells (31.48%) as compare to control (40.63%; Figure 4D-E).  
246 Furthermore, the average neurite length (53.60  $\mu$ m) as well as average neurite number (3.27)  
247 were significantly reduced in Arl2 KD as compared to control (neurite length = 88.88  $\mu$ m,  
248 neurite number = 5.22; Figure 4D, F-G), suggesting that loss of Arl2 affects neuronal  
249 differentiation of mNPCs.

250 To further understand how Arl2 affects mNPC proliferation, we performed live imaging  
251 of mNPCs *in vitro* using the Viafluor-488 live cell microtubule staining kit (Biotium, #70062).  
252 In control mNPCs the average time taken for a single mitotic cycle was 1.10 hours (Figure 4H-  
253 I; Movie S4). Interestingly, mNPCs expressing Arl2<sup>T30N</sup> but not Arl2<sup>Q70L</sup> or Arl2-WT caused  
254 a significant increase in the mitotic duration as compared to the control (Figure 4H-I; Movie

255 S4; average time,  $\text{Arl2}^{\text{T30N}} = 5.48$ ,  $\text{Arl2}^{\text{Q70L}} = 1.17$ ,  $\text{Arl2}^{\text{WT}} = 1.09$  hours), suggesting an  
256 additional defect in the cell cycle progression caused by this mutant form.

### 257 **Arl2 regulates the neuritogenesis of mouse primary neurons**

258 To determine whether neuronal migration defects caused by Arl2 dysfunction is due to  
259 impaired neuritogenesis, we examined the effect of  $\text{Arl2}^{\text{T30N}}$  and  $\text{Arl2}^{\text{Q71L}}$  in mouse primary  
260 neurons *in vitro*. Interestingly, overexpression of  $\text{Arl2}^{\text{T30N}}$  and  $\text{Arl2}^{\text{Q71L}}$  dramatically affected  
261 neuronal morphology, as fewer and shorter neurites were observed in these neurons as  
262 compared to control (Supplementary Figure 4A). The total intersection number as measured  
263 by Scholl's analysis was significantly reduced in  $\text{Arl2}^{\text{Q71L}}$  ( $11 \pm 1.80$ ) and  $\text{Arl2}^{\text{T30N}}$  ( $8.83 \pm$   
264  $1.04$ ) as compared to control ( $38 \pm 4.58$ ; Supplementary Figure 4A-C). These data suggest that  
265 neuronal migration defects caused by Arl2 dysfunction is possibly due to its role in regulating  
266 neurite outgrowth.

### 267 **Mitochondria defect is not the major cause of neurogenesis deficit observed in Arl2** 268 **dysfunction**

269 Given the importance of Arl2 in regulating both microtubule growth and mitochondrial  
270 functions [21, 30] we sought to pinpoint the mechanism underlying the role of Arl2 during  
271 neurogenesis. To this end, we generated the Lys71 to Arg71 ( $\text{Arl2}^{\text{K71R}}$ ) mutation in mouse Arl2  
272 which is known to cause mitochondrial fragmentation and immobility without disruption in  
273 microtubule assembly [32]. As expected,  $\text{Arl2}^{\text{K71R}}$  overexpression showed fragmented  
274 mitochondria with shortened mitochondrial length ( $2.41 \pm 0.99 \mu\text{m}$ ) as compared to control  
275 ( $5.53 \pm 3.78 \mu\text{m}$ ; Supplementary Figure 4D-E) in mouse NPCs *in vitro*. Interestingly, at day 3  
276 after IUE during *in vivo* cortical development, overexpression of mouse  $\text{Arl2}^{\text{K71R}}$  mutant,  
277 resulted in a significant increase in the number of Td+ cells migrating to the CP (VZ = 11.01%,  
278 SVZ = 17.18%, IZ = 38.89%, CP = 32.92%) as compared to control (VZ = 13.23%, SVZ =

279 19.47%, IZ = 45.92%, CP = 21.39%; Figure 2A and C), which mimicked the effect of  
280 overexpression of the wild-type Arl2 on cortical development (Figure 2).

281 Consistent with previous reported role of Arl2 in mitochondria fusion [26], Arl2<sup>Q70L</sup>  
282 overexpression in mNPCs caused a dramatic decrease in the number of cells with tubular  
283 mitochondria, indicating an increase in mitochondria fusion, while Arl2<sup>T30N</sup> overexpression  
284 resulted in a severe mitochondrial fragmentation as compared to the control or Arl2<sup>WT</sup>  
285 overexpression (Supplementary Figure 5A and B; Movie S5). Furthermore, neither shArl2 KD  
286 nor overexpression of Arl2, showed any change in mitochondrial morphology in mouse brains  
287 4 days after IUE as compared to control (Supplementary Figure 5C). Taken together,  
288 mitochondrial defects were not the primary cause for migration deficits observed in Arl2  
289 dysfunction.

### 290 **Overexpression of Arl2 mutant forms leads to defects in microtubule growth in mNPCs** 291 *in vitro*

292 Next, we performed microtubule regrowth assay for mNPCs overexpressing Arl2<sup>WT</sup>, Arl2<sup>Q70L</sup>  
293 and Arl2<sup>T30N</sup>. Both control and Arl2<sup>WT</sup> cells treated with nocodazole (t = 0s) showed weak  
294 residual microtubules at the centrosome, suggesting an efficient microtubule depolymerization  
295 (Figure 5A-B, control: 30.21 ± 9.20; Arl2<sup>WT</sup>: 47.30 ± 8.64). Remarkably, after 5 minutes of  
296 recovery Arl2<sup>WT</sup> mNPCs displayed more abundant microtubule density than control (Figure  
297 5A-B, control: 61.40 ± 18.00 A.U.; Arl2<sup>WT</sup>: 76.31 ± 24.34 A.U.). Even after 30 minutes of  
298 recovery, Arl2<sup>WT</sup> mNPCs still showed significantly higher microtubule density as compared to  
299 control (Figure 5A-B, control: 96.65 ± 19.09 A.U.; Arl2<sup>WT</sup>: 110.74 ± 17.96 A.U.), suggesting  
300 that overexpression of Arl2<sup>WT</sup> likely leads to overgrowth of microtubules in mNPCs. Similarly,  
301 overexpression of Arl2<sup>K71R</sup> caused a significant increase in overall microtubule density, even  
302 after 30 minutes of recovery (0 min = 62.56 ± 15.69 A.U., 5 min = 90.77 ± 14.18 A.U., 10 min

303 =  $120.69 \pm 19.26$  A.U., and 30 min =  $115.93 \pm 20.06$  A.U.), as compared to control recovery  
304 ( $33.82 \pm 10.65$  A.U., 5 min =  $63.64 \pm 15.80$  A.U., 10 min =  $79.52 \pm 14.88$  A.U., and 30 min =  
305  $81.37 \pm 14.90$  A.U.; Supplementary Figure 4F), suggesting that Arl2<sup>K71R</sup> behaves as the Arl2  
306 wild-type form. In contrast, overexpression of Arl2<sup>Q70L</sup> and Arl2<sup>T30N</sup> in mNPCs reassembled  
307 significantly lesser microtubule mass, at various time points following recovery as compared  
308 to control (Fig 5A-B; Arl2<sup>T30N</sup>, Untreated =  $73.65 \pm 7.14$  A.U., 0 min =  $40.34 \pm 5.38$  A.U., 5  
309 min =  $43.97 \pm 13.29$  A.U., 10 min =  $31.33 \pm 9.64$  A.U., and 30 min =  $40.75 \pm 13.64$  A.U.;  
310 Arl2<sup>Q70L</sup>, Untreated =  $79.76 \pm 13.13$  A.U., 0 min =  $26.45 \pm 10.44$  A.U., 5 min =  $52.94 \pm 21.58$   
311 A.U., 10 min =  $43.20 \pm 7.83$  A.U., and 30 min =  $65.82 \pm 14.84$  A.U.). These results further  
312 support that Arl2 promotes microtubule growth in mNPCs.

313 To further analyse the effect of Arl2 on microtubule growth, we performed live imaging  
314 in mNPCs overexpressing Arl2<sup>WT</sup>, Arl2<sup>Q70L</sup> or Arl2<sup>T30N</sup>. Remarkably, overexpression of  
315 Arl2<sup>WT</sup> showed a significant increase in the intensity of microtubules as compared to control  
316 (Supplementary Figure 5A). In contrast, both Arl2<sup>Q70L</sup> and Arl2<sup>T30N</sup> showed a significant  
317 reduction in the intensity of microtubules as compared to control (Supplementary Figure 5A).

318 To further validate the role of Arl2 in microtubule growth, we performed live imaging of EB3-  
319 GFP comets in Arl2<sup>WT</sup>, Arl2<sup>Q70L</sup> and Arl2<sup>T30N</sup> mNPCs. Similar to Arl2 KD, overexpression of  
320 Arl2<sup>Q70L</sup> and Arl2<sup>T30N</sup> resulted in a significant reduction in velocity in anterograde (Arl2<sup>T30N</sup>,  
321  $0.057 \pm 0.022$   $\mu\text{m}/\text{sec}$ ; Arl2<sup>Q70L</sup>,  $0.067 \pm 0.028$   $\mu\text{m}/\text{sec}$ ) and retrograde EB3 comets (Arl2<sup>T30N</sup>,  
322  $0.044 \pm 0.021$   $\mu\text{m}/\text{sec}$  and Arl2<sup>Q70L</sup>,  $0.048 \pm 0.021$   $\mu\text{m}/\text{sec}$ ) as compared to control (Figure 5C-  
323 F; Movie S6; anterograde, ( $0.074 \pm 0.034$   $\mu\text{m}/\text{sec}$ ), retrograde, ( $0.058 \pm 0.031$   $\mu\text{m}/\text{sec}$ ). The  
324 total density of EB3 comets appeared to be normal by overexpression of Arl2<sup>WT</sup>, Arl2<sup>Q70L</sup> or  
325 Arl2<sup>T30N</sup> (Figure 5C-D, G; Movie S6). Furthermore, overexpression of Arl2<sup>WT</sup> showed no  
326 obvious change in movements of EB3-GFP comets (Figure 5D-G), likely due to its weaker

327 effects than overexpression Arl2 mutant forms. Taken together, these observations indicate that  
328 Arl2 regulates microtubule growth in mNPCs.

### 329 **Arl2 localizes to the PCM of the centrosomes and facilitates $\gamma$ -tubulin localization at the** 330 **centrosomes in mNPCs**

331 Arl2 localizes to the centrosomes in different cell types including HEK and CHO cells and  
332 presumably localizes to PCM [20]. To determine whether Arl2 localizes to the PCM in  
333 HEK293 cells, we examined the ultrastructure of Arl2 (Arl2-HA) and Cdk5rap2 (Cdk5rap2-  
334 Myc), a centrosomal protein which is involved in microtubule organization [33], using super  
335 resolution microscopy (Figure 6A). Remarkably, Arl2 and Cdk5rap2 formed ring-like  
336 structures that co-localized with one another at the centrosome co-labelled by  $\gamma$ -tubulin in  
337 interphase and metaphase cells (Figure 6A). This observation suggests that Arl2 indeed  
338 localizes to the PCM. Furthermore, knocking down of Arl2 resulted in a significant decrease  
339 in  $\gamma$ -tubulin intensity at the centrosomes in metaphase of mNPCs (Figure 6B, D;  $68.59 \pm 9.31$   
340 A.U.) and interphase of mNPCs (supplementary Figure 6C, E;  $52.83 \pm 10.22$  A.U.) as  
341 compared to control (metaphase:  $114.9 \pm 24.88$  A.U., interphase:  $80.47 \pm 23.81$  A.U.,  
342 respectively). These data suggest that Arl2 is a centrosomal protein required for centrosomal  
343 assembly in mNPCs.

### 344 **Arl2 interacts with the centrosomal protein Cdk5rap2**

345 Next, we explored whether Arl2 and Cdk5rap2 can interact with each other. Alpha-fold  
346 multimer is emerging as a powerful and accurate approach for *in silico* prediction of protein-  
347 protein interactions based on deep learning method [34-36]. Using Alpha-fold multimer,  
348 Tubulin folding cofactor D (TBCD), a known strong interactor of Arl2, had an ipTM score of  
349 0.89, indicating the reliability of this approach. We found that Cdk5rap2 had an ipTM score of  
350 0.57 suggesting that Cdk5rap2 is a strong candidate of Arl2-interacting protein (Figure 6E).

351 Pericentrin, another centrosomal protein required for cortical development, also interacts with  
352 and recruits Cdk5rap2 to the centrosome in the mNPCs [16]. Interestingly, Alpha-fold  
353 multimer also predicts that Arl2 can potentially interact with Pericentrin with an ipTM score  
354 of 0.33 (Figure 6E). Centrobilin, a centriolar protein as a negative control for the interaction  
355 testing was predicted not to interact with Cdk5rap2 with an ipTM score of 0.17 by Alpha-fold  
356 multimer (Figure 6E).

357 To validate the predicted interaction between Arl2 and Cdk5rap2, we performed co-  
358 immunoprecipitation by over-expressing Arl2 (HA-Arl2) and Cdk5rap2 (Myc-Cdk5rap2) in  
359 HEK293 cells (Figure 6F). Following immunoprecipitation with a HA antibody, the resulting  
360 protein complexes exhibited an anticipated 37 kD band corresponding to HA-Arl2 as well as  
361 250 kD band corresponding to Myc-Cdk5rap2, suggesting that Arl2 and Cdk5rap2 physically  
362 associate with each other (Figure 6F). TBCD was used as positive control which also co-  
363 immunoprecipitated following precipitation with a HA antibody (Figure 6F). Similarly,  
364 following precipitation with Myc antibody, bands corresponding Myc-Cdk5rap2 and HA-Arl2  
365 were observed further confirming the interaction between Cdk5rap2 and Arl2 (Figure 6F).

366 To further validate the association between Arl2 and Cdk5rap2, we employed proximity  
367 ligation assay (PLA), a technique that enables the detection of protein-protein interactions with  
368 high specificity and sensitivity [37]. We co-expressed various proteins tagged with Myc or  
369 GFP in mNPCs and quantified PLA foci that indicated protein-protein interactions (Figure 6G-  
370 H). The vast majority of mNPCs co-expressing both Myc or GFP controls displayed weak  
371 fluorescence signal of merely a few PLA foci (Figure 6G-H;  $8.17 \pm 2.75$ ). Similarly, the vast  
372 majority of cells co-expressing Arl2-GFP with control Myc or Myc-Cdk5rap2 with control  
373 GFP displayed few PLA puncta per cell  $7.83 \pm 1.44$ ; Vector-GFP and Myc-Cdk5rap2,  $6.11 \pm$   
374  $1.99$ ), under each co-expression condition, respectively (Figure 6G-H). By contrast, mNPCs



375 co-expressing Arl2-GFP and Myc-Cdk5rap2 displayed strong signal with a plethora of PLA  
376 foci (Figure 6G-H;  $104 \pm 11.5$ ).

377 Taken together, our data indicates that Arl2 and Cdk5rap2 can physically interact with  
378 each other.

### 379 **Cdk5rap2 affects neuronal migration and proliferation *in vitro* and *in vivo*, similar to Arl2** 380 **loss-of-function**

381 Cdk5rap2 maintains NPC pool in the developing Neocortex [16]. We found similar  
382 neurogenesis defects following knocking down of Cdk5rap2 (Supplementary Figure 6).

383 Upon Cdk5rap2 KD in mNPCs by two independent shCdk5rap2-1 and shCdk5rap2-2 tagged  
384 with GFP, Cdk5rap2 protein level detected by anti-Cdk5rap2 antibodies in Western blot (WB)  
385 was reduced to 26% in shCdk5rap2-1 and 32% in shCdk5rap2-2, respectively, compared with  
386 the control (Supplementary Figure 6A-B), suggesting efficient knockdowns by both  
387 shCdk5rap2. Silencing endogenous Cdk5rap2 expression in the primary culture of mNPCs *in*  
388 *vitro* by lentivirus (pPurGreen) infection in 48 h culture resulted in a significant decrease in the  
389 intensity of Cdk5rap2 at the centrosomes in metaphase mNPCs (shCdk5rap2-1 = 115.6 A.U.;  
390 shCdk5rap2-2 = 107.5 A.U., respectively) as compared to control (Figure 6B, C; metaphase:  
391 153.0 A.U.). Similarly, the intensity of Cdk5rap2 at the centrosomes in interphase mNPCs  
392 (shCdk5rap2-1 = 34.73 A.U.; shCdk5rap2-2 = 44.53 A.U., respectively) was significantly  
393 reduced as compared to control (Supplementary Figure 6B, C; interphase: 77.37 A.U.).  
394 Furthermore, there was a significant reduction in  $\gamma$ -tubulin intensity upon Cdk5rap2 KD  
395 (shCdk5rap2-1 = 66.85 A.U.; shCdk5rap2-2 = 66.11 A.U., respectively) in metaphase mNPCs  
396 as well as at the centrosomes in interphase mNPCs (shCdk5rap2-1 = 32.02 A.U.; shCdk5rap2-  
397 2 = 36.29 A.U., respectively) at the as compared to control (metaphase: 114.9 A.U.; interphase:  
398 80.47 A.U.; Figure 6B, C and Supplementary Figure 6B, C). Remarkably, the proportion of

399 EdU+ cells in the primary culture of mNPCs was dramatically reduced upon Cdk5rap2 KD  
400 (shCdk5rap2-1 =  $26.42 \pm 7.89\%$ ; shCdk5rap2-2 =  $34.58 \pm 5.72\%$ , respectively) as compared  
401 to the control group (shCtrl =  $58.84 \pm 6.06\%$ ) (Supplementary Figure 6F, G).

402 We introduced Cdk5rap2 shRNA-1 via microinjection into the lateral ventricle of  
403 mouse embryos, followed by IUE at E13. At E14, one day after IUE and following 6-hour  
404 pulse-labelling with EdU before sample collection, we observed a substantial reduction in the  
405 proportion of EdU+/GFP+ double-labelled cells in the shCdk5rap2 group  $41.1 \pm 3.1\%$  as  
406 compared to the control group  $58.9 \pm 4.5\%$  (Figure 7A-B). Remarkably, at E17, four days after  
407 IUE, Cdk5rap2 knockdown resulted in a significant number of GFP+ cells to persist in the VZ  
408 + SVZ ( $13.34 \pm 3.31\%$ ) and IZ ( $27.85 \pm 3.02\%$ ) with fewer GFP+ cells migrating towards the  
409 CP ( $58.81 \pm 2.66\%$ ) as compared to control (Supplementary Figure 6H-I, Control, VZ + SVZ  
410 ( $4.20 \pm 2.73\%$ ), IZ ( $14.29 \pm 2.87\%$ ), CP ( $81.51 \pm 3.26\%$ ). This data suggests that loss of  
411 Cdk5rap2 affects neuronal migration and proliferation *in vitro* and *in vivo*, similar to Arl2 loss-  
412 of-function.

### 413 **Arl2 is required for the centrosomal localization of Cdk5rap2 in mNPCs**

414 Since we demonstrate that Arl2 co-localizes and physically associates with Cdk5rap2 at the  
415 centrosomes of mNPCs (Figure 6), we wondered whether Arl2 is required for the centrosomal  
416 localization of Cdk5rap2 in mNPCs. Indeed, Cdk5rap2 centrosomal localization was  
417 diminished upon Arl2 knockdown in mNPCs at interphase (supplementary Figure 6C-D) and  
418 mitosis (Figure 6B-C). Furthermore, Cdk5rap2 intensity were significantly reduced upon Arl2  
419 knockdown in mNPCs at interphase (46.14 A.U.) (supplementary Figure 6C-D) and at  
420 metaphase (94.5 A.U.) (Figure 6B-C) as compared to the control (interphase: 77.37 A.U.;  
421 metaphase: 153.0 A.U.). Moreover, Cdk5rap2 protein levels were significantly reduced upon  
422 Arl2 knockdown in mNPCs by Western blotting analysis (Figure 7C-D; shCdk5rap2-1 = 0.26

423  $\pm 0.21$  and shCdk5rap2-2 =  $0.32 \pm 0.20$ ; shArl2 =  $0.29 \pm 0.11$  normalized in shCtrl, n = 3).  
424 Conversely, Arl2 protein levels in mNPCs were not obviously affected by Cdk5rap2  
425 knockdown as compared to the control (Figure 7C, E, shCdk5rap2-1 =  $0.95 \pm 0.11$  and  
426 shCdk5rap2-2 =  $1.05 \pm 0.09$ ; shArl2 =  $0.22 \pm 0.07$  normalized in shCtrl, n = 3). Thus, Arl2 is  
427 required for localization and stabilization of Cdk5rap2 at the centrosomes in mNPCs.

### 428 **Cdk5rap2 overexpression rescues neurogenesis defects caused by Arl2 depletion in mouse** 429 **developing cortex**

430 To determine whether Cdk5rap2 is a physiological relevant target of Arl2 during neurogenesis  
431 *in vivo*, we overexpressed Cdk5rap2 along with Arl2 knockdown via microinjection into the  
432 lateral ventricle of mouse embryos, followed by IUE at E13, and examined cortical  
433 neurogenesis. Remarkably, Cdk5rap2 overexpression notably rescued neurogenesis defects  
434 caused by Arl2 KD *in vivo* (Figure 7). Two days after IUE at E15, the total number of  
435 GFP+EdU+ double positive cells in VZ+SZ as well as IZ was significantly rescued by  
436 overexpression of Cdk5rap2 in Arl2 KD brains (Figure 7F-G, VZ+SVZ; Control =  $11.14 \pm$   
437  $1.04\%$ , shArl2 =  $4.87 \pm 0.81\%$ , shCtrl + Cdk5rap2 =  $9.32 \pm 1.63\%$ , shArl2 + Cdk5rap2 =  $10.08$   
438  $\pm 1.31\%$ ; IZ; Control =  $49.41 \pm 6.25\%$ , shArl2 =  $22.17 \pm 3.98\%$ , shCtrl + Cdk5rap2 =  $43.84 \pm$   
439  $7.89\%$ , shArl2 + Cdk5rap2 =  $41.68 \pm 16.74\%$ ). Furthermore, three days after IUE at E16, the  
440 number of GFP+ cells migrating to the CP in Arl2-depleted mouse brains by  
441 overexpressing Cdk5rap2 was dramatically increased to 18.45% compared with 7.70% in Arl2  
442 KD brains (Figure 7H, I). These genetic data further support our model that Arl2 regulates NPC  
443 proliferation, migration and differentiation in mouse cortical development by interacting with  
444 Cdk5rap2 to promote microtubule growth from the centrosomes.

445

446

## 447 **Discussion**

448 In this study, we demonstrate for the first time that the mammalian ADP ribosylation factor-  
449 like 2 (Arl2), a small GTPase, plays an important role in corticogenesis of the mouse brain. We  
450 have identified Arl2 as a new regulator in proliferation and differentiation of mouse NPCs and  
451 neuronal migration. Arl2 controls neurogenesis through the regulation of microtubule growth,  
452 independent of its function in mitochondrial fusion. We further demonstrate that Arl2  
453 physically associates with Cdk5rap2, a centrosomal protein known to be important for  
454 microtubule organization and cortical development. Finally, Arl2 functions upstream of  
455 Cdk5rap2 to localize and stabilize Cdk5rap2 at the centrosome to regulate microtubule growth  
456 and neuronal migration (Figure 7J). Taken together, our data has identified a novel Arl2-  
457 Cdk5rap2 pathway in the regulation of microtubule growth and proliferation of mouse NPCs  
458 during cortical development.

459

### 460 **Arl2 regulates mouse corticogenesis via microtubule growth**

461 Although mammalian Arl2 has been shown to be widely expressed in various tissues and is  
462 most abundant in the brain [30], the role of mammalian Arl2 in regulating mouse corticogenesis  
463 was unknown. In this study, we demonstrate the importance of Arl2 in regulating NPC  
464 proliferation and differentiation and neuronal migration during mouse cortical development.  
465 We provide evidence that Arl2 is required for centrosome assembly and spindle orientation in  
466 NPCs, similar to Cdk5rap2. Our finding is in line with the role of centrosomal/microtubule  
467 regulators in spindle orientation of NPCs [38, 39]. Our finding also suggest that mouse Arl2  
468 has a novel role in neurite outgrowth in neurons *in vitro*. All these findings highlight the  
469 importance of mouse Arl2 in regulating microtubule growth during corticogenesis.

470           Similar to the previous finding that transgenic ARL2-Q70L animals exhibit reduced  
471 photoreceptor cell function and progressive rod degeneration [40], we found that  
472 overexpression of these mutant forms of Arl2 caused cell death of mouse NPCs both *in vitro*  
473 and *in vivo*. This is consistent with a recent report showing that lengthening mitosis of neural  
474 progenitor cells resulted in apoptosis of new-born neural progeny [41]. Likewise, human Arl2  
475 plays an essential role for the survival of human embryonic stem cell-derived neural progenitor  
476 cells [42]. In human brain organoid models, defects in mitosis of neural stem cells is associated  
477 with decrease in stem cell number and apoptosis [18]. Given that our work highlights a novel  
478 role of mammalian Arl2 in mouse cortical development *in vivo* and the conservation of Arl2 in  
479 mouse and humans, it will be of great interest to investigate the role of human Arl2 in NPC  
480 divisions during cortical development.

481           It was reported that mitochondria functions are important for RG proliferation [43].  
482 RGs display fused mitochondria, while new-born neurons have highly fragmented  
483 mitochondria right after mitosis of NPCs [43]. Increased mitochondria fission promotes  
484 neuronal fate, while induction of mitochondria fusion after mitosis redirect daughter cells  
485 toward self-renewal [43]. Although Arl2 is localized to mitochondria and regulates  
486 mitochondria fusion *in vitro* [26, 30, 32], we found that neither Arl2 knockdown nor  
487 overexpression of Arl2 obviously altered mitochondrial morphology in the mouse developing  
488 brain. In addition, overexpression of Arl<sup>K71R</sup> mutant, which causes mitochondrial  
489 fragmentation without disrupting microtubule assembly [32], behaves similarly to Arl2 wild-  
490 type in the mNPC proliferation or neuronal migration during neurogenesis *in vivo* or in our  
491 microtubule regrowth assay *in vitro*. Therefore, the novel role of Arl2 in regulating

492 neurogenesis in the developing cortex is most likely due to its role in microtubule growth,  
493 independent of its function in mitochondrial fusion.

#### 494 **Arl2 plays a novel role in regulating neurogenesis via Cdk5rap2 function**

495 Based on *in silico* analysis by AlphaFold multimer, co-immunoprecipitation, and PLA, we  
496 provide strong evidence that Arl2 physically associates with the centrosomal protein Cdk5rap2.  
497 Moreover, our super-resolution imaging clearly shows that Arl2 co-localizes with Cdk5rap2 at  
498 the PCM of the centrosomes. Cdk5rap2 is known to regulate centrosomal function and maintain  
499 the neural progenitor pool in the developing cortex [16, 44]. However, in addition to a similar  
500 defect in NPC proliferation upon Cdk5rap2 knockdown, we observed additional neuronal  
501 migration defects following Cdk5rap2 depletion that mimics Arl2 knockdown. Importantly,  
502 Cdk5rap2 overexpression rescues the loss of function phenotype of Arl2 in mice, leading to  
503 restored NPC proliferation and neuronal migration to the cortical plate. Therefore, Arl2  
504 functions upstream of Cdk5rap2 in controlling NPC proliferation and neuronal migration via  
505 centrosomal functions. Pericentrin, another centrosomal protein required for cortical  
506 development, also interacts with and recruits Cdk5rap2 to the centrosome in the mNPCs [16].  
507 Consistent with this finding, our analysis by AlphaFolder multimer also predicts that Arl2 can  
508 potentially interact with Pericentrin with an ipTM score of 0.33 (Figure 6E). The centrosome  
509 and the primary cilium at the apical RGs are intricately connected, both of which control NPC  
510 proliferation [45]. Interestingly, a recent study showed a role of Arl2 in cilia stability in rod  
511 photoreceptor neurons, as Arl2Q70L overexpression caused decreased function and  
512 degeneration of these cells [40]. Future study is warranted to determine whether Arl2 is also  
513 involved in ciliogenesis in RGs.

514 Radial glial cells exhibit a bipolar morphology with an apical process anchored to the  
515 ventricular surface and a basal process projecting towards the pial surface of the brain

516 [46]. The centrosomes are located at the apical endfoot of the apical process, while  
517 microtubules in the basal process are largely acentrosomal where  $\gamma$ -tubulin was undetectable  
518 and instead are organized by Golgi outposts [47]. Whether Arl2 can also potentially involved  
519 in microtubule assembly within the basal process remains unknown and will be intriguing for  
520 future investigations.

521         Loss-of-function variants of Cdk5rap2 are associated with Primary autosomal-recessive  
522 microcephaly (MCPH) [48]. Although Arl2 variants have not been found in brain disorders,  
523 recent studies identified Arl2 as a candidate gene for an eye disorder [49] and its role in early  
524 photoreceptor development via its microtubule functions [50]. Interestingly, mouse Cdk5rap2  
525 was also shown recently to be required for eye development by affecting retina progenitor cell  
526 proliferation and apoptosis [51], suggesting that Cdk5rap2 might be linked to Arl2 in other cell  
527 types beyond the developing cortex.

528         Taken together, our study highlights the critical role of Arl2 regulates NPC proliferation  
529 and neuronal migration during mouse cortical development. Mechanistically, Arl2 physically  
530 associates and recruits Cdk5rap2 to the centrosomes to promote microtubule assembly in NPCs  
531 and neuronal migration. These discoveries may facilitate the development of potential  
532 therapeutic strategies for neurodevelopmental disorders.

533

## 534 **Materials and Methods**

### 535 **Animals**

536 All animal studies were performed under the Institutional Animal care and use committee  
537 (IACUC) approved protocol (IACUC Protocol: 2016/SHS/1207 and 2021/SHS/1672).

538 C57BL/6 mice were purchased from InVivos for the in-utero electroporation and for primary  
539 mouse neural progenitor cell culture experiments.

#### 540 **DNA constructs**

541 Arl2 full length cDNA and 3 mutant form (Arl2<sup>Q70L</sup>, Arl2<sup>T30N</sup> and Arl2<sup>K71R</sup>), and Cdk5rap2  
542 from mouse and human were cloned into FUGW (Addgene plasmid # 14883) [52], FUtdTW  
543 (Addgene plasmid # 22478) [53], pBiFC-VC155 (Addgene plasmid # 22011) [54] and pBiFC-  
544 VN155 (I152L) (Addgene plasmid # 27097) [55] constructs. Small hairpin RNAs were cloned  
545 into pGreenPuro™ constructs from SBI, system biosciences (cat no: #s SI505A-1). Two  
546 shRNAs target different regions of mouse Arl2 (shArl2-1 and shArl2-2), Cdk5rap2  
547 (shCdk5rap2-1 and shCdk5rap2-2) and one control shRNA with scrambled sequence were  
548 designed.

549 The following different sets of short hairpin sequences were cloned into pGreenPuro vectors:

550 shArl2-1 (CATCGACTGGCTCCTTGATGACATTTCCA) and shArl2-2  
551 (GACACTGGGCTTCAACATCAAGACCCTGG); shCdk5rap2-1  
552 (GCACATCTACAAGACGAACAT) (Sigma, TRCN0000179786) and shCdk5rap2-2  
553 (GCCATCAAGATACGATTCATT) (Sigma, TRCN0000183538).

#### 554 **HEK293T culture and lentiviruses package**

555 Clontech's HEK 293T cell line were cultured in D-MEM high glucose medium (Invitrogen),  
556 containing 4.5 g/L D-glucose, and 4 mM L-glutamine. For packaging viral vector, high titers  
557 of engineered lentiviruses were produced by co-transfection of lentiviral vectors (FUGW, or  
558 FUtdTW or pGreenPuro), psPAX2 and pMD2.G into HEK293T cells followed by  
559 ultracentrifugation of viral supernatant as previously described [56].



## 560 **Mouse neural progenitor cells (mNPCs) culture**

561 Mouse embryos were harvested at E14, and the dorsolateral cortex was dissected and  
562 enzymatically triturated to isolate NPCs as Supplementary Figure 1A. NPCs were suspension-  
563 cultured in Costar® 6-well Clear Flat Bottom Ultra-Low Attachment Multiple Well Plates  
564 (Corning) in proliferation medium (NeuroCult™ Proliferation Kit (Mouse & Rat),  
565 STEMCELL) containing human EGF (10 ng/ml), human FGF2 (10 ng/ml) (Invitrogen,  
566 Carlsbad, CA), N2 supplement (1%) (GIBCO), penicillin (100 U/ml), streptomycin (100  
567 mg/ml), and L-glutamine (2 mM) for 7 days and were allowed to proliferate to form  
568 neurospheres. DIV 7 neurospheres were dissociated into single cells using accutase, yielding  
569  $5\text{-}6 \times 10^6$  cells per 6-well plate. For proliferation assay, forty-eight hours lentivirus (pPurGreen)  
570 infection, the cells were pulsed with 1 mM 5-Ethynyl-2'-deoxyuridine (EdU, Invitrogen) for 3  
571 hr. In vitro NPC differentiation assay, mNPC cells were seeded onto 24-well plate with 60 mm  
572 coverslips coated with poly-L-lysine, at a density of  $4.5 \times 10^4$  cells/coverslip. Twenty-four  
573 hours lentivirus (pPurGreen) infection, NPCs were cultured as monolayer in differentiation  
574 medium containing B27 (2%) in Neurobasal medium and were maintained for 5–6 days.

## 575 **Cortical primary neuron culture**

576 Primary cultures of cortical neurons were prepared from embryonic day 18 (E18) mice as  
577 previously described [56]. Briefly, the cortex was carefully dissected from the E18 brain in  
578 Earle's Balanced salt solution (EBSS - Gibco 0766) and collected in buffer (127 mM NaCl, 5  
579 mM KCl, 170  $\mu$ M Na<sub>2</sub>HPO<sub>4</sub>, 205  $\mu$ M KH<sub>2</sub>PO<sub>4</sub>, 5 mM Glucose, 59 mM Sucrose, 100 U/mL  
580 Penicillin/Streptomycin, pH 7.4). Cells were dissociated using 25 mg/ml papain. After  
581 collection in growth medium (Dulbecco's Modified Eagle's Medium w/GlutaMax (Invitrogen)  
582 containing 1 M HEPES, 10% heat inactivated Horse Serum (Invitrogen), and 100 U/mL

583 Penicillin/Streptomycin, pH 7.4) cells were filtered through a 70  $\mu$ M cell strainer.  
584 Subsequently, cells were seeded onto 24-well plate with 60 mm coverslips coated with poly-  
585 L-lysine, at a density of  $4.5 \times 10^4$  cells/coverslip.  
586

### 587 **In-utero electroporation**

588 In-utero electroporation was performed as described previously [57]. Pregnant E13 mice were  
589 anesthetized with isoflurane and proceeded with the laparotomy procedure. Small hairpin  
590 plasmid DNA with the GFP or overexpression plasmid with tdTomato reporter (2-3  $\mu$ g/ $\mu$ l) was  
591 injected into the lateral ventricles of the embryos through the uterine wall. Subsequently for  
592 the electroporation, four electrical pulses of 35V, 50 msec was administered with the  
593 electroporator device and the mice were allowed to undergo normal development after the  
594 surgery. The electroporated embryonic mice brains were harvested at E14, E15, E16 and E17  
595 for the cell proliferation, differentiation and migration analysis.

### 596 **EdU (5-Ethynyl-2'-deoxyuridine) incorporation assay**

597 For EdU labelling experiments in mice, EdU was injected intraperitoneally into the pregnant  
598 mice and the mice were sacrificed after 6hrs for brain harvest. The brain samples were  
599 subjected to standard immunochemistry procedure. The incorporated EdU was detected using  
600 fluoro azide from ClickiT® EdU Imaging Kit (Invitrogen).

### 601 **Tissue preparation and immunostaining analysis**

602 Embryonic mice were dissected in PBS and the embryonic brain samples were fixed in 4%  
603 Paraformaldehyde overnight, subsequently the brain samples were stored in 30% sucrose prior  
604 to sectioning. The brain samples were mounted in Tissue-Tek embedding medium and were  
605 sectioned using cryostat. For mouse neural progenitor cells, the cells were grown on coverslips  
606 and fixed with 4% Paraformaldehyde for 15 mins at RT. Subsequently the cells were washed  
607 with PBS twice and stored prior to staining. Cells and brain sections were consequently washed

608 with TBS and blocked with 5% Normal donkey serum in TBS with 0.1% Triton X (TBST).  
609 Respective primary antibodies were prepared with the blocking solution and incubated for 2  
610 hours at RT. Subsequently the cells were washed with TBST and proceeded with secondary  
611 fluorophore antibodies incubation for 1 hour at RT. For the detection of EdU incorporated cells  
612 and tissues, Alexa fluor azide was used as per the protocol described (ClickiT® EdU Imaging  
613 Kits; Invitrogen). The cells and tissues were washed and mounted for imaging. Micrographs  
614 were taken using LSM710 confocal microscope system (Axio Observer Z1; ZEISS), fitted with  
615 a PlanApochromat 40x/1.3 NA oil differential interference contrast objective, and brightness  
616 and contrast were adjusted by ImageJ.

617 The primary antibodies used in this paper, rabbit anti-TBR1 (1:500; Cell signalling, cat  
618 no: 49661S), rabbit anti-TBR2 (1:500; abcam, cat no: ab23345), rabbit anti-Pax6 (1:500;  
619 BioLegend, cat no: B328397), mouse anti-alpha tubulin (1:1000; Sigma, cat no: T6199), mouse  
620 anti-gamma tubulin (1:500; Sigma, cat no: T5326), mouse anti-DCX (1:300; Cruz  
621 biotechnology, cat no: A0919), rabbit anti-Ki67 (1:500; abcam, cat no: ab16667), rat anti-PH3  
622 (1:500; sigma, cat no: 4882), rabbit anti-NeuroD2 (1:500, abcam, cat no: ab104430), rabbit  
623 anti-caspase3 (1:500; BD Pharmingen, cat no: 559569), rabbit anti-Cdk5rap2 (1:500, Merck  
624 Millipore, cat no: 06-1398), rabbit anti-Arl2 (1:300; abcam, cat no: ab183510), mouse anti-  
625 myc (1:500; abcam, cat no:1011022-5), guinea pig anti-GFP (1:1000; Dr. Yu Feng Wei lab),  
626 mouse anti-GFP (1:1000; Dr. Yu Feng Wei lab), rabbit anti-HA (1:500; Sigma, cat no: H6908 ),  
627 rat anti-HA (1:500; Roche, cat no:423001).

## 628 **Proximity ligation assay**

629 Proximity ligation assay (PLA) was performed as described ([58], Adopted from Duolink PLA,  
630 Merck). Mouse neural progenitor cells were transfected with the following constructs including  
631 control-GFP, control-myc, Arl2-GFP and Cdk5rap2-myc using Lipofectamine Transfection

632 reagent (Invitrogen). The cells were washed with cold PBS thrice and fixed with 4%  
633 paraformaldehyde in PB for 15 min. Subsequently, the cells were blocked with 5% normal  
634 donkey serum in TBS-Tx (0.1% Triton-X100) for 45 min. The cells were incubated with  
635 respective primary antibodies at RT for 2 hrs. The cells were then incubated with PLA probes  
636 at 37°C for 1 hr. Subsequently, the cells were washed Buffer A for 5mins at RT. The cells were  
637 proceeded with ligation of probes at 37°C for 30 min and amplification at 37°C for 1.5 hrs,  
638 followed by two washes with Buffer B at RT. The cells were washed once with 0.01x Buffer  
639 B and proceeded with primary antibodies incubation diluted in 3% BSA in PBS for 2 hrs at RT.  
640 Following this, the cells were washed twice with 0.1% TBS-TX and incubated with secondary  
641 antibodies for 1.5 hrs at RT. The cells were subsequently washed with PB and then mounted  
642 using *in situ* mounting media with DAPI (Duolink, Sigma-Aldrich).

643

#### 644 **Microtubule regrowth assay**

645 Mouse neural progenitor cells were incubated with 2.5mM thymidine at 37°C for 20 hrs to  
646 induce S phase arrest (Figure 3A). Subsequently the cells were released from S phase arrest for  
647 7 hrs. The cells were then incubated with 200 nM nocodazole for 4 hrs. The cells were washed  
648 with ice cold medium and incubated on ice for 30 min to initiate microtubule depolymerisation.  
649 The cells were subsequently replaced with pre-warmed medium at 37°C. The cells were  
650 washed with PBS and were incubated in 4% paraformaldehyde for 15 min to fix the cells. The  
651 standard immunocytochemistry assay was performed to quantify the Alpha-tubulin density.

652

#### 653 **Co-immunoprecipitation**

654 Cells were lysed using Pierce™ IP lysis buffer (ThermoFisher Scientific, cat no: 87787) with  
655 protease inhibitors. 1% cell lysate was taken for input controls and the remaining were  
656 incubated with respective pulldown antibodies overnight at 4°C. Protein A/G ultra-link resin  
657 beads (ThermoFisher Scientific, cat no: 53135) were added to the cell lysate and incubated for

658 3 hours at 4°C. Consequently, the beads were washed with PBS for several times to remove  
659 the residual proteins. The beads were mixed with the protein loading dye and proceeded for  
660 western blot analysis.

### 661 **Western blot analysis**

662 Cells were lysed using Pierce™ RIPA buffer (ThermoFisher Scientific, cat no: 89901) with  
663 protease inhibitors. The proteins samples were separated using SDS-PAGE and were  
664 transferred onto the nitrocellulose membrane. The membranes were blocked with low fat dry  
665 milk in Phosphate buffered saline (PBS) with 0.1% tween20 (PBST) for 1 hr at RT.  
666 Subsequently, the membranes were incubated with respective primary antibodies in 5% Bovine  
667 serum albumin (BSA) with PBST overnight at 4°C. The membranes were washed thrice with  
668 PBST and incubated with HRP-conjugated secondary antibodies to probe the target proteins  
669 for 1 hr at RT. The membranes were washed and the proteins were detected using Super  
670 signal™ west pico chemiluminescence substrate (Protein biology, cat no: 34580).

### 671 **AlphaFold2-multimer protein complex prediction**

672 To discover Arl2 interactors with centrosome proteins, we performed protein complex  
673 predictions using Alphafold-multimer developed by DeepMind [59]. Arl2 was predicted  
674 against core centrosome proteins. All the predictions were performed using AlphaPulldown  
675 Pipeline v0.30.6 [35] with default settings. Multiple sequence alignments (MSAs) and template  
676 input to the Alphafold-multimer were calculated by MMseqs2 [36]. To analyse the results  
677 produced by AlphaFold-multimer, interface pTM (ipTM) scores from the predictions were  
678 used to evaluate the interaction possibility and confidence. Predicted interaction structure  
679 model were used for further analysis.

### 680 **Spinning disc super-resolution imaging**

681 Super-resolution imaging was performed as previously described [60]. In brief, super-  
682 resolution Spinning Disc Confocal-Structured Illumination Microscopy (SDC-SIM) was  
683 performed on a spinning disk system (Gataca Systems) based on an inverted microscope  
684 (Nikon Ti2-E; Nikon) equipped with a confocal spinning head (CSU-W; Yokogawa), a Plan-  
685 Apo objective (100×1.45-NA), a back-illuminated sCMOS camera (Prime95B; Teledyne  
686 Photometrics) and a super-resolution module (Live-SR; GATACA Systems). All image  
687 acquisition and processing were controlled by the MetaMorph (Molecular Device) software.  
688 Images were further processed with imageJ.

### 689 **Live-cell imaging**

690 To capture time-lapse images of mouse neural progenitor cells (mNPCs), a super-resolution  
691 spinning disk confocal-structured illumination microscopy equipped with a Plan-Apo objective  
692 (100× 1.45-NA) was used. The imaging was conducted in a chamber at a temperature of 37°C  
693 with CO<sub>2</sub> supplement. mNPCs were imaged for 16 hours (5 min each time interval for Figure  
694 4H and Sup. Figure 5A) or for 5 min without intervals (for Figure 5C). The videos were  
695 processed using and ImageJ software. Mito-RFP tracker (Plasmid #51013) was from Addgene  
696 (pLenti.CAG.H2B-cerFP-2A-mito-dsRFP.W). Viafluor-488 live cell microtubule staining kit  
697 (Biotium, #70062) were used for live imaging of mNPCs *in vitro*.

### 698 **Tracking of EB3-GFP or EB3-Td comets**

699 mNPCs expressing EB3-GFP or EB3-Td were subjected to live-cell imaging using a super-  
700 resolution spinning disk confocal-structured illumination microscopy as mentioned above. The  
701 amount and velocity of the EB3-GFP comets were calculated and kymographs were generated  
702 using KymoButler [61]. A cell was imaged for 3-5 min without time interval for each movie  
703 and videos were generated with NIH ImageJ software.

### 704 **Statistical analysis**

705 All experiments were repeated at least thrice, and comparable results were obtained. All  
706 statistical analysis was performed using GraphPad prism. Paired or unpaired T-test were used  
707 for the comparison of two independent groups and one-way or two-way Anova were used for  
708 comparing more than two independent groups. Statistical significance was represented by  
709 \*\*\* $p < 0.001$ , \*\* $p < 0.01$ , \* $p < 0.05$  compared with the control groups.

710

## 711 **Acknowledgments**

712 This work is supported by Singapore Ministry of Education Tier 2 MOE-T2EP30121-0002 to  
713 H.W.

714

## 715 **Author contributions**

716 Conceptualization, DM and HW; Methodology, Data curation, and formal analysis, DM, K-  
717 YL, SD, JL, MG, YST, HYA, ASV, GY, TC; Writing-original draft, DM, SD, MG and HW;  
718 Writing-review & editing, HW, DM, and MG; funding acquisition, HW; Resources, HW;  
719 Supervision, DM and HW.

720

## 721 **DECLARATION OF INTERESTS**

722 The authors declare no competing interests.

723

724

## 725 **References**

- 726 1. Taverna E, Gotz M, Huttner WB. The cell biology of neurogenesis: toward an  
727 understanding of the development and evolution of the neocortex. *Annu Rev Cell Dev Biol.*  
728 2014;30:465-502. Epub 20140627. doi: 10.1146/annurev-cellbio-101011-155801. PubMed  
729 PMID: 25000993.
- 730 2. Shitamukai A, Matsuzaki F. Control of asymmetric cell division of mammalian neural  
731 progenitors. *Development, growth & differentiation.* 2012;54(3):277-86.
- 732 3. Itoh Y, Tyssowski K, Gotoh Y. Transcriptional coupling of neuronal fate commitment  
733 and the onset of migration. *Current Opinion in Neurobiology.* 2013;23(6):957-64. doi:  
734 <https://doi.org/10.1016/j.conb.2013.08.003>.
- 735 4. Furutachi S, Miya H, Watanabe T, Kawai H, Yamasaki N, Harada Y, et al. Slowly  
736 dividing neural progenitors are an embryonic origin of adult neural stem cells. *Nature*  
737 *Neuroscience.* 2015;18(5):657-65. doi: 10.1038/nn.3989.
- 738 5. Telley L, Agirman G, Prados J, Amberg N, Fièvre S, Oberst P, et al. Temporal  
739 patterning of apical progenitors and their daughter neurons in the developing neocortex.  
740 *Science.* 2019;364(6440):eaav2522. doi: doi:10.1126/science.aav2522.
- 741 6. Beattie R, Hippenmeyer S. Mechanisms of radial glia progenitor cell lineage  
742 progression. *FEBS Lett.* 2017;591(24):3993-4008. Epub 20171122. doi: 10.1002/1873-  
743 3468.12906. PubMed PMID: 29121403; PubMed Central PMCID: PMC5765500.
- 744 7. Dwyer ND, Chen B, Chou S-J, Hippenmeyer S, Nguyen L, Ghashghaei HT. Neural  
745 Stem Cells to Cerebral Cortex: Emerging Mechanisms Regulating Progenitor Behavior and  
746 Productivity. *The Journal of Neuroscience.* 2016;36(45):11394-401. doi:  
747 10.1523/jneurosci.2359-16.2016.
- 748 8. Shahbazi MN, Zernicka-Goetz M. Deconstructing and reconstructing the mouse and  
749 human early embryo. *Nature Cell Biology.* 2018;20(8):878-87. doi: 10.1038/s41556-018-  
750 0144-x.
- 751 9. Bhamidipati A, Lewis SA, Cowan NJ. ADP ribosylation factor-like protein 2 (Arl2)  
752 regulates the interaction of tubulin-folding cofactor D with native tubulin. *J Cell Biol.*  
753 2000;149(5):1087-96. doi: 10.1083/jcb.149.5.1087. PubMed PMID: 10831612; PubMed  
754 Central PMCID: PMC2174823.
- 755 10. Marchetto MC, Belinson H, Tian Y, Freitas BC, Fu C, Vadodaria KC, et al. Altered  
756 proliferation and networks in neural cells derived from idiopathic autistic individuals.  
757 *Molecular Psychiatry.* 2017;22(6):820-35. doi: 10.1038/mp.2016.95.



- 758 11. Wang M, Wei PC, Lim CK, Gallina IS, Marshall S, Marchetto MC, et al. Increased  
759 Neural Progenitor Proliferation in a hiPSC Model of Autism Induces Replication Stress-  
760 Associated Genome Instability. *Cell Stem Cell*. 2020;26(2):221-33.e6. Epub 20200130. doi:  
761 10.1016/j.stem.2019.12.013. PubMed PMID: 32004479; PubMed Central PMCID:  
762 PMC7175642.
- 763 12. Prem S, Millonig JH, DiCicco-Bloom E. Dysregulation of Neurite Outgrowth and Cell  
764 Migration in Autism and Other Neurodevelopmental Disorders. In: DiCicco-Bloom E,  
765 Millonig JH, editors. *Neurodevelopmental Disorders : Employing iPSC Technologies to*  
766 *Define and Treat Childhood Brain Diseases*. Cham: Springer International Publishing; 2020. p.  
767 109-53.
- 768 13. Kamiya A, Tan PL, Kubo K, Engelhard C, Ishizuka K, Kubo A, et al. Recruitment of  
769 PCM1 to the centrosome by the cooperative action of DISC1 and BBS4: a candidate for  
770 psychiatric illnesses. *Arch Gen Psychiatry*. 2008;65(9):996-1006. doi:  
771 10.1001/archpsyc.65.9.996. PubMed PMID: 18762586; PubMed Central PMCID:  
772 PMC2727928.
- 773 14. Weghe JCVD, Gomez A, Doherty D. The Joubert–Meckel–Nephronophthisis  
774 Spectrum of Ciliopathies. *Annual Review of Genomics and Human Genetics*. 2022;23(1):301-  
775 29. doi: 10.1146/annurev-genom-121321-093528. PubMed PMID: 35655331.
- 776 15. Zhang W, Kim PJ, Chen Z, Lokman H, Qiu L, Zhang K, et al. MiRNA-128 regulates  
777 the proliferation and neurogenesis of neural precursors by targeting PCM1 in the developing  
778 cortex. *eLife*. 2016;5:e11324. doi: 10.7554/eLife.11324.
- 779 16. Buchman JJ, Tseng H-C, Zhou Y, Frank CL, Xie Z, Tsai L-H. Cdk5rap2 Interacts with  
780 Pericentrin to Maintain the Neural Progenitor Pool in the Developing Neocortex. *Neuron*.  
781 2010;66(3):386-402. doi: <https://doi.org/10.1016/j.neuron.2010.03.036>.
- 782 17. Zaqout S, Blaesius K, Wu YJ, Ott S, Kraemer N, Becker LL, et al. Altered inhibition  
783 and excitation in neocortical circuits in congenital microcephaly. *Neurobiol Dis*.  
784 2019;129:130-43. Epub 20190515. doi: 10.1016/j.nbd.2019.05.008. PubMed PMID: 31102767.
- 785 18. Lancaster MA, Renner M, Martin C-A, Wenzel D, Bicknell LS, Hurles ME, et al.  
786 Cerebral organoids model human brain development and microcephaly. *Nature*.  
787 2013;501(7467):373-9. doi: 10.1038/nature12517.
- 788 19. Bond J, Roberts E, Springell K, Lizarraga S, Scott S, Higgins J, et al. A centrosomal  
789 mechanism involving CDK5RAP2 and CENPJ controls brain size. *Nature Genetics*.  
790 2005;37(4):353-5. doi: 10.1038/ng1539.

- 791 20. Zhou C, Cunningham L, Marcus AI, Li Y, Kahn RA. Arl2 and Arl3 regulate different  
792 microtubule-dependent processes. *Mol Biol Cell*. 2006;17(5):2476-87. Epub 20060308. doi:  
793 10.1091/mbc.e05-10-0929. PubMed PMID: 16525022; PubMed Central PMCID:  
794 PMCPMC1446103.
- 795 21. Francis JW, Turn RE, Newman LE, Schiavon C, Kahn RA. Higher order signaling:  
796 ARL2 as regulator of both mitochondrial fusion and microtubule dynamics allows integration  
797 of 2 essential cell functions. *Small GTPases*. 2016;7(4):188-96. Epub 20160711. doi:  
798 10.1080/21541248.2016.1211069. PubMed PMID: 27400436; PubMed Central PMCID:  
799 PMCPMC5129891.
- 800 22. Chen K, Koe CT, Xing ZB, Tian X, Rossi F, Wang C, et al. Arl2- and Msps-dependent  
801 microtubule growth governs asymmetric division. *J Cell Biol*. 2016;212(6):661-76. Epub  
802 20160307. doi: 10.1083/jcb.201503047. PubMed PMID: 26953351; PubMed Central PMCID:  
803 PMCPMC4792071.
- 804 23. Shern JF, Sharer JD, Pallas DC, Bartolini F, Cowan NJ, Reed MS, et al. Cytosolic Arl2  
805 is complexed with cofactor D and protein phosphatase 2A. *J Biol Chem*. 2003;278(42):40829-  
806 36. Epub 20030811. doi: 10.1074/jbc.M308678200. PubMed PMID: 12912990.
- 807 24. Kahn RA, Volpicelli-Daley L, Bowzard B, Shrivastava-Ranjan P, Li Y, Zhou C, et al.  
808 Arf family GTPases: roles in membrane traffic and microtubule dynamics. *Biochemical*  
809 *Society Transactions*. 2005;33(6):1269-72. doi: 10.1042/bst0331269.
- 810 25. Nithianantham S, Le S, Seto E, Jia W, Leary J, Corbett KD, et al. Tubulin cofactors and  
811 Arl2 are cage-like chaperones that regulate the soluble  $\alpha\beta$ -tubulin pool for microtubule  
812 dynamics. *Elife*. 2015;4. Epub 20150724. doi: 10.7554/eLife.08811. PubMed PMID:  
813 26208336; PubMed Central PMCID: PMCPMC4574351.
- 814 26. Newman LE, Schiavon CR, Turn RE, Kahn RA. The ARL2 GTPase regulates  
815 mitochondrial fusion from the intermembrane space. *Cell Logist*. 2017;7(3):e1340104. Epub  
816 20170623. doi: 10.1080/21592799.2017.1340104. PubMed PMID: 28944094; PubMed  
817 Central PMCID: PMCPMC5602422.
- 818 27. Schiavon CR, Turn RE, Newman LE, Kahn RA. ELMOD2 regulates mitochondrial  
819 fusion in a mitofusin-dependent manner, downstream of ARL2. *Mol Biol Cell*.  
820 2019;30(10):1198-213. Epub 20190313. doi: 10.1091/mbc.E18-12-0804. PubMed PMID:  
821 30865555; PubMed Central PMCID: PMCPMC6724520.
- 822 28. Davidson AE, Schwarz N, Zelinger L, Stern-Schneider G, Shoemark A, Spitzbarth B,  
823 et al. Mutations in ARL2BP, encoding ADP-ribosylation-factor-like 2 binding protein, cause  
824 autosomal-recessive retinitis pigmentosa. *Am J Hum Genet*. 2013;93(2):321-9. Epub

- 825 20130711. doi: 10.1016/j.ajhg.2013.06.003. PubMed PMID: 23849777; PubMed Central  
826 PMCID: PMCPMC3738823.
- 827 29. Cai XB, Wu KC, Zhang X, Lv JN, Jin GH, Xiang L, et al. Whole-exome sequencing  
828 identified ARL2 as a novel candidate gene for MRCS (microcornea, rod-cone dystrophy,  
829 cataract, and posterior staphyloma) syndrome. *Clinical Genetics*. 2019;96(1):61-71.
- 830 30. Sharer JD, Shern JF, Van Valkenburgh H, Wallace DC, Kahn RA. ARL2 and BART  
831 enter mitochondria and bind the adenine nucleotide transporter. *Mol Biol Cell*. 2002;13(1):71-  
832 83. doi: 10.1091/mbc.01-05-0245. PubMed PMID: 11809823; PubMed Central PMCID:  
833 PMCPMC65073.
- 834 31. Geraldo S, Khanzada UK, Parsons M, Chilton JK, Gordon-Weeks PR. Targeting of the  
835 F-actin-binding protein drebrin by the microtubule plus-tip protein EB3 is required for  
836 neuritogenesis. *Nature Cell Biology*. 2008;10(10):1181-9. doi: 10.1038/ncb1778.
- 837 32. Newman LE, Zhou CJ, Mudigonda S, Mattheyses AL, Paradies E, Marobbio CM, et al.  
838 The ARL2 GTPase is required for mitochondrial morphology, motility, and maintenance of  
839 ATP levels. *PLoS One*. 2014;9(6):e99270. Epub 20140609. doi:  
840 10.1371/journal.pone.0099270. PubMed PMID: 24911211; PubMed Central PMCID:  
841 PMCPMC4050054.
- 842 33. Fong KW, Choi YK, Rattner JB, Qi RZ. CDK5RAP2 is a pericentriolar protein that  
843 functions in centrosomal attachment of the gamma-tubulin ring complex. *Mol Biol Cell*.  
844 2008;19(1):115-25. Epub 20071024. doi: 10.1091/mbc.e07-04-0371. PubMed PMID:  
845 17959831; PubMed Central PMCID: PMCPMC2174194.
- 846 34. Zhu W, Shenoy A, Kundrotas P, Elofsson A. Evaluation of AlphaFold-Multimer  
847 prediction on multi-chain protein complexes. *Bioinformatics*. 2023;39(7). doi:  
848 10.1093/bioinformatics/btad424.
- 849 35. Yu D, Chojnowski G, Rosenthal M, Kosinski J. AlphaPulldown-a python package for  
850 protein-protein interaction screens using AlphaFold-Multimer. *Bioinformatics*. 2023;39(1). doi:  
851 10.1093/bioinformatics/btac749. PubMed PMID: 36413069; PubMed Central PMCID:  
852 PMCPMC9805587.
- 853 36. Mirdita M, Schütze K, Moriwaki Y, Heo L, Ovchinnikov S, Steinegger M. ColabFold:  
854 making protein folding accessible to all. *Nature Methods*. 2022;19(6):679-82. doi:  
855 10.1038/s41592-022-01488-1.
- 856 37. Fredriksson S, Gullberg M, Jarvius J, Olsson C, Pietras K, Gustafsdottir SM, et al.  
857 Protein detection using proximity-dependent DNA ligation assays. *Nat Biotechnol*.  
858 2002;20(5):473-7. doi: 10.1038/nbt0502-473. PubMed PMID: 11981560.

- 859 38. Uzquiano A, Gladwyn-Ng I, Nguyen L, Reiner O, Götz M, Matsuzaki F, et al. Cortical  
860 progenitor biology: key features mediating proliferation versus differentiation. *J Neurochem*.  
861 2018;146(5):500-25. Epub 20180627. doi: 10.1111/jnc.14338. PubMed PMID: 29570795.
- 862 39. Konno D, Shioi G, Shitamukai A, Mori A, Kiyonari H, Miyata T, et al. Neuroepithelial  
863 progenitors undergo LGN-dependent planar divisions to maintain self-renewability during  
864 mammalian neurogenesis. *Nat Cell Biol*. 2008;10(1):93-101. Epub 20071216. doi:  
865 10.1038/ncb1673. PubMed PMID: 18084280.
- 866 40. Wright ZC, Loskutov Y, Murphy D, Stoilov P, Pugacheva E, Goldberg AFX, et al.  
867 ADP-Ribosylation Factor-Like 2 (ARL2) regulates cilia stability and development of outer  
868 segments in rod photoreceptor neurons. *Sci Rep*. 2018;8(1):16967. Epub 20181116. doi:  
869 10.1038/s41598-018-35395-3. PubMed PMID: 30446707; PubMed Central PMCID:  
870 PMC6240099.
- 871 41. Mitchell-Dick A, Chalem A, Pilaz LJ, Silver DL. Acute Lengthening of Progenitor  
872 Mitosis Influences Progeny Fate during Cortical Development in vivo. *Dev Neurosci*.  
873 2019;41(5-6):300-17. Epub 20200615. doi: 10.1159/000507113. PubMed PMID: 32541147;  
874 PubMed Central PMCID: PMC67388066.
- 875 42. Zhou Y, Jiang H, Gu J, Tang Y, Shen N, Jin Y. MicroRNA-195 targets ADP-  
876 ribosylation factor-like protein 2 to induce apoptosis in human embryonic stem cell-derived  
877 neural progenitor cells. *Cell Death & Disease*. 2013;4(6):e695-e. doi: 10.1038/cddis.2013.195.
- 878 43. Iwata R, Casimir P, Vanderhaeghen P. Mitochondrial dynamics in postmitotic cells  
879 regulate neurogenesis. *Science*. 2020;369(6505):858-62. doi: 10.1126/science.aba9760.  
880 PubMed PMID: 32792401.
- 881 44. Lizarraga SB, Margossian SP, Harris MH, Campagna DR, Han AP, Blevins S, et al.  
882 Cdk5rap2 regulates centrosome function and chromosome segregation in neuronal progenitors.  
883 *Development*. 2010;137(11):1907-17. doi: 10.1242/dev.040410. PubMed PMID: 20460369;  
884 PubMed Central PMCID: PMC2867323.
- 885 45. Paridaen JT, Wilsch-Bräuninger M, Huttner WB. Asymmetric inheritance of  
886 centrosome-associated primary cilium membrane directs ciliogenesis after cell division. *Cell*.  
887 2013;155(2):333-44. doi: 10.1016/j.cell.2013.08.060. PubMed PMID: 24120134.
- 888 46. Schmechel DE, Rakic P. A Golgi study of radial glial cells in developing monkey  
889 telencephalon: morphogenesis and transformation into astrocytes. *Anat Embryol (Berl)*.  
890 1979;156(2):115-52. doi: 10.1007/bf00300010. PubMed PMID: 111580.
- 891 47. Coquand L, Victoria GS, Tata A, Carpentieri JA, Brault JB, Guimiot F, et al.  
892 CAMSAPs organize an acentrosomal microtubule network from basal varicosities in radial

- 893 glial cells. *J Cell Biol.* 2021;220(8). Epub 20210521. doi: 10.1083/jcb.202003151. PubMed  
894 PMID: 34019079; PubMed Central PMCID: PMCPMC8144914.
- 895 48. Issa L, Mueller K, Seufert K, Kraemer N, Rosenkotter H, Ninnemann O, et al. Clinical  
896 and cellular features in patients with primary autosomal recessive microcephaly and a novel  
897 CDK5RAP2 mutation. *Orphanet Journal of Rare Diseases.* 2013;8(1):59. doi: 10.1186/1750-  
898 1172-8-59.
- 899 49. Cai XB, Wu KC, Zhang X, Lv JN, Jin GH, Xiang L, et al. Whole-exome sequencing  
900 identified ARL2 as a novel candidate gene for MRCS (microcornea, rod-cone dystrophy,  
901 cataract, and posterior staphyloma) syndrome. *Clin Genet.* 2019;96(1):61-71. Epub 20190422.  
902 doi: 10.1111/cge.13541. PubMed PMID: 30945270.
- 903 50. Gerstner CD, Reed M, Dahl TM, Ying G, Frederick JM, Baehr W. Arf-like Protein 2  
904 (ARL2) Controls Microtubule Neogenesis during Early Postnatal Photoreceptor Development.  
905 *Cells.* 2022;12(1). Epub 20221230. doi: 10.3390/cells12010147. PubMed PMID: 36611941;  
906 PubMed Central PMCID: PMCPMC9818799.
- 907 51. Zaqout S, Ravindran E, Stoltenburg-Didinger G, Kaindl AM. Congenital  
908 microcephaly-linked CDK5RAP2 affects eye development. *Ann Hum Genet.* 2020;84(1):87-  
909 91. Epub 20190729. doi: 10.1111/ahg.12343. PubMed PMID: 31355417.
- 910 52. Lois C, Hong EJ, Pease S, Brown EJ, Baltimore D. Germline transmission and tissue-  
911 specific expression of transgenes delivered by lentiviral vectors. *Science.* 2002;295(5556):868-  
912 72. Epub 20020110. doi: 10.1126/science.1067081. PubMed PMID: 11786607.
- 913 53. Rompani SB, Cepko CL. Retinal progenitor cells can produce restricted subsets of  
914 horizontal cells. *Proceedings of the National Academy of Sciences.* 2008;105(1):192-7. doi:  
915 doi:10.1073/pnas.0709979104.
- 916 54. Shyu YJ, Liu H, Deng X, Hu CD. Identification of new fluorescent protein fragments  
917 for bimolecular fluorescence complementation analysis under physiological conditions.  
918 *Biotechniques.* 2006;40(1):61-6. doi: 10.2144/000112036. PubMed PMID: 16454041.
- 919 55. Kodama Y, Hu CD. An improved bimolecular fluorescence complementation assay  
920 with a high signal-to-noise ratio. *Biotechniques.* 2010;49(5):793-805. doi: 10.2144/000113519.  
921 PubMed PMID: 21091444.
- 922 56. Ma D, Yoon S-I, Yang C-H, Marcy G, Zhao N, Leong W-Y, et al. Rescue of Methyl-  
923 CpG Binding Protein 2 Dysfunction-induced Defects in Newborn Neurons by Pentobarbital.  
924 *Neurotherapeutics.* 2015;12(2):477-90. doi: 10.1007/s13311-015-0343-0.
- 925 57. Meyer-Dilhet G, Courchet J. In Utero Cortical Electroporation of Plasmids in the  
926 Mouse Embryo. *STAR Protoc.* 2020;1(1):100027. Epub 20200619. doi:

927 10.1016/j.xpro.2020.100027. PubMed PMID: 32685931; PubMed Central PMCID:  
928 PMCPMC7357676.

929 58. Gujar MR, Gao Y, Teng X, Deng Q, Lin KY, Tan YS, et al. Golgi-dependent  
930 reactivation and regeneration of *Drosophila* quiescent neural stem cells. *Dev Cell*.  
931 2023;58(19):1933-49 e5. Epub 20230810. doi: 10.1016/j.devcel.2023.07.010. PubMed PMID:  
932 37567172.

933 59. Evans R, O'Neill M, Pritzel A, Antropova N, Senior A, Green T, et al. Protein complex  
934 prediction with AlphaFold-Multimer. *bioRxiv*. 2022:2021.10.04.463034. doi:  
935 10.1101/2021.10.04.463034.

936 60. Deng Q, Wang C, Koe CT, Heinen JP, Tan YS, Li S, et al. Parafibromin governs cell  
937 polarity and centrosome assembly in *Drosophila* neural stem cells. *PLoS Biol*.  
938 2022;20(10):e3001834. Epub 20221012. doi: 10.1371/journal.pbio.3001834. PubMed PMID:  
939 36223339; PubMed Central PMCID: PMCPMC9555638.

940 61. Jakobs MAH, Dimitracopoulos A, Franze K. KymoButler, a deep learning software for  
941 automated kymograph analysis. *eLife*. 2019;8:e42288. doi: 10.7554/eLife.42288.

942

943

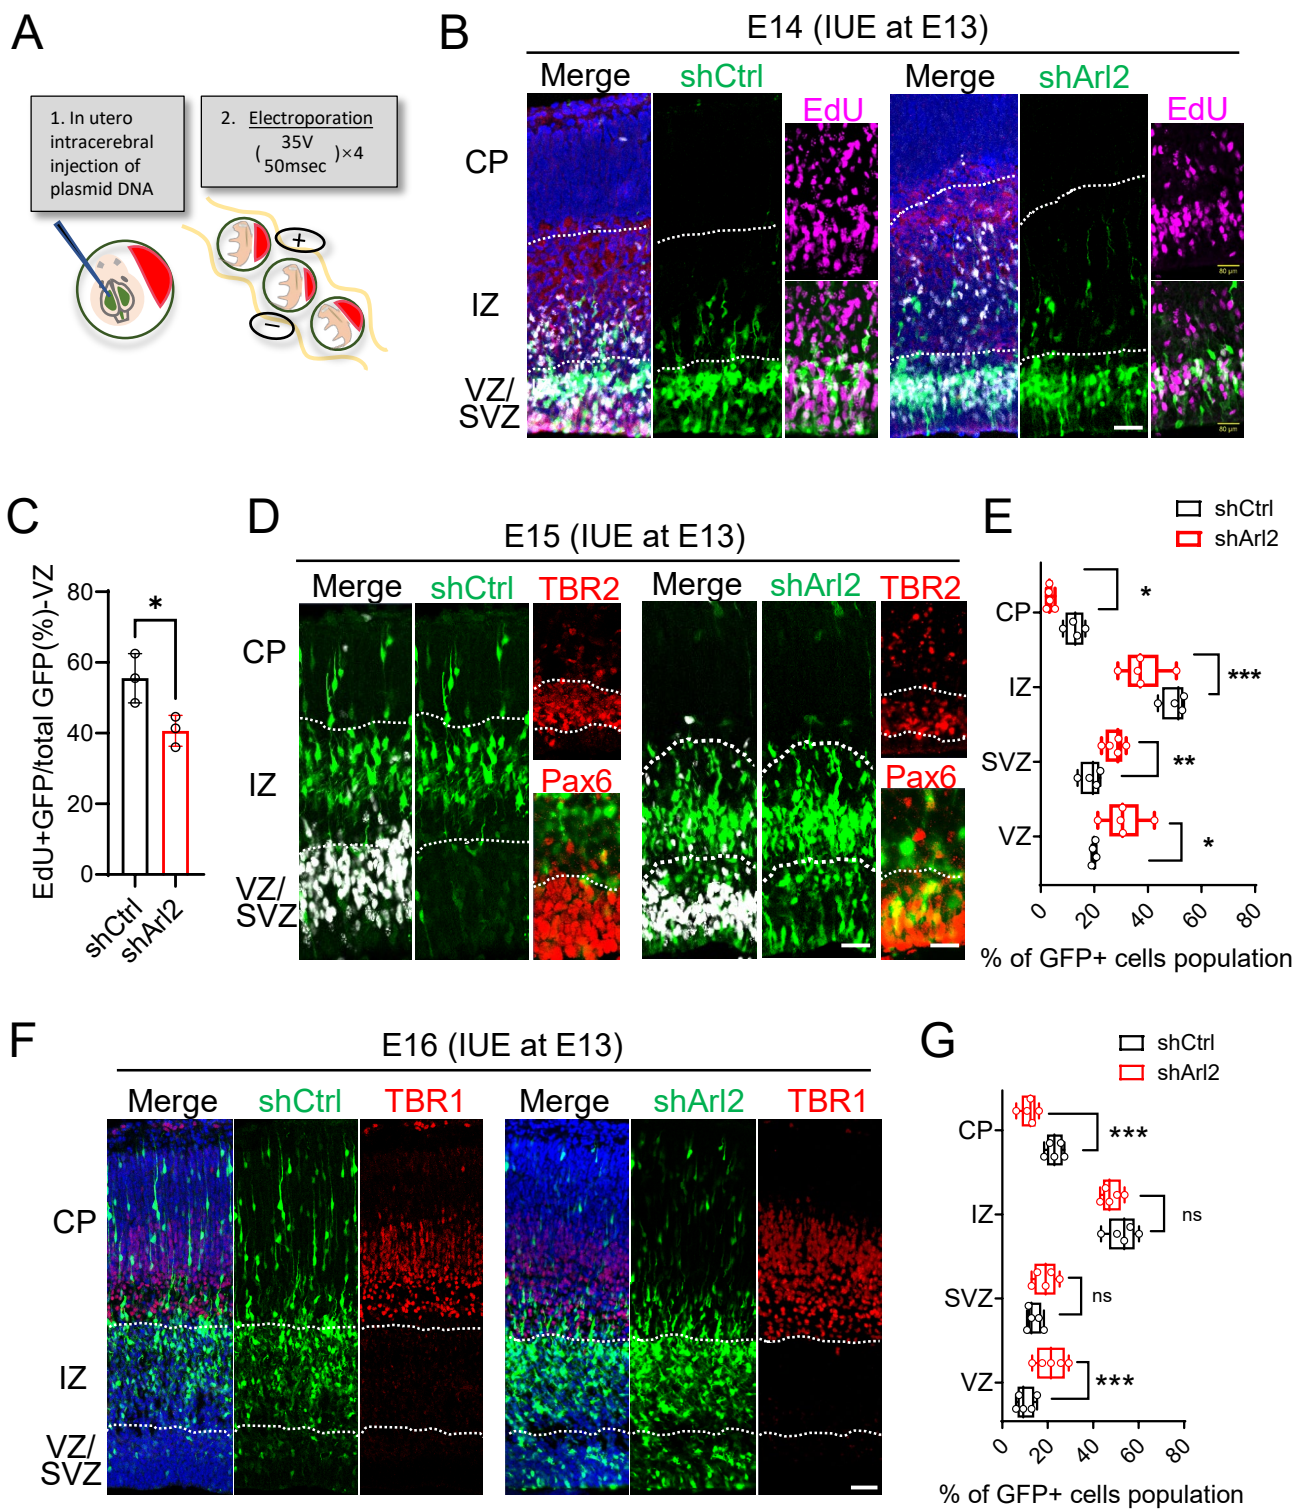

**Figure 1**

## Figure legends

### Fig. 1 Arl2 knockdown results in a reduction in mNPC proliferation and neuronal migration

(A) Schematic representation of in-utero electroporation (IUE). (B) EdU labelling by ClickiT® EdU Imaging Kits. Brain slices from shCtrl (scrambled control) and shArl2 (Arl2 shRNA) groups at E14, one day after IUE, were labelled with EdU and GFP. (C) Bar graph showing reduced EdU incorporation upon Arl2 knockdown ( $40.66 \pm 4.35\%$  in shArl2 vs  $55.54 \pm 6.96\%$  in shCtrl). The values represent the mean  $\pm$  s.d. ( $n = 3$  embryos). Student's t-test, differences were considered significant at  $*p < 0.05$ . (D) Cortical brain sections from shCtrl and shArl2 groups at E15, two days after IUE, were labelled with TBR2 (intermediate neural progenitor marker and labelling SVZ) or Pax6 (radial glia marker and labelling VZ) with GFP. (E) Box plots representing GFP+ cells in CP (shctrl:  $12.68 \pm 3.47\%$ , shArl2:  $3.42 \pm 1.17\%$ ), IZ (shctrl:  $49.99 \pm 4.42\%$ , shArl2:  $38.00 \pm 7.91\%$ ), SVZ (shctrl:  $18.76 \pm 3.71\%$ , shArl2:  $27.64 \pm 3.53\%$ ) & VZ (shctrl:  $19.92 \pm 0.87\%$ , shArl2:  $30.94 \pm 7.51\%$ ) showing defects in neuronal migration to CP upon Arl2 Knockdown compared to the control. The values represent the mean  $\pm$  s.d. (shCtrl,  $n = 4$  embryos; shArl2,  $n = 5$  embryos). Multiple unpaired t tests, differences were considered significant at  $**p < 0.05$ ,  $***p < 0.001$  and  $****p < 0.0001$ . (F) Cortical brain sections for shCtrl and shArl2 groups at E16, three days after IUE, were immunolabelled with TBR1 (immature neuron marker and labelling CP) and GFP. (G) Box plots representing GFP+ cells in CP (shctrl:  $23.07 \pm 3.61\%$ , shArl2:  $11.75 \pm 3.67\%$ ), IZ (shctrl:  $52.82 \pm 6.31\%$ , shArl2:  $48.00 \pm 4.24\%$ ), SVZ (shctrl:  $13.94 \pm 3.15\%$ , shArl2:  $18.82 \pm 4.90\%$ ) & VZ (shctrl:  $10.17 \pm 3.85\%$ , shArl2:  $21.42 \pm 6.38\%$ ) showing defects in neuronal migration to CP upon Arl2 Knockdown compared to the control. The values represent the mean  $\pm$  s.d. (shCtrl,  $n = 5$  embryos; shArl2,  $n = 5$  embryos). Multiple unpaired t tests, differences were



considered significant at  $**p < 0.05$  and  $***p < 0.0001$ . ns = non-significance. Scale bars; B and D = 50  $\mu\text{m}$ , F = 80  $\mu\text{m}$ .



## Fig 2. Overexpression various forms of Arl2 alters neuronal migration

(A) Cortical brain sections following overexpression of human Arl2<sup>WT</sup> (hArl2<sup>WT</sup>), mouse Arl2<sup>WT</sup> (mArl2<sup>WT</sup>) and mouse Arl2<sup>K71R</sup> at E16, three days after IUE, were labelled with tdTomato (Td).

(B) Cortical brain sections following overexpression of Arl2<sup>WT</sup>, the dominant-negative form (Arl2<sup>T30N</sup>) and the dominant-active form (Arl2<sup>Q70L</sup>) at E16, three days after IUE, were immunolabelled with tdTomato (Td) and TBR1 (immature neuron marker and labelling CP).

Bar graphs (images in A) representing Td+ cell population in the group of control (VZ=13.23 ± 1.85%, SVZ=19.47 ± 3.19%, IZ=45.92 ± 5.44%, CP=21.39 ± 1.58%, n = 4 embryos), human Arl2<sup>WT</sup> (hArl2<sup>WT</sup>) (VZ=11.13 ± 1.90%, SVZ=18.21 ± 1.98%, IZ=40.25 ± 1.14%, CP=30.41 ± 2.66%, n = 4 embryos), mouse Arl2<sup>WT</sup> (mArl2<sup>WT</sup>) (VZ=13.92 ± 2.44%, SVZ=20.69 ± 1.70%, IZ=36.09 ± 3.69%, CP=29.30 ± 5.07%, n = 3 embryos) and Arl2<sup>K71R</sup> mutant (VZ=11.01 ± 3.05%, SVZ=17.18 ± 2.20%, IZ=38.89 ± 1.22%, CP=32.92 ± 6.29%, n = 3 embryos).

(D) Bar graphs (images in B) representing Td+ cell population in the group of control (VZ=14.23 ± 2.15%, SVZ=20.15 ± 2.25%, IZ=39.63 ± 3.28%, CP=25.99 ± 4.64%, n = 4 embryos), Arl2<sup>WT</sup> (VZ=11.13 ± 1.90%, SVZ=18.21 ± 1.98%, IZ=40.25 ± 1.14%, CP=30.41 ± 2.66%, n = 4 embryos), dominant-negative form (Arl2<sup>T30N</sup>) (VZ=15.23 ± 3.51%, SVZ=19.34 ± 2.89%, IZ=65.43 ± 3.78%, CP=0.00 ± 0.00%, n = 4 embryos) and dominant-active form (Arl2<sup>Q70L</sup>) (VZ=15.68 ± 2.44%, SVZ=20.80 ± 1.84%, IZ=63.53 ± 2.86%, CP=0.00 ± 0.00%, n = 4 embryos).

(E) Cortical brain sections following overexpression of the dominant-active form (Arl2<sup>Q70L</sup>) at E18, five days after IUE, were immunolabelled with tdTomato (Td) and TBR2 is intermediate progenitor cells marker. TBR1 is immature neuron marker.

(F) Quantification graphs representing TBR2+Td+ cells population in the group of control (7.56 ± 0.84%) and Arl2<sup>Q70L</sup> mutants (42.11 ± 3.45%) in the IZ.

(G) Quantification graphs representing TBR1+Td+ cells population in the group of control (8.17 ±

2.59%) and *Arl2<sup>Q70L</sup>* mutants ( $42.91 \pm 2.48\%$ ) in the IZ. The values represent the mean  $\pm$  s.d.. Two-Way ANOVA with Multiple comparisons in C and D; Student's t-test in F and G, n = 3 embryos. Differences were considered significant at \* $p < 0.05$ , \*\* $p < 0.01$ , \*\*\* $p < 0.001$  and \*\*\*\* $p < 0.0001$ , ns = non-significance. Scale bars; A, B and E = 80  $\mu\text{m}$ , Boxed image for E = 50  $\mu\text{m}$ .

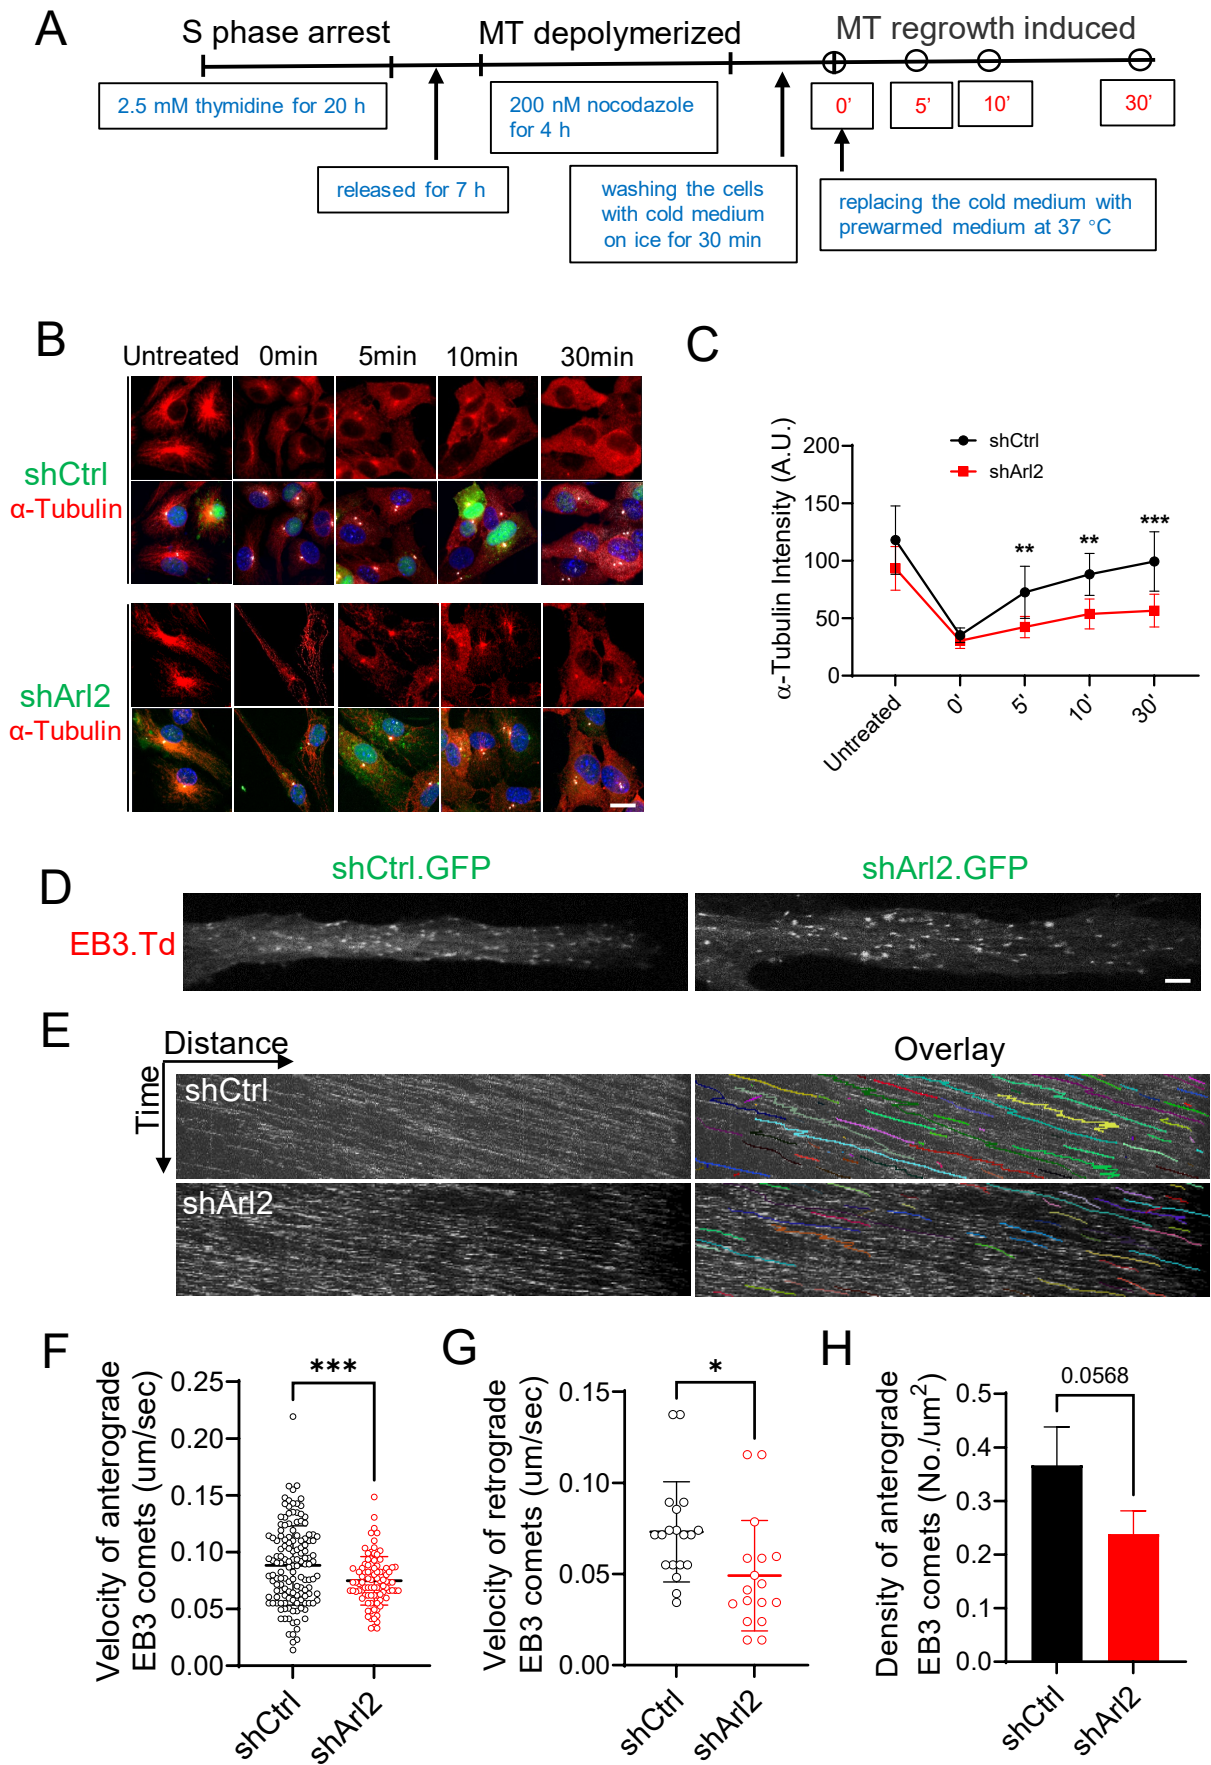

**Figure 3**

**Fig. 3 Loss of Arl2 results in a significant reduction of centrosomal microtubule growth in mNPCs *in vitro***

(A) Schematic representation of centrosomal microtubule regrowth assay. (B) Immunostaining micrographs showing the microtubule regrowth labelled by  $\alpha$ -tubulin within the time course (0, 5, 10, and 30 min) in both shCtrl and shArl2 groups. (C) Line graph representing  $\alpha$ -tubulin intensity in shArl2 group (Untreated =  $97.9 \pm 26.30$ , 0 min =  $31.63 \pm 7.26$ , 5 min =  $39.47 \pm 9.78$ , 10 min =  $67.50 \pm 12.87$ , and 30 min =  $71.63 \pm 12.48$ ) compared to the control (Untreated =  $122.70 \pm 27.32$ , 0 min =  $30.21 \pm 9.20$ , 5 min =  $68.27 \pm 18.19$ , 10 min =  $95.96 \pm 18.40$ , and 30 min =  $110.87 \pm 18.38$ ), (Unit = A.U.). The values represent the mean  $\pm$  s.d.. Multiple t-test in C, n = 3. Differences were considered significant at  $**p < 0.01$ ,  $***p < 0.001$ . (D) Live imaging micrograph to track the growing ends of microtubules by using the plus-end microtubule binding protein EB3 tagged with Tdtomato (Td) in mNPCs in both shCtrl and shArl2 groups. (E) Kymographs showing the EB3-Td comets movement in mNPCs in both shCtrl and shArl2 groups. (F, G & H) Quantification graphs representing the velocity of anterograde EB3 comets (shCtrl:  $0.09 \pm 0.03$   $\mu\text{m}/\text{sec}$  vs shArl2:  $0.07 \pm 0.02$   $\mu\text{m}/\text{sec}$ ), the velocity of retrograde EB3 comets (shCtrl:  $0.07 \pm 0.03$   $\mu\text{m}/\text{sec}$  vs shArl2:  $0.05 \pm 0.03$   $\mu\text{m}/\text{sec}$ ) and the total density of EB3 comets (shCtrl:  $0.30 \pm 0.05$  No./ $\mu\text{m}^2$  vs shArl2:  $0.24 \pm 0.04$  No./ $\mu\text{m}^2$ ). The values represent the mean  $\pm$  s.d.. Student's t-test in F, G and H, n = 3. Differences were considered significant at  $*p < 0.05$ ,  $***p < 0.001$ . Scale bars; B = 10  $\mu\text{m}$ , D = 1  $\mu\text{m}$ .

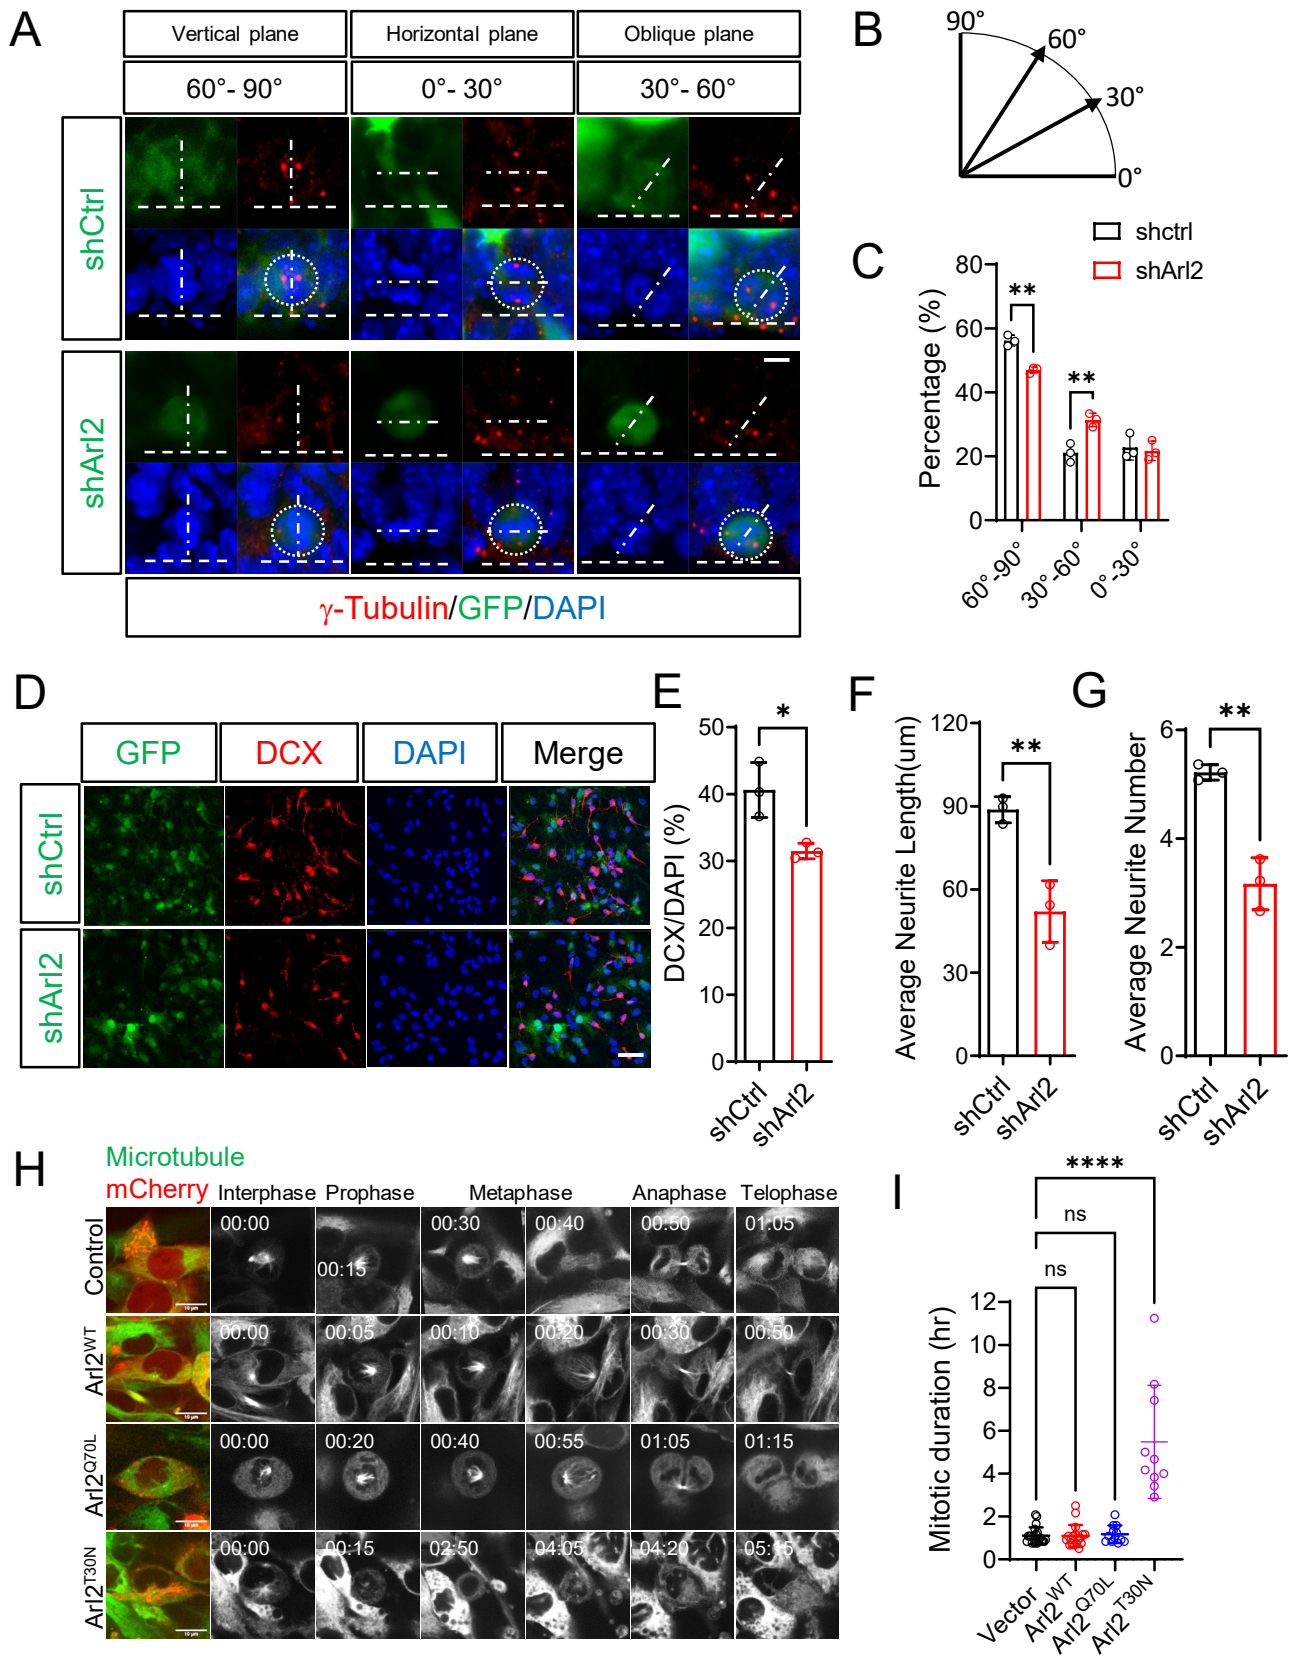

**Figure 4**

**Fig.4 Loss of Arl2 led to a shift in symmetric division to asymmetric division of mNPCs and alters the mNPC differentiation**

(A & B) Immunostaining micrographs showing transition from symmetric to asymmetric cell division (brain section) after 2 days IUE. The centrosome of mitotic cells was labelled using antibodies against  $\gamma$ -Tubulin which organize the mitotic spindle. The orientation of the mitotic centrosome at the cleavage furrow relative to the brain ventricular surface (horizontal dash line) was determined. The symmetric division was determined by the vertical cleavage plain ( $60^{\circ}$ - $90^{\circ}$ ), and the asymmetric division was determined by the horizontal cleavage plain ( $0^{\circ}$ - $30^{\circ}$ ) and oblique cleavage plain ( $30^{\circ}$ - $60^{\circ}$ ). (C) Bar graph representing the population of radial glial cells to divide with horizontal cleavage plain ( $0^{\circ}$ - $30^{\circ}$  =  $21.70 \pm 3.03\%$ ), oblique cleavage plain ( $30^{\circ}$ - $60^{\circ}$  =  $31.36 \pm 2.09\%$ ) and vertical cleavage plain ( $60^{\circ}$ - $90^{\circ}$  =  $46.94 \pm 0.97\%$ ) in shArl2 group as compared to control ( $0^{\circ}$ - $30^{\circ}$  =  $22.78 \pm 3.93\%$ ,  $30^{\circ}$ - $60^{\circ}$  =  $21.08 \pm 2.91\%$  and  $60^{\circ}$ - $90^{\circ}$  =  $56.15 \pm 1.68\%$ ). The values represent the mean  $\pm$  s.d.. Multiple t-test in C, n = 3. Differences were considered significant at  $**p < 0.01$ . (D) Immunostaining micrographs showing the DCX+ immature neurons after 5 days mNPC differentiation assay in both shCtrl and shArl2 groups. (E, F & G) Bar graphs representing the population of DCX-positive cells (shCtrl:  $40.63 \pm 4.11\%$ , shArl2:  $31.48 \pm 1.72\%$ ); the average neurite length (shCtrl:  $88.88 \pm 4.69 \mu\text{m}$ , shArl2:  $53.60 \pm 11.91 \mu\text{m}$ ) and the average neurite number (shCtrl:  $5.22 \pm 0.14$ , shArl2:  $3.27 \pm 0.52$ ). The values represent the mean  $\pm$  s.d.. Student's t-test in F, G and H, n = 3. Differences were considered significant at  $*p < 0.05$ ,  $**p < 0.01$ . (H) Time series of mNPCs *in vitro* using Viafluor-488 live cell microtubule staining kit (Biotium, #70062) in Arl2<sup>WT</sup>, Arl2<sup>Q70L</sup> and Arl2<sup>T30N</sup>. (I) Quantification graph showing the average time taken for a single mitotic cycle in control =  $1.10 \pm 0.39$  hours, Arl2<sup>WT</sup> =  $1.09 \pm 0.51$  hours, Arl2<sup>Q70L</sup> =  $1.17 \pm 0.41$



hours,  $\text{Arl2}^{\text{T30N}} = 5.48 \pm 2.64$  hours in mNPCs overexpressing  $\text{Arl2}^{\text{WT}}$ ,  $\text{Arl2}^{\text{Q70L}}$  and  $\text{Arl2}^{\text{T30N}}$ .

Scale bars; A = 5  $\mu\text{m}$ ; D = 50  $\mu\text{m}$ ; H = 10  $\mu\text{m}$ .

A

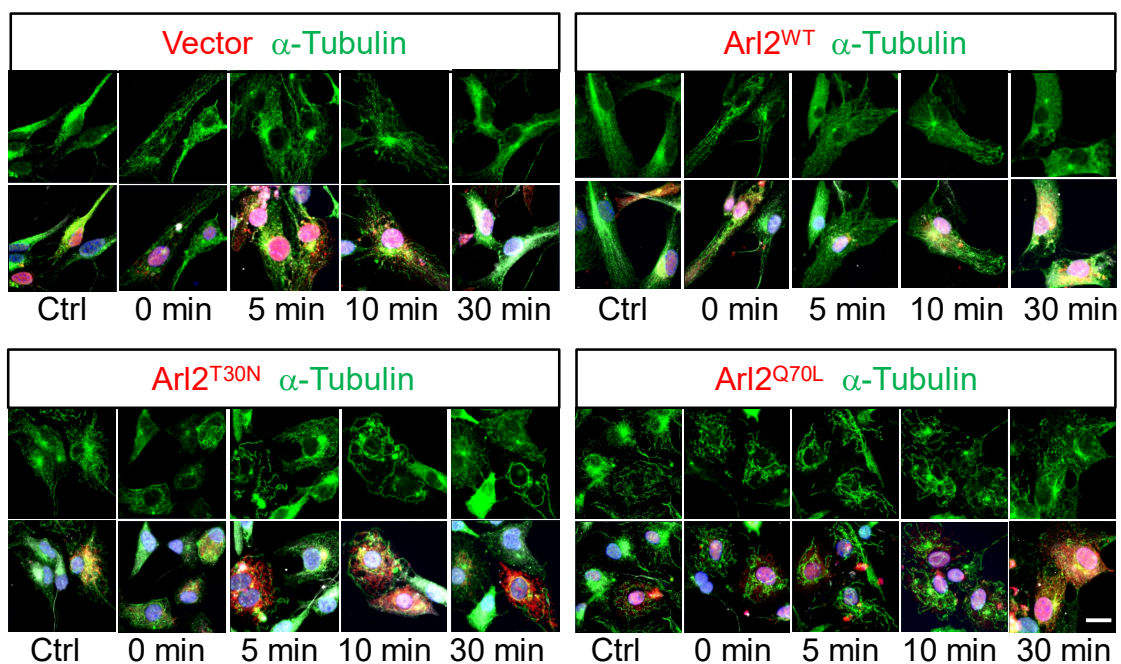

B

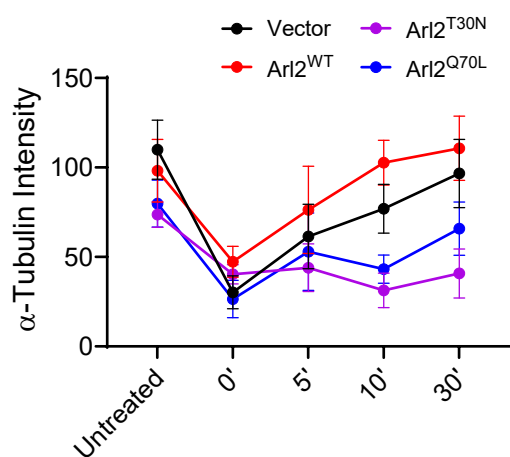

C

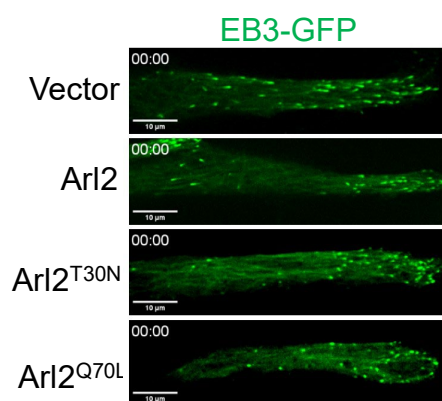

D

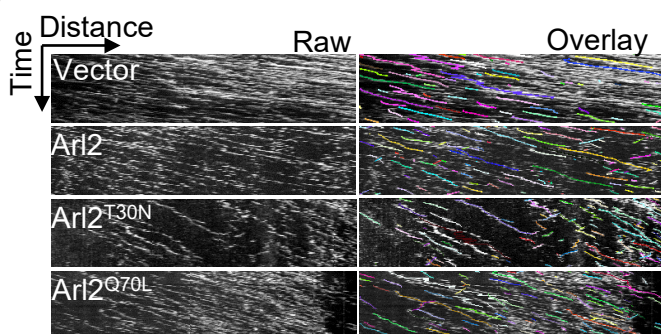

E

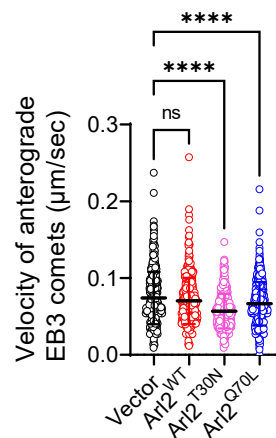

F

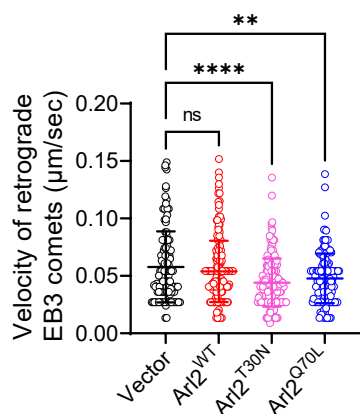

G

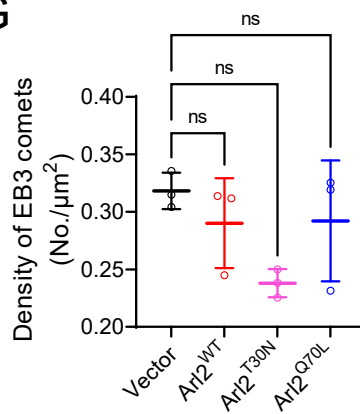

Figure 5

**Fig. 5 Overexpression of mutant forms of Arl2 leads to defects in microtubule growth in mNPCs**

(A) Immunostaining micrographs showing microtubule regrowth labelled by  $\alpha$ -tubulin within the time course (0, 5, 10, and 30 min) in Arl2<sup>WT</sup>, Arl2<sup>T30N</sup> and Arl2<sup>Q70L</sup> groups in mNPCs. (B) Line graph representing  $\alpha$ -tubulin intensity in Arl2<sup>WT</sup> group (Untreated = 98.22  $\pm$  17.51, 0 min = 47.30  $\pm$  8.64, 5 min = 76.31  $\pm$  24.34, 10 min = 102.69  $\pm$  12.52, and 30 min = 110.74  $\pm$  17.96), Arl2<sup>T30N</sup> group (Untreated = 73.65  $\pm$  7.14, 0 min = 40.34  $\pm$  5.38, 5 min = 43.97  $\pm$  13.29, 10 min = 31.33  $\pm$  9.64, and 30 min = 40.75  $\pm$  13.64), Arl2<sup>Q70L</sup> group (Untreated = 79.76  $\pm$  13.13, 0 min = 26.45  $\pm$  10.44, 5 min = 52.94  $\pm$  21.58, 10 min = 43.20  $\pm$  7.83, and 30 min = 65.82  $\pm$  14.84) compared to the control (Untreated = 109.90  $\pm$  16.48, 0 min = 30.21  $\pm$  9.20, 5 min = 61.40  $\pm$  18.00, 10 min = 76.94  $\pm$  13.60, and 30 min = 96.65  $\pm$  19.09) in mNPCs. The values represent the mean  $\pm$  s.d., Unit = A.U.. Two-Way ANOVA with Multiple comparisons in B, n = 3. Differences were considered significant at \*p<0.05, \*\*p<0.01, \*\*\*p<0.001 and \*\*\*\*p<0.0001, ns = non-significance. (C) Live imaging micrograph to track the growing ends of microtubules by using the plus-end microtubule binding protein EB3 tagged with GFP in mNPCs in Arl2<sup>WT</sup>, Arl2<sup>T30N</sup> and Arl2<sup>Q70L</sup> groups. (D) Kymographs showing the EB3-GFP comets movement in mNPCs in Arl2<sup>WT</sup>, Arl2<sup>T30N</sup> and Arl2<sup>Q70L</sup> groups. (E, F & G) Quantification graphs representing the velocity of anterograde EB3 comets (Control: 0.074  $\pm$  0.034  $\mu$ m/sec, Arl2<sup>WT</sup>: 0.070  $\pm$  0.03  $\mu$ m/sec; Arl2<sup>T30N</sup>: 0.057  $\pm$  0.022  $\mu$ m/sec and Arl2<sup>Q70L</sup>: 0.067  $\pm$  0.028  $\mu$ m/sec), the velocity of retrograde EB3 comets (Control: 0.058  $\pm$  0.031  $\mu$ m/sec, Arl2<sup>WT</sup>: 0.054  $\pm$  0.027  $\mu$ m/sec; Arl2<sup>T30N</sup>: 0.044  $\pm$  0.021  $\mu$ m/sec and Arl2<sup>Q70L</sup>: 0.048  $\pm$  0.021  $\mu$ m/sec) and the total density of EB3 comets (Control: 0.32  $\pm$  0.02 No./ $\mu$ m<sup>2</sup>, Arl2<sup>WT</sup>: 0.29  $\pm$  0.04 No./ $\mu$ m<sup>2</sup>; Arl2<sup>T30N</sup>: 0.24  $\pm$  0.01 No./ $\mu$ m<sup>2</sup> and Arl2<sup>Q70L</sup>: 0.29  $\pm$  0.05 No./ $\mu$ m<sup>2</sup>, n = 3). The values represent the mean  $\pm$  s.d.. One-Way ANOVA in E, F and G.

Differences were considered significant at \*\* $p < 0.01$  and \*\*\*\* $p < 0.0001$ , ns = non-significance.

Scale bars; A = 5  $\mu\text{m}$ ; C = 10  $\mu\text{m}$ .

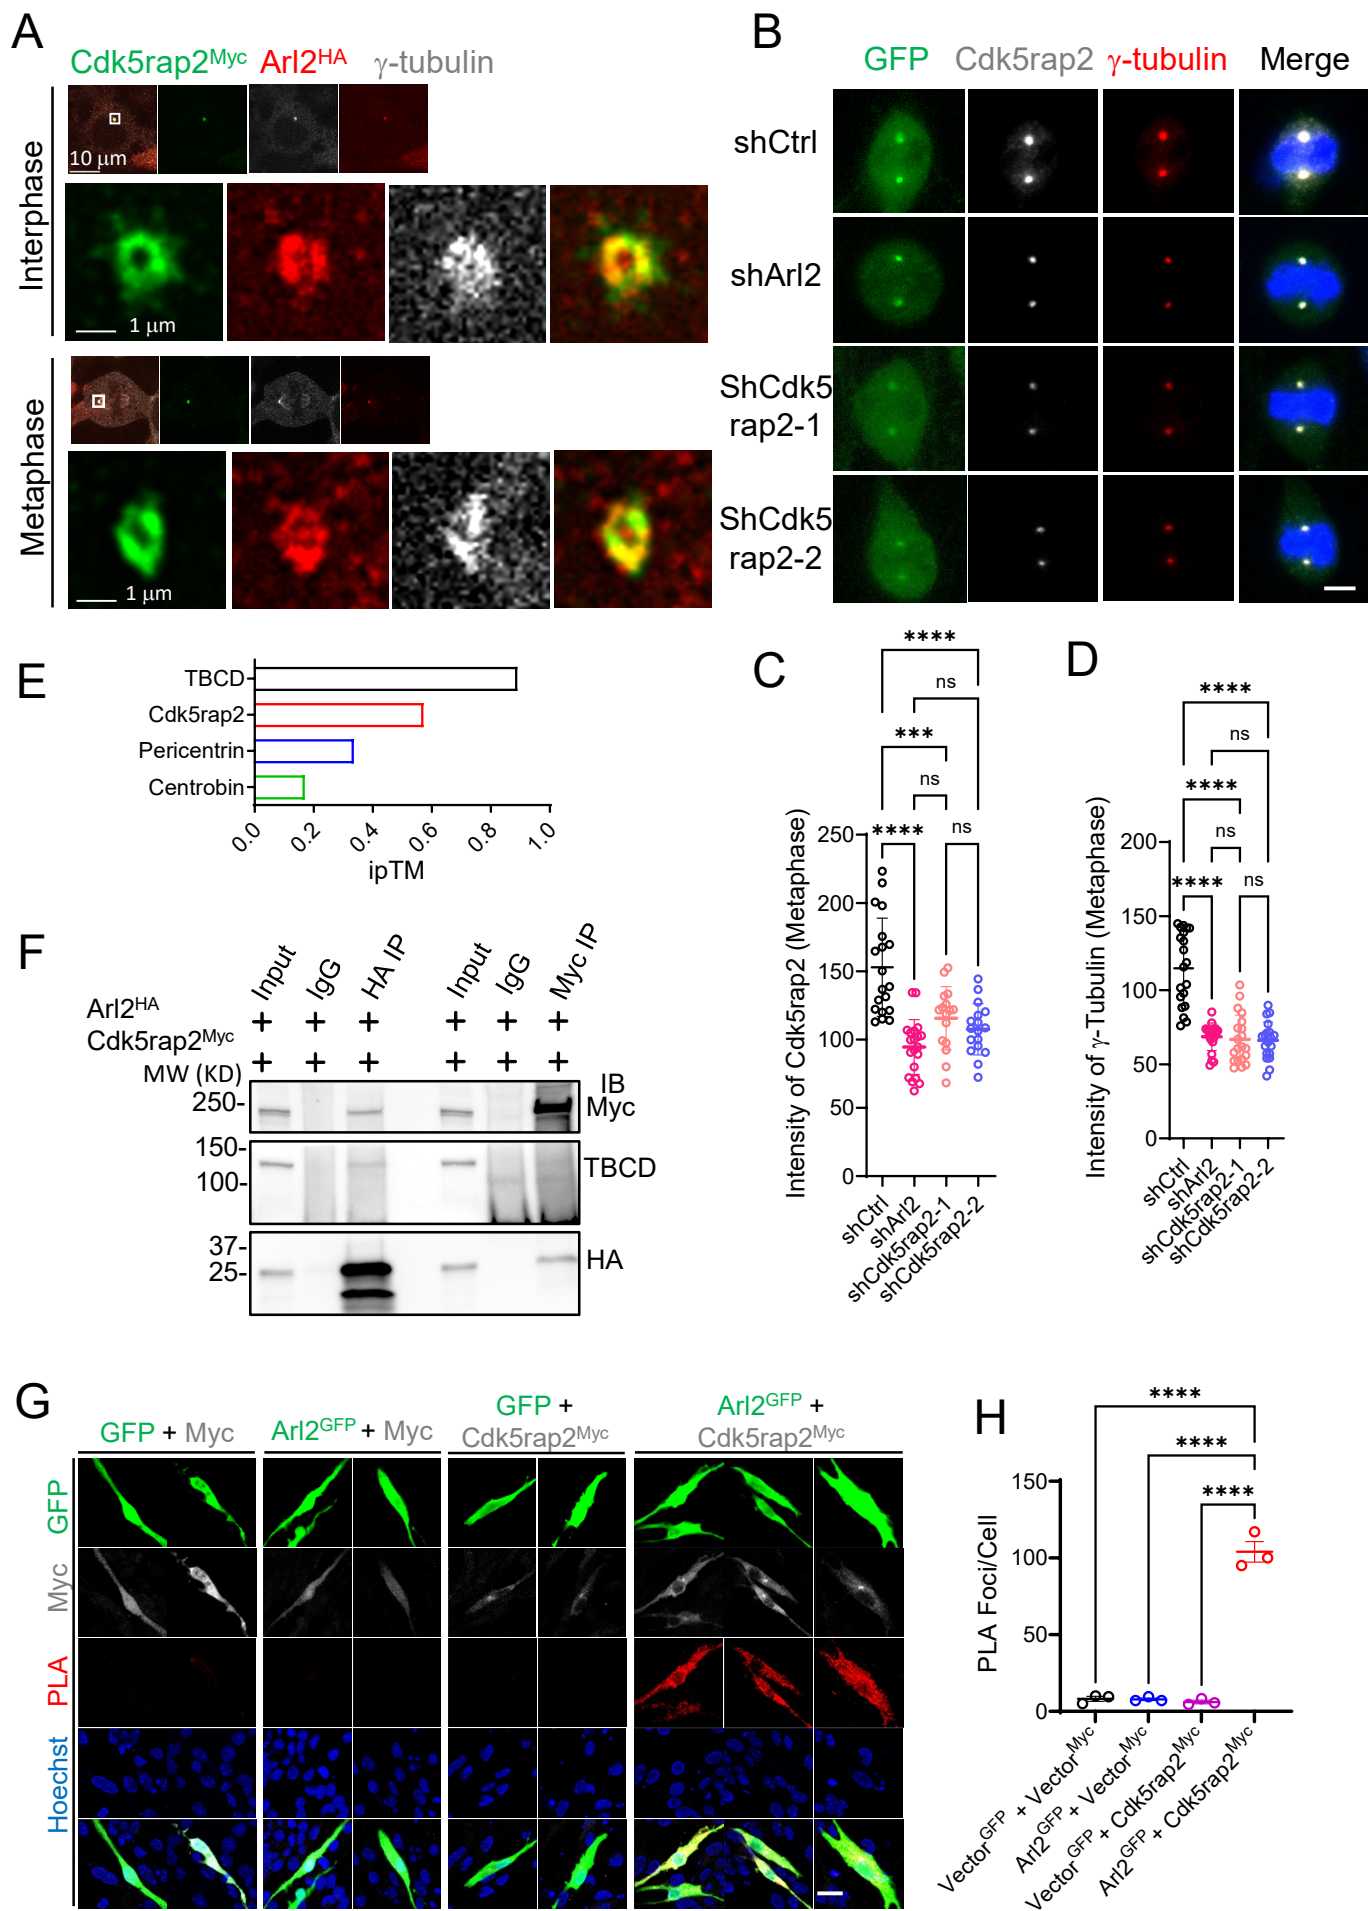

**Figure 6**

**Fig. 6 Arl2 localizes to the centrosomes and is required for  $\gamma$ -tubulin localization at the centrosomes in mNPCs**

(A) Immunostaining micrographs of HEK293 cells co-transfected with Arl2-HA and Cdk5rap2-Myc were imaged using super resolution microscopy labelled for  $\gamma$ -tubulin, Myc, and HA. (B) Immunostaining micrographs showing Cdk5rap2 and  $\gamma$ -tubulin in shCtrl, shArl2 and shCdk5rap2 groups in mNPCs. (C) Quantification graph showing Cdk5rap2 intensity at metaphase of mNPCs ( $94.5 \pm 20.06$ , n = 3 batches with 20 cells) upon Arl2 knockdown and (shCdk5rap2-1 =  $115.6 \pm 23.13$ , n = 3 batches with 16 cells; shCdk5rap2-2 =  $107.5 \pm 18.77$ , n = 3 batches with 17 cells) upon Cdk5rap2 knockdown as compared to shCtrl ( $153.0 \pm 35.96$ , n = 3 batches with 19 cells). (D) Quantification graph showing  $\gamma$ -tubulin intensity at metaphase of mNPCs ( $68.59 \pm 9.31$ , n = 3 batches with 20 cells) upon Arl2 knockdown and (shCdk5rap2-1 =  $66.85 \pm 16.44$ , n = 3 batches with 20 cells; shCdk5rap2-2 =  $66.11 \pm 12.33$ , n = 3 batches with 20 cells) upon Cdk5rap2 knockdown as compared to shCtrl ( $114.9 \pm 24.88$ , n = 3 batches with 20 cells). The values represent the mean  $\pm$  s.d.. One-Way ANOVA in C and D. Differences were considered significant at \*\*\*p<0.001 and \*\*\*\*p<0.0001, ns = non-significance. (E) Bar graph showing Alpha fold multimer interaction prediction of Arl2 and Cdk5rap2, Arl2 and Pericentrin (PCNT), Arl2 and Centrobin with an ipTM score of 0.57, 0.34, 0.17, respectively, compared with Tubulin folding cofactor D (TBCD), a known interactor of Arl2 with an ipTM score of 0.89. (F) Co-immunoprecipitation by over-expressing Arl2 (HA-Arl2) and Cdk5rap2 (Myc-Cdk5rap2) in HEK293 cells. Following precipitation with a HA antibody, the resulting protein complexes exhibited an anticipated 37 kD band corresponding to HA-Arl2 as well as 250 kD band corresponding to Myc-Cdk5rap2. TBCD was used as positive control which also co-immunoprecipitated following precipitation with a HA antibody. Similarly, following

precipitation with Myc antibody, bands corresponding Myc-Cdk5rap2 and HA-Arl2 were observed. (G) Proximity Ligation Assay (PLA) showing over-expressing Arl2 (Arl2-GFP) and Cdk5rap2 (Myc-Cdk5rap2) (Vector-GFP and Myc-Vector, Arl2-GFP and Myc-Vector, Vector-GFP and Myc-Cdk5rap2, Arl2-GFP and Myc-Cdk5rap2) in mNPCs. (H) Quantification graph of the PLA foci per cell with no red dot, weak red dots, and strong red dots for (G). Vector-GFP and Myc-Vector,  $8.17 \pm 2.75$ ; Arl2-GFP and Myc-Vector,  $7.83 \pm 1.44$ ; Vector-GFP and Myc-Cdk5rap2,  $6.11 \pm 1.99$ ; Arl2-GFP and Myc-Cdk5rap2,  $104.00 \pm 11.53$ ;  $n = 3$ ). The values represent the mean  $\pm$  s.d.. One-Way ANOVA in H. Differences were considered significant at \*\*\*\* $p < 0.0001$ . Scale bars; A = 10  $\mu\text{m}$ ; Boxed image for A = 1  $\mu\text{m}$ ; B = 5  $\mu\text{m}$ ; G = 40  $\mu\text{m}$ .

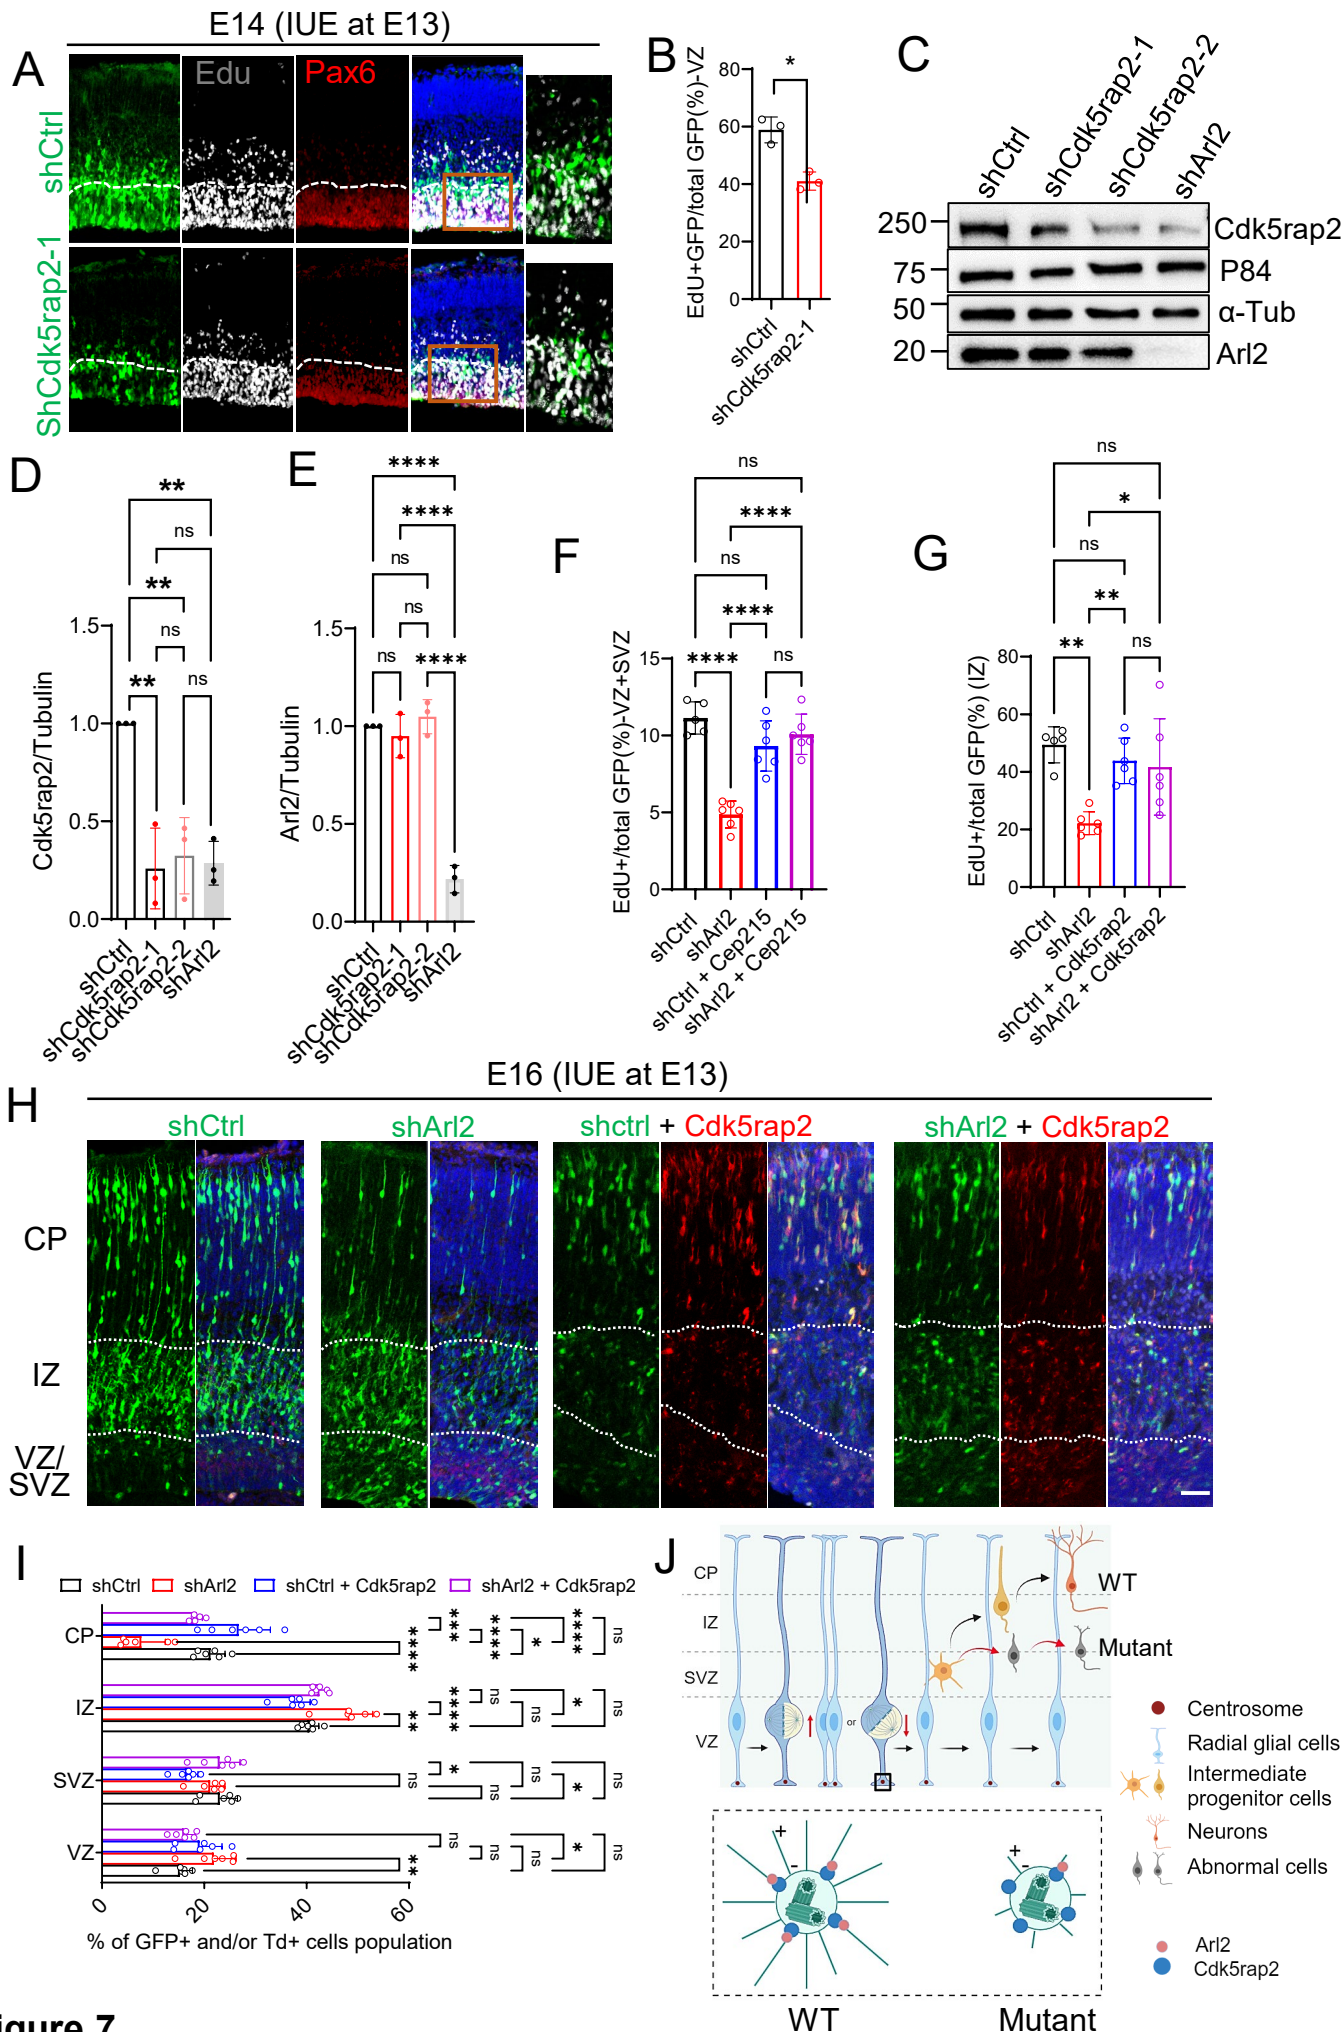

**Figure 7**



**Fig. 7 Arl2 functions upstream of Cdk5rap2 in regulating neuronal cell migration and proliferation in the developing cortex**

(A) Brain slices from shCtrl (scrambled control) and shCdk5rap2 (Cdk5rap2 shRNA) groups at E14, one day after IUE, were labelled with EdU and GFP. (B) Bar graphs showing reduced EdU incorporation upon Cdk5rap2 knockdown ( $41.05 \pm 3.16\%$  in shCdk5rap2 vs  $58.89 \pm 4.50\%$  in shCtrl). The values represent the mean  $\pm$  s.d.. Student's t-test in C,  $n = 3$ . Differences were considered significant at  $*p < 0.05$ . (C) Western blotting analysis of mNPC protein extracts of control (H1-shctrl-GFP), Cdk5rap2 KD (H1-shCdk5rap2-GFP) and Arl2 KD with lentivirus (pPurGreen) infection in 48 h culture. Blots were probed with anti-Cdk5rap2 and anti-Arl2 antibody,  $\alpha$ -Tubulin and p84 as loading control. (D) Bar graphs representing Cdk5rap2 protein levels upon Arl2 knockdown (shCdk5rap2-1 =  $0.26 \pm 0.21$  and shCdk5rap2-2 =  $0.32 \pm 0.20$ ; shArl2 =  $0.29 \pm 0.11$  normalized in shCtrl,  $n = 3$ ) in mNPCs. (E) Bar graphs representing Arl2 protein levels upon Cdk5rap2 knockdown (shCdk5rap2-1 =  $0.95 \pm 0.11$  and shCdk5rap2-2 =  $1.05 \pm 0.09$ ; shArl2 =  $0.22 \pm 0.07$  normalized in shCtrl,  $n = 3$ ) in mNPCs. (F) Bar graphs showing the total number of GFP+EdU+ double positive cells in VZ+SVZ by overexpression of Cdk5rap2 in Arl2 KD brains (Control =  $11.14 \pm 1.04\%$ , shArl2 =  $4.87 \pm 0.81\%$ , shCtrl + Cdk5rap2 =  $9.32 \pm 1.63\%$ , shArl2 + Cdk5rap2 =  $10.08 \pm 1.31\%$ ) (shCtrl,  $n = 5$  embryos; shArl2, shCtrl + shCdk5rap2, shArl2 + shCdk5rap2,  $n = 6$  embryos) 2 days after IUE. (G) Bar graphs showing the total number of GFP+EdU+ double positive cells in IZ by overexpression of Cdk5rap2 in Arl2 KD brains (Control =  $49.41 \pm 6.25\%$ , shArl2 =  $22.17 \pm 3.98\%$ , shCtrl + Cdk5rap2 =  $43.84 \pm 7.89\%$ , shArl2 + Cdk5rap2 =  $41.68 \pm 16.74\%$ ) (shCtrl,  $n = 5$  embryos; shArl2, shCtrl + shCdk5rap2, shArl2 + shCdk5rap2,  $n = 6$  embryos) 2 days after IUE. The values represent the mean  $\pm$  s.d.. One-Way ANOVA in D-H. Differences were considered significant at  $****p < 0.0001$ . (H) Brain slices from shCtrl, shArl2,

shCtrl + Cdk5rap2 and shArl2 + Cdk5rap2 groups at E16, three days after IUE, were labelled with GFP (shCtrl, shArl2, shCtrl + Cdk5rap2 and shArl2 + Cdk5rap2) and tdTomato (shCtrl + Cdk5rap2 and shArl2 + Cdk5rap2). (I) Bar graphs (images in H) representing GFP+ and/or Td+ cell population in the groups of control (VZ =  $15.22 \pm 2.47\%$ , SVZ =  $23.03 \pm 3.46\%$ , IZ =  $40.55 \pm 1.83\%$ , CP =  $21.22 \pm 2.82\%$ , n = 6 embryos), shArl2 (VZ =  $21.87 \pm 4.31\%$ , SVZ =  $21.14 \pm 2.87\%$ , IZ =  $48.45 \pm 4.47\%$ , CP =  $7.70 \pm 4.67\%$ , n = 6 embryos), shCtrl + Cdk5rap2 (VZ =  $19.08 \pm 4.38\%$ , SVZ =  $16.59 \pm 2.18\%$ , IZ =  $37.63 \pm 3.05\%$ , CP =  $26.70 \pm 6.21\%$ , n = 6 embryos) and shArl2 + Cdk5rap2 (VZ =  $16.07 \pm 2.15\%$ , SVZ =  $22.98 \pm 3.99\%$ , IZ =  $42.50 \pm 1.45\%$ , CP =  $18.45 \pm 1.51\%$ , n = 6 embryos). (J) Working model (made by BioRender): Arl2 plays a novel role in regulating the balance of asymmetric and symmetric divisions of mNSCs and their proliferation and differentiation. Arl2 is required for the proliferation, migration and differentiation of mouse forebrain NPCs *in vitro* and *in vivo* by regulating centrosome assembly and microtubule growth in NPCs. Arl2 physically associates and recruits Cdk5rap2 to the centrosomes to promote microtubule assembly in NPCs. Arl2 functions upstream of Cdk5rap2 in regulating NPC proliferation and migration during mouse cortical development. The values represent the mean  $\pm$  s.d.. Two-Way ANOVA with Multiple comparisons in I; Differences were considered significant at \* $p < 0.05$ , \*\* $p < 0.01$ , \*\*\* $p < 0.001$  and \*\*\*\* $p < 0.0001$ , ns = non-significance. Scale bar; A and H = 50  $\mu\text{m}$ .

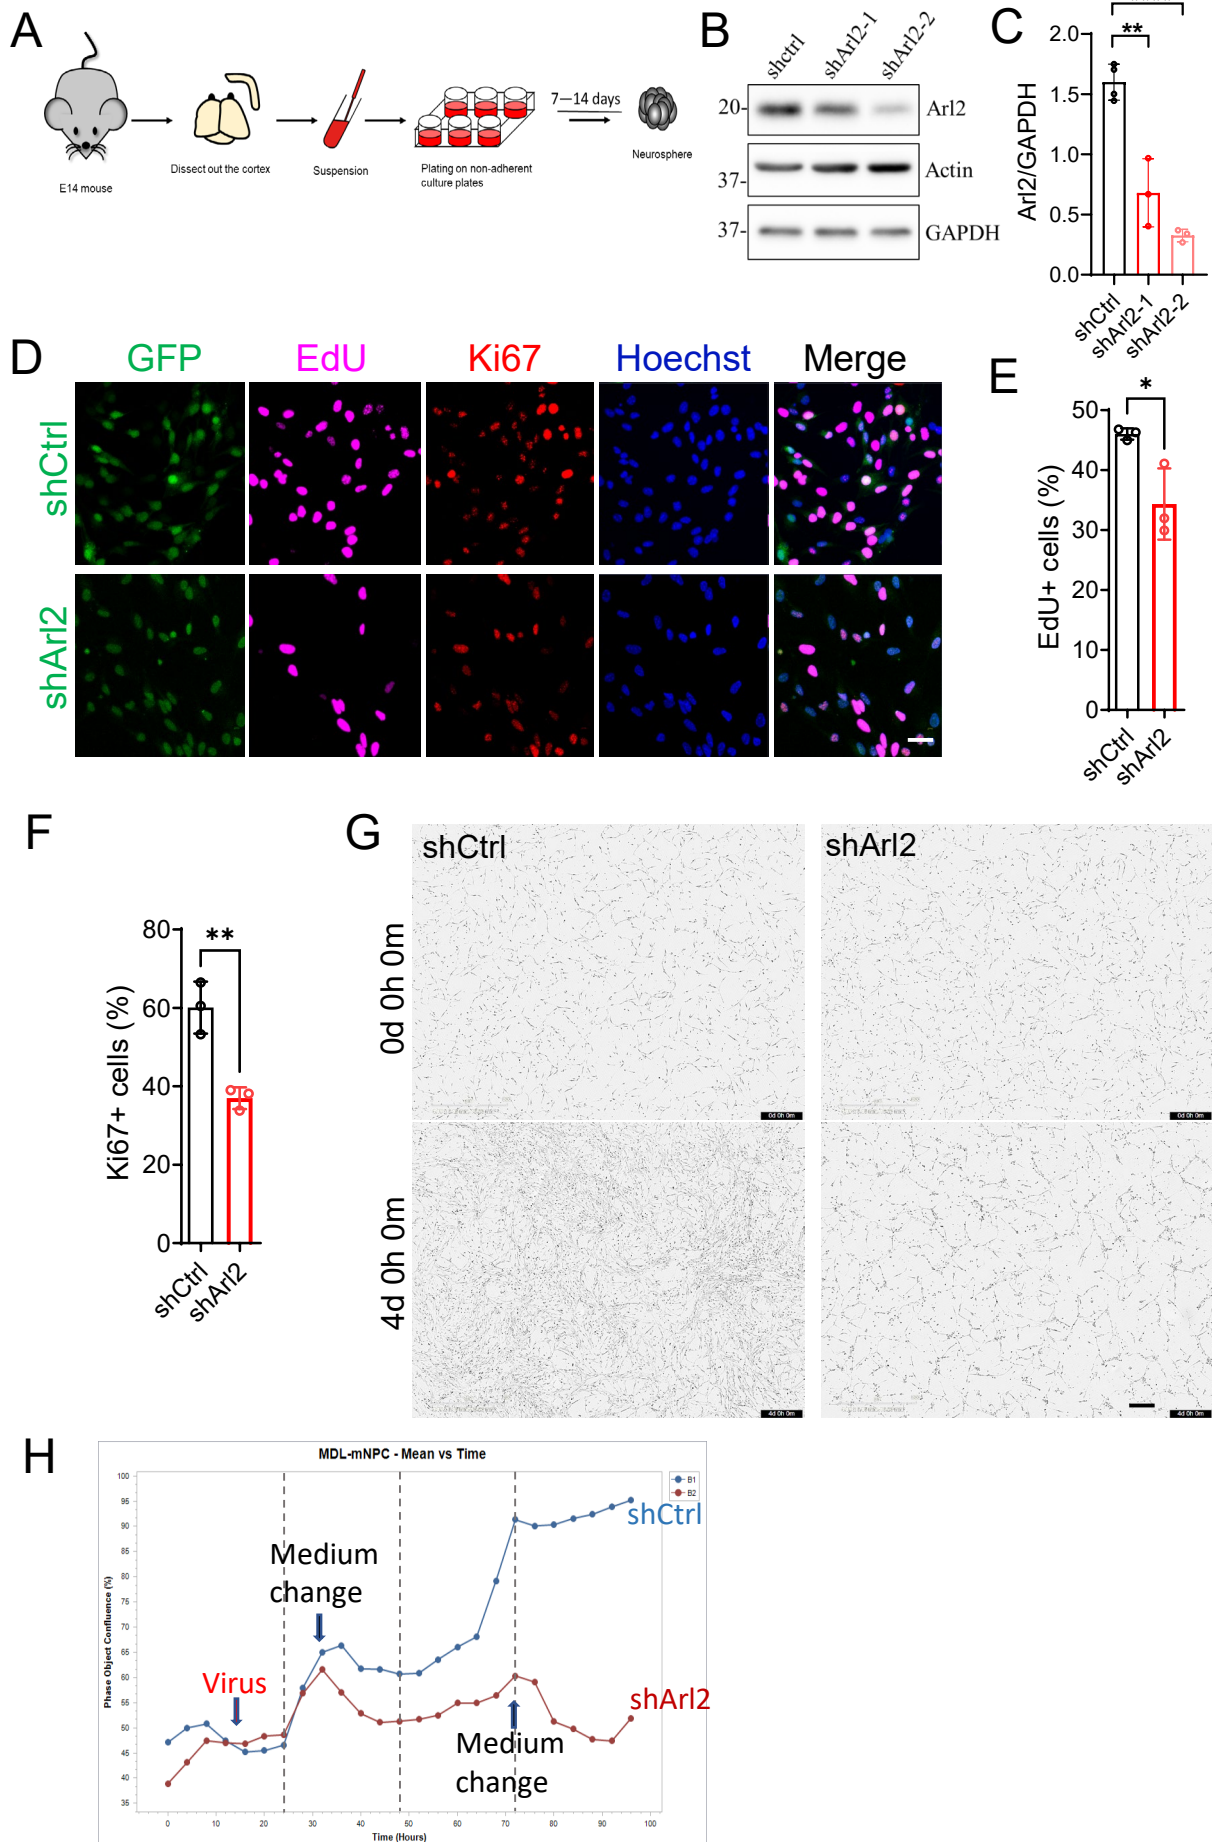

Supplementary Figure 1

### Supp Figure 1 Arl2 knockdown affects mouse neural progenitor cell proliferation *in vitro*

(A) Schematic representation of primary mouse neural progenitor cell (mNPC) culture from embryonic mice. (B) Western blotting analysis of mNPC protein extracts of control (H1-shctrl-GFP) and Arl2 knockdown (H1-shArl2-GFP) with lentivirus (pPurGreen) infection in 48 h culture. Blots were probed with anti-Arl2 antibody and anti-GAPDH antibody. Immunoblot showing the efficiency of Arl2 knockdown. (C) Bar graphs representing knockdown efficiency of Arl2 normalized to the internal control GAPDH ( $0.68 \pm 0.28$  in shArl2-1,  $0.33 \pm 0.05$  in shArl2-2 vs  $1.60 \pm 0.15$  in shctrl,  $n = 3$ ). (D) Immunostaining micrographs of mNPCs labelled for EdU and the proliferation marker Ki67. (E) Bar graphs showing reduced EdU incorporation upon Arl2 knockdown ( $34.35 \pm 5.95\%$  in shArl2 with 12 images vs  $46.03 \pm 0.95\%$  in shctrl with 14 images,  $n = 3$  batches). (F) Bar graphs showing decreased Ki67<sup>+</sup> cells in shArl2 group compared to the control ( $36.98 \pm 2.77\%$  in shArl2 with 12 images vs  $60.09 \pm 6.63\%$  in shCtrl with 14 images,  $n = 3$  batches). (G) Time series showing decreased cell proliferation upon Arl2 knockdown as compared to control. (H) Line graph representing the timeline of mNPC proliferation and showing the defects in cell proliferation in shArl2 group compared to the control. At least three sets of independent experiments were performed. The values represent the mean  $\pm$  s.d.. One-Way ANOVA in C. Student's t-test in E, F. Differences were considered significant at  $*p < 0.05$ ,  $**p < 0.01$  and  $***p < 0.0001$ . Scale bars; D = 30  $\mu\text{m}$ ; G = 250  $\mu\text{m}$ .

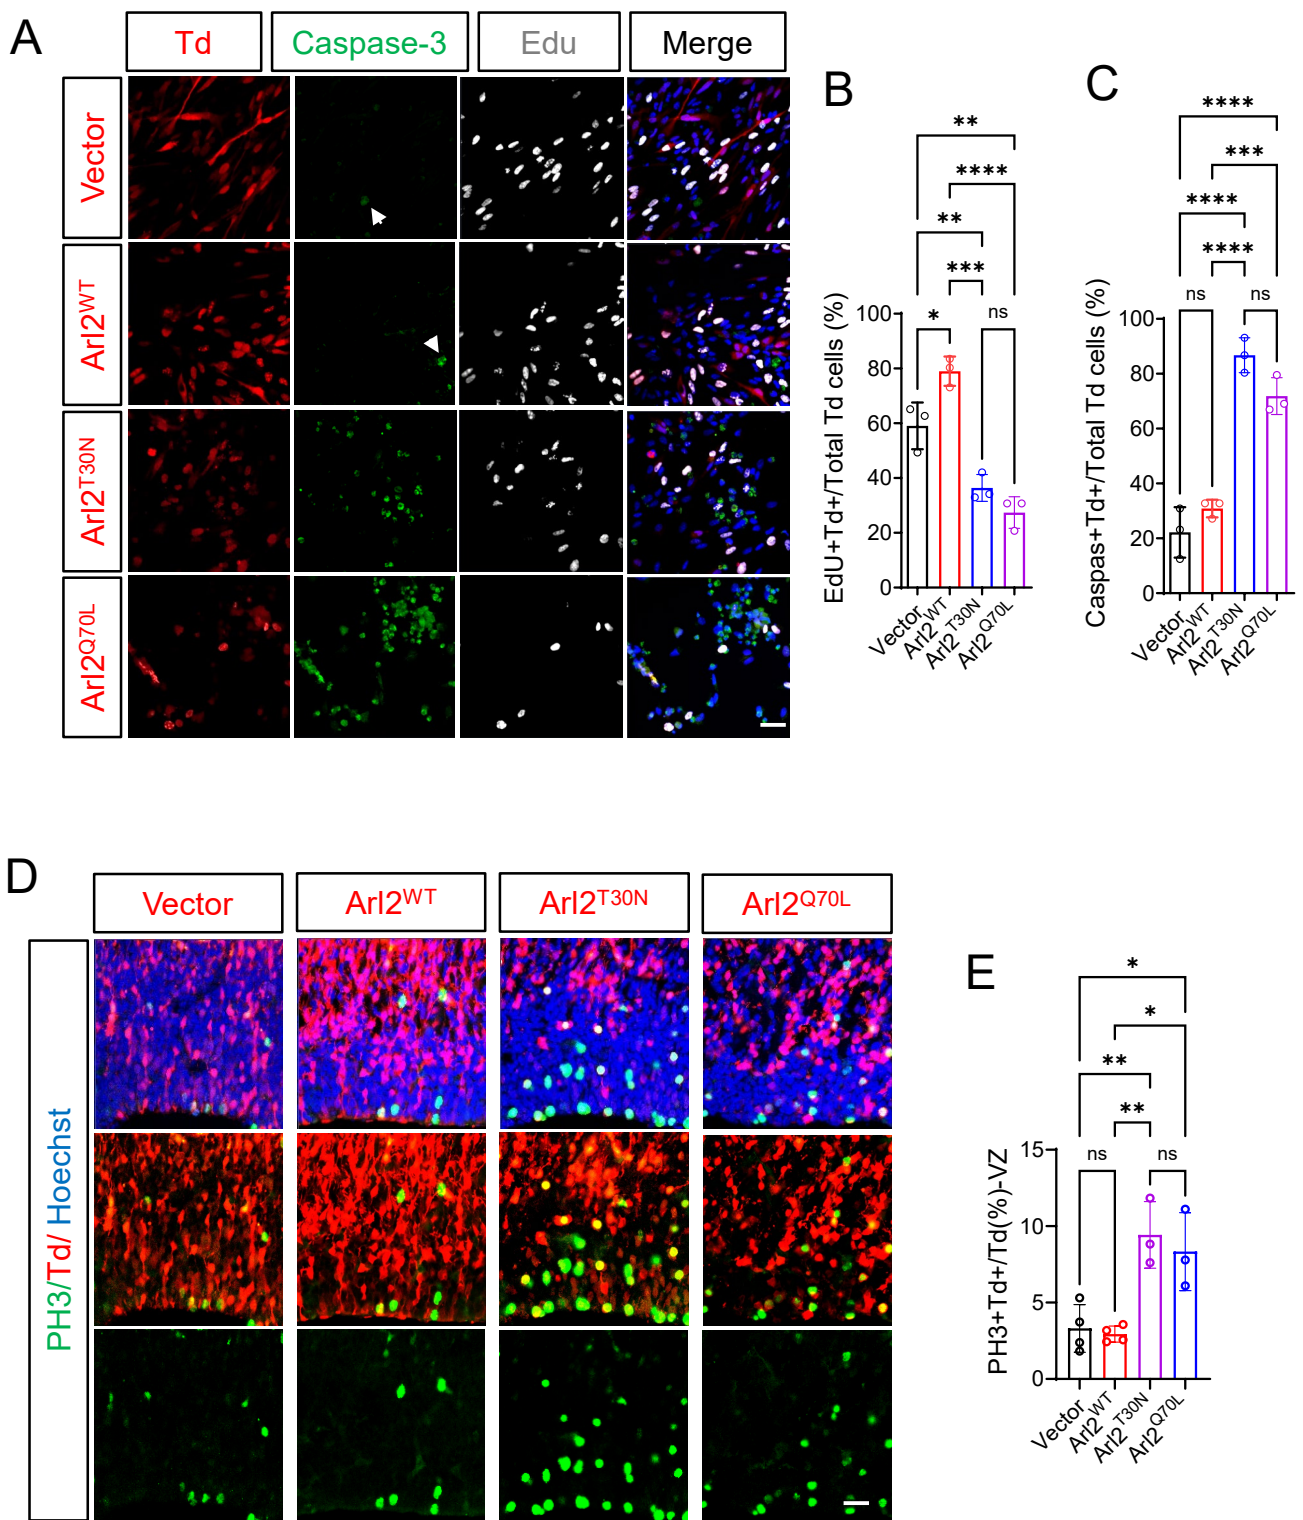

Supplementary Figure 2

## Supp Figure 2 Overexpression Arl2 and mutant affect mouse neural progenitor cell proliferation

(A) Immunostaining micrographs of mNPCs *in vitro* in Arl2<sup>WT</sup>, Arl2<sup>T30N</sup> and Arl2<sup>Q70L</sup> labelled with EdU and caspase-3. (B) Bar graphs showing the proportion of EdU+ cells in control (59.06 ± 8.52%), Arl2<sup>WT</sup> (79.01 ± 5.34%), Arl2<sup>T30N</sup> and Arl2<sup>Q70L</sup> (36.4 ± 4.93% and 27.4 ± 5.78%, respectively) (n = 3). (C) Bar graphs showing the proportion of caspase-3 + cells in control (22.18 ± 9.21%, n = 4), Arl2<sup>WT</sup> (30.89 ± 3.22%, n = 4), Arl2<sup>T30N</sup> and Arl2<sup>Q70L</sup> (86.76 ± 6.36% and 71.86 ± 6.74%, respectively) (n = 3). (D) Brain slices from Arl2<sup>WT</sup>, Arl2<sup>T30N</sup> and Arl2<sup>Q70L</sup>, at E15, two days after IUE, labelled for phospho-histone H3-positive (PH3+). (E) Bar graphs showing the proportion of PH3+ cells in control 3.31 ± 1.56%, n = 4; Arl2<sup>WT</sup> 2.94 ± 0.53%, n = 4; Arl2<sup>T30N</sup> 8.33 ± 2.55% and Arl2<sup>Q70L</sup> 9.43 ± 2.18%, n = 3, in two day after IUE in VZ of brain sections. The values represent the mean ± s.d.. One-Way ANOVA with Multiple comparisons in B, C and E. Differences were considered significant at \*p<0.05, \*\*p<0.01, \*\*\*p<0.001 and \*\*\*\*p<0.0001, ns = non-significance. Scale bars; A and D = 50 µm.

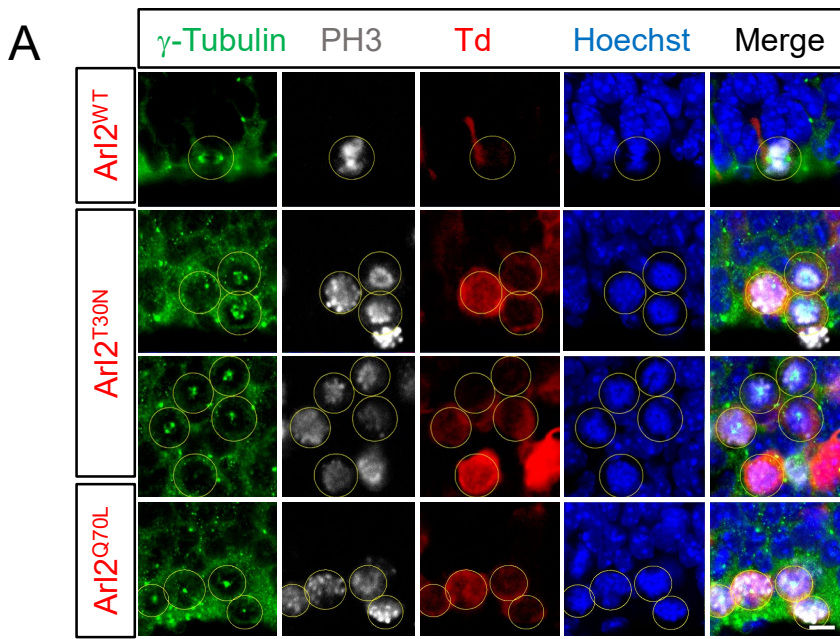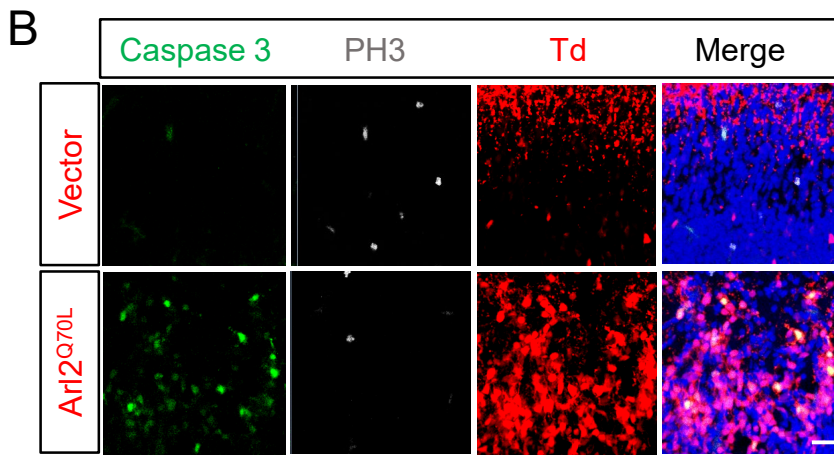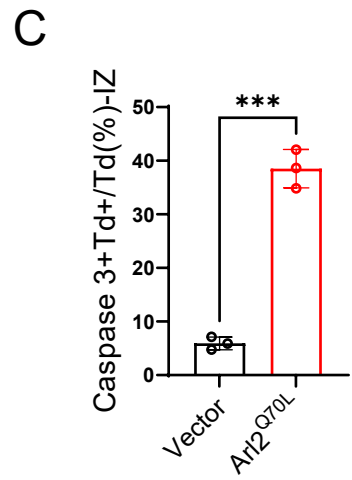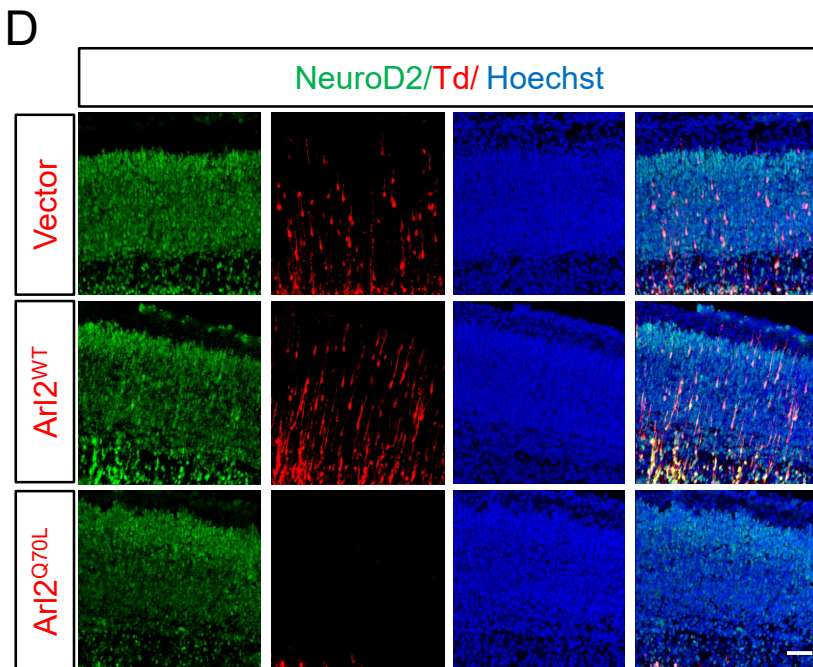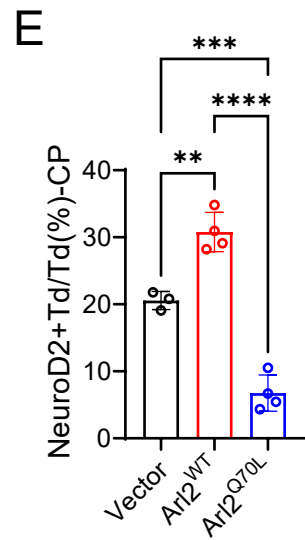

### Supp Figure 3 Overexpression Arl2 mutant affect mouse neural progenitor cell proliferation.

(A) Immunostaining micrographs of mNPCs *in vitro* in Arl2<sup>WT</sup>, Arl2<sup>T30N</sup> and Arl2<sup>Q70L</sup> labelled for phospho-histone H3-positive (PH3+). (B) Brain slices from Arl2<sup>WT</sup> and Arl2<sup>Q70L</sup>, at E16, three days after IUE, labelled for caspase-3, tdTomato and PH3. (C) Bar graph showing the caspase-3 staining and the proportion of caspase-3 + cells in the IZ in Arl2<sup>Q70L</sup> ( $38.52 \pm 3.60\%$ ) as compared to control ( $5.93 \pm 1.19\%$ ) (n = 3) in 3 days after IUE. (D) Brain slices from Vector control, Arl2<sup>WT</sup> and Arl2<sup>Q70L</sup>, at E16, three days after IUE, labelled for Neuro-D, tdTomato and Hoechst. (E) Bar graph showing the expression of NeuroD2, a neuronal marker found in immature neurons, in Arl2<sup>WT</sup> ( $30.77 \pm 2.93\%$ ) but dramatically reduced in Arl2<sup>Q70L</sup> ( $6.75 \pm 2.69\%$ ) 3 days after IUE as compared to control ( $20.57 \pm 1.36\%$ ). The values represent the mean  $\pm$  s.d.. One-Way ANOVA in E. Student's t-test in C, Differences were considered significant at \*\*p<0.01, \*\*\*p<0.001 and \*\*\*\*p<0.0001, ns = non-significance. Scale bars; A = 5  $\mu$ m; B = 50  $\mu$ m; C = 80  $\mu$ m.



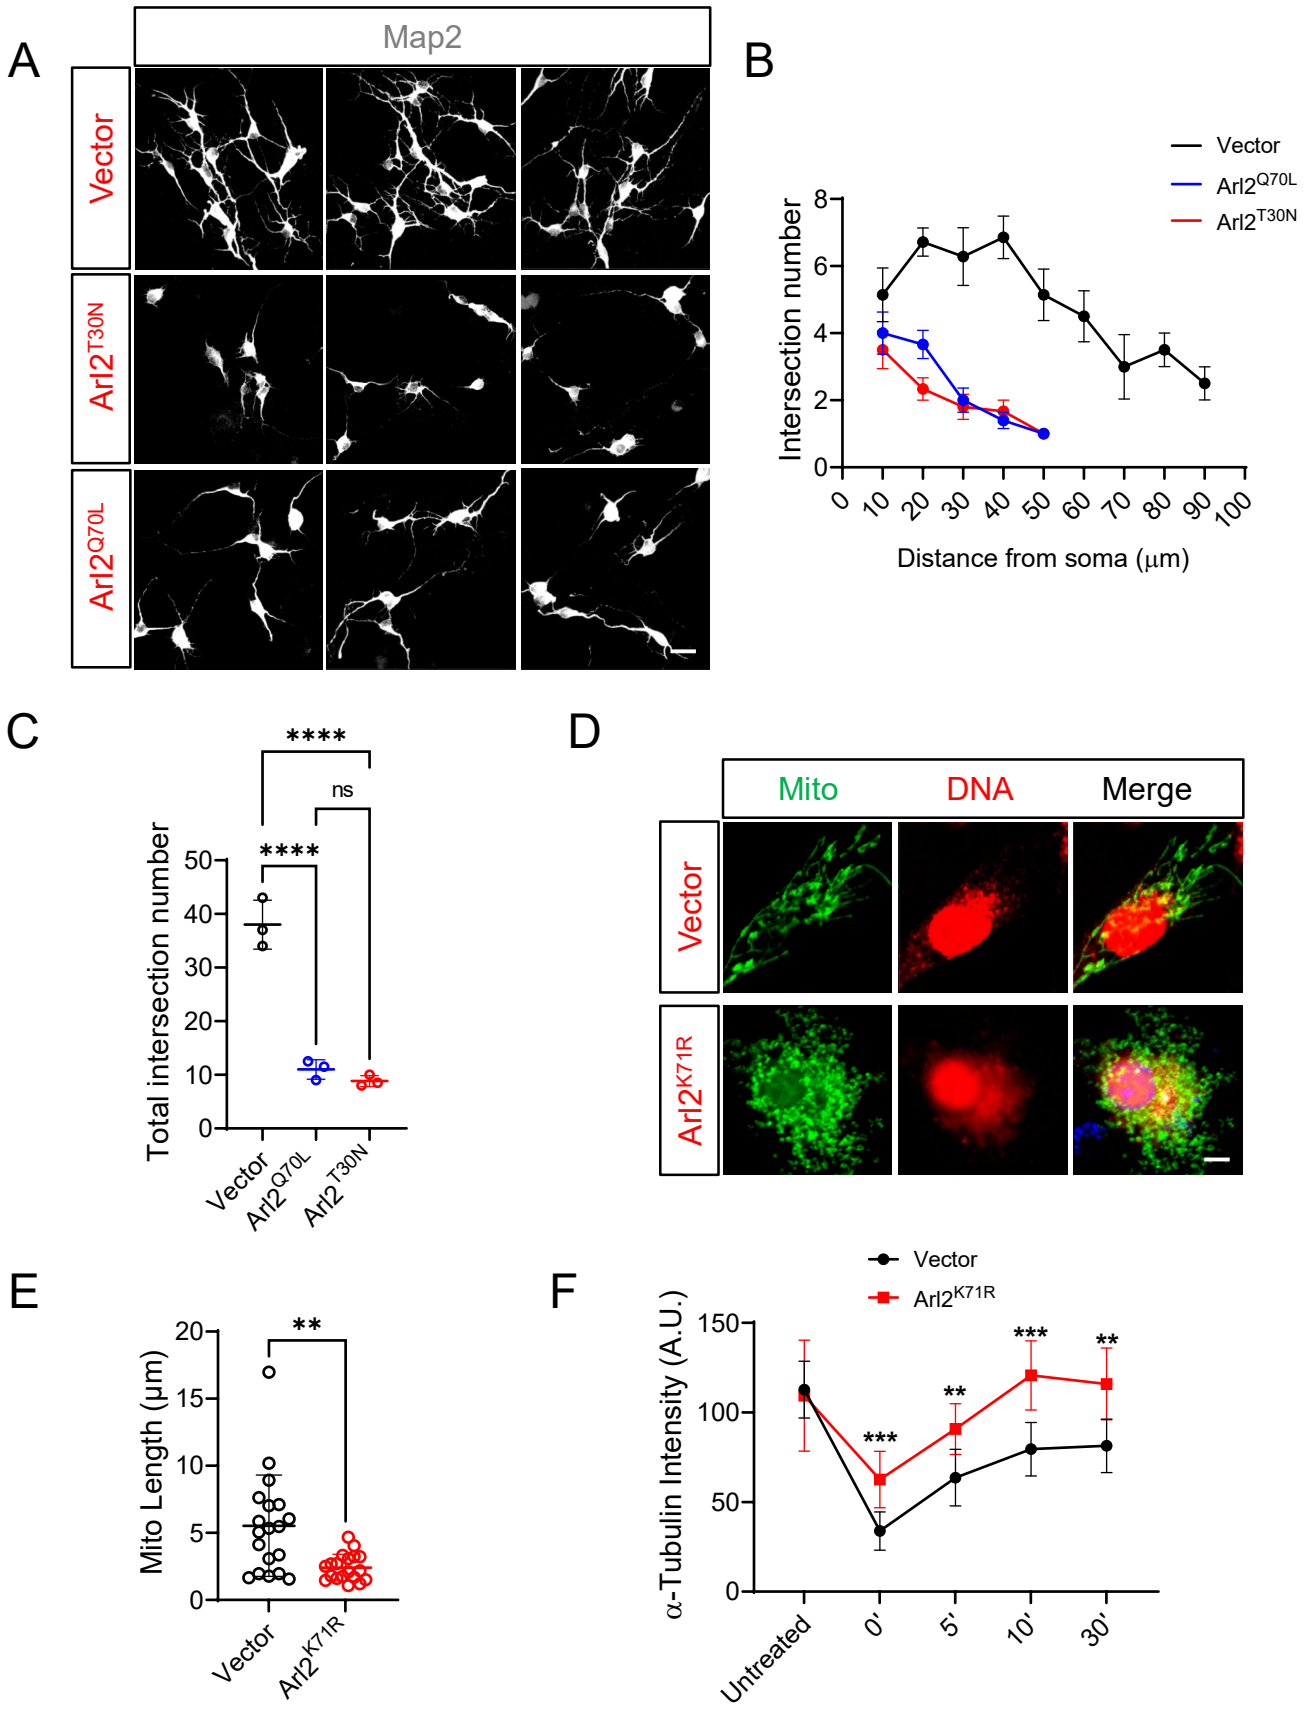

Supplementary Figure 4

**Supp Figure 4 Arl2-K71R mutant causes mitochondrial fragmentation and has no effect on microtubule regrowth**

(A) Immunostaining micrographs showing decreased neural complexities of in primary cortical neurons (labeled by Map2) *in vitro* in overexpression of Arl2<sup>T30N</sup> and Arl2<sup>Q70L</sup> mutants. (B) Scholl's analysis showing the distance from soma and the intersection number reduced in the ARL2<sup>T30N</sup> and ARL2<sup>Q70L</sup> mutants as compared to the control. (C) Scholl's analysis showing the total intersection number as measured and significantly reduced in Arl2<sup>Q71L</sup> ( $11 \pm 1.80$ ) and Arl2<sup>T30N</sup> ( $8.83 \pm 1.04$ ) as compared to control ( $38 \pm 4.58$ ). (D) Immunostaining micrographs of mNPCs in Vector control and mouse Arl2<sup>K71R</sup> overexpression. Arl2<sup>K71R</sup> overexpression showed fragmented mitochondria with shortened mitochondrial length as compared to control in mNPCs *in vitro*. (E) Graph representing mitochondrial length ( $2.41 \pm 0.99 \mu\text{m}$ ) in Arl2<sup>K71R</sup> mutant as compared to control ( $5.53 \pm 3.78 \mu\text{m}$ ). (F) Line graph of microtubule regrowth assay representing  $\alpha$ -tubulin intensity in overexpression of Arl2<sup>K71R</sup> mutant group (Untreated =  $109.41 \pm 30.92$ , 0 min =  $62.56 \pm 15.69$ , 5 min =  $90.77 \pm 14.18$ , 10 min =  $120.69 \pm 19.26$ , and 30 min =  $115.93 \pm 20.06$ ) as compared to the control (Untreated =  $112.73 \pm 15.82$ , 0 min =  $33.82 \pm 10.65$ , 5 min =  $63.64 \pm 15.80$ , 10 min =  $79.52 \pm 14.88$ , and 30 min =  $81.37 \pm 14.90$ ) (Unit = A.U.) in mNPCs *in vitro*. The values represent the mean  $\pm$  s.d.. One-Way ANOVA in C, Student's t-test in E, Multiple t-test in F, n = 3. Differences were considered significant at \*p<0.05, \*\*p<0.01, \*\*\*p<0.001 and \*\*\*\*p<0.0001, ns = non-significance. Scale bars; A = 20  $\mu\text{m}$ ; D = 5  $\mu\text{m}$ .

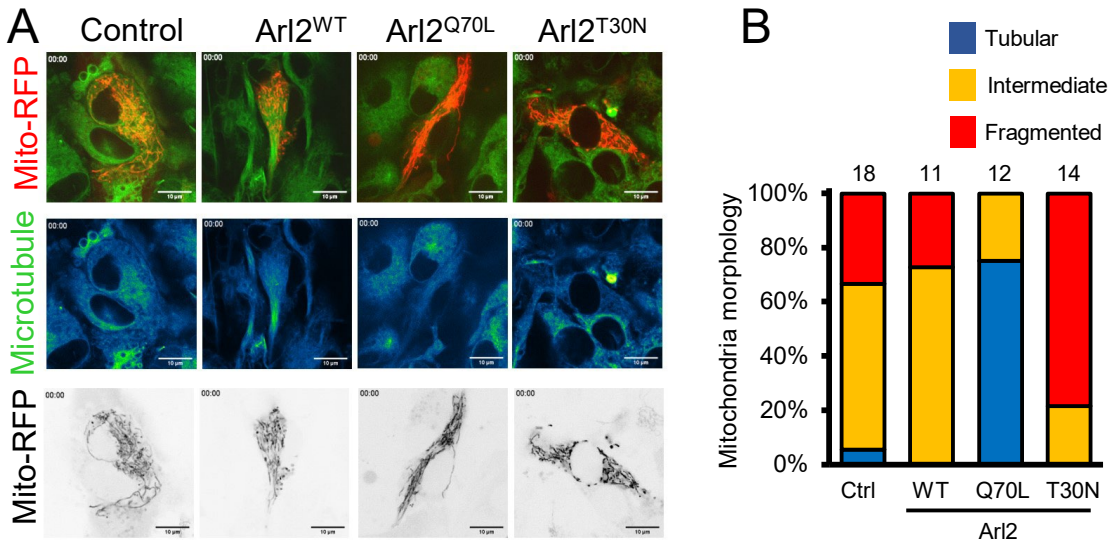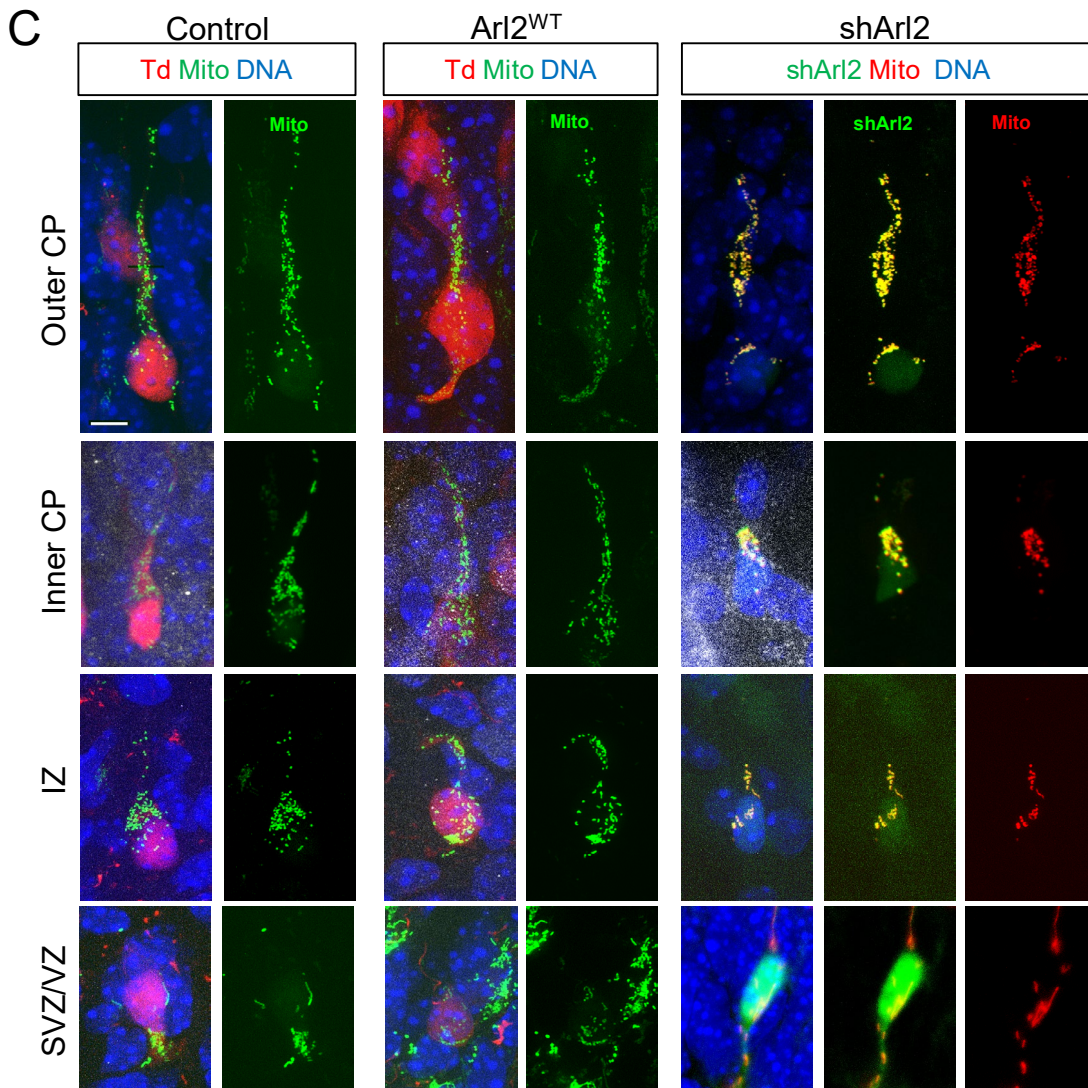

**Supp Figure 5 Mitochondrial morphology remained unchanged upon shArl2 KD or overexpression of Arl2 in mouse brains**

(A) Live imaging micrograph of mitochondria (Mito-RFP, Plasmid #51013, Addgene) and microtubule (Viafluor-488 live cell microtubule staining kit (Biotium, #70062) dynamics in control, Arl2<sup>Q70L</sup>-overexpressing, or Arl2<sup>T30N</sup>-overexpressing mNPCs. (B) Bar graph shows qualifications of mitochondria morphology in various genotypes in A. (C) Brain slices from shCtrl, Arl2<sup>WT</sup> and shArl2 groups at E17, four days after IUE, were labelled with GFP, TdTomato, Mito and DNA. Scale bars; A and C = 10  $\mu$ m.

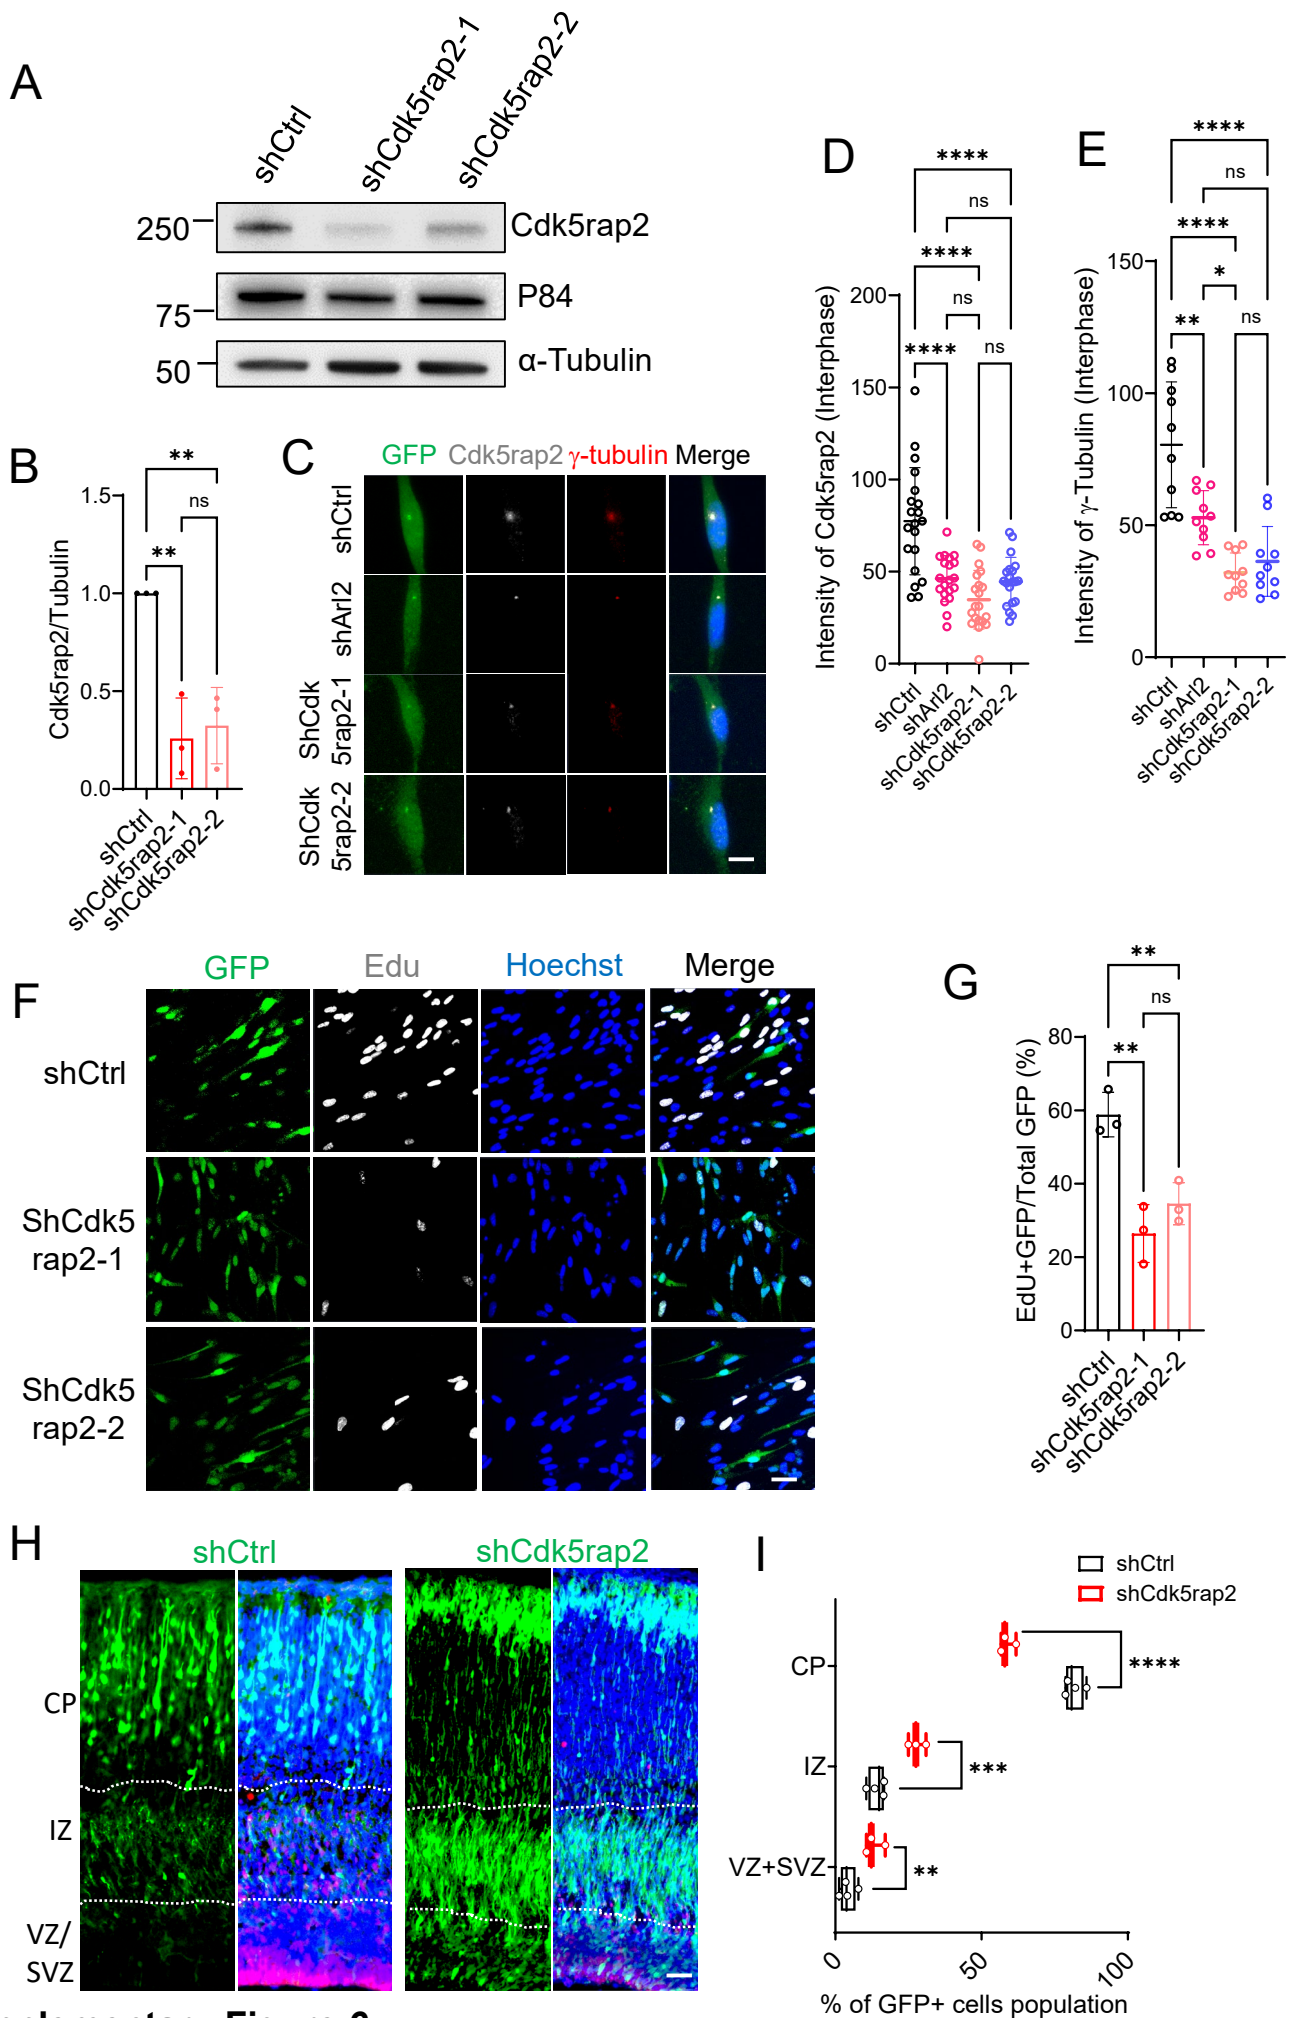

Supplementary Figure 6

## Supp Figure 6 The phenotypes of Cdk5rap2 knockdown are similar with Arl2 KD

(A) Western blotting analysis of mNPC protein extracts of control (H1-shctrl-GFP) and Cdk5rap2 knockdown (H1-shCdk5rap2-GFP) with lentivirus (pPurGreen) infection in 48 h culture. Blots were probed with anti-Cdk5rap2 antibody and anti-GAPDH antibody. (B) Bar graphs representing knockdown efficiency of Cdk5rap2 normalized to the internal control GAPDH ( $0.26 \pm 0.21$  in shCdk5rap2-1,  $0.32 \pm 0.20$  in shCdk5rap2-2 normalized in shCtrl,  $n = 3$ ). (C) Immunostaining micrographs in shCtrl, shArl2, shCdk5rap2-1 and shCdk5rap2-2 in interphase mNPCs were labelled with  $\gamma$ -tubulin, Cdk5rap2 and Hoechst (DNA). (D) Quantification graph showing Cdk5rap2 intensity at interphase of mNPCs ( $46.14 \pm 12.51$ ) upon Arl2 knockdown and (shCdk5rap2-1 =  $34.73 \pm 15.93$ ; shCdk5rap2-2 =  $44.53 \pm 13.16$ ) upon Cdk5rap2 knockdown as compared to shCtrl ( $77.37 \pm 29.09$ ,  $n = 3$  batches with 20 cells). (E) Quantification graph showing  $\gamma$ -tubulin intensity at interphase of mNPCs ( $52.83 \pm 10.22$ ) upon Arl2 knockdown and (shCdk5rap2-1 =  $32.02 \pm 7.45$ ; shCdk5rap2-2 =  $36.29 \pm 13.21$ ) upon Cdk5rap2 knockdown as compared to shCtrl ( $80.47 \pm 23.81$ ,  $n = 3$  batches with 10 cells). The values represent the mean  $\pm$  s.d.. One-Way ANOVA in D and E. Differences were considered significant at \* $p < 0.05$ , \*\* $p < 0.01$  and \*\*\*\* $p < 0.0001$ , ns = non-significance. (F) Immunostaining micrographs in shCtrl, shCdk5rap2-1 and shCdk5rap2-2 in mNPCs were labelled with EdU and DNA. (G) Bar graphs showing reduced EdU incorporation upon Cdk5rap2 KD in mNPCs. The values represent the mean  $\pm$  s.d. (shCtrl =  $58.84 \pm 6.06\%$ ; shCdk5rap2-1 =  $26.42 \pm 7.89\%$ ; shCdk5rap2-2 =  $34.58 \pm 5.72\%$ ,  $n = 3$ ). (H) Brain slices from shCtrl, shCdk5rap2 groups at E17, four days after IUE, were labelled with GFP. (I) Box plots representing GFP<sup>+</sup> cells for (H) in CP (shctrl:  $81.51 \pm 3.26\%$ , shCdk5rap2:  $58.81 \pm 2.66\%$ ), IZ (shctrl:  $14.29 \pm 2.87\%$ , shCdk5rap2:  $27.85 \pm 3.02\%$ ), and SVZ + VZ (shctrl:  $4.20 \pm 2.73\%$ , shCdk5rap2:  $13.34 \pm 3.31\%$ ) (shCtrl:  $n = 4$ , shCdk5rap2:  $n = 3$ ) showing defects in

neuronal migration to CP upon Cdk5rap2 Knockdown compared to the control. The values represent the mean  $\pm$  s.d.. One-Way ANOVA in B, D, E and G. Multiple unpaired t tests in I. Differences were considered significant at \*\* $p < 0.01$ , \*\*\* $p < 0.001$  and \*\*\*\* $p < 0.0001$ . ns = non-significance. Scale bars; C = 5  $\mu\text{m}$ ; F = 50  $\mu\text{m}$ ; H = 80  $\mu\text{m}$ .

### **Movie S1. Mouse NPCs proliferation in shCtrl by Incucyte in Supp Fig1G**

Time-lapse imaging to track the proliferation of mNPCs by Incucyte in control group for 4 days.

Time scale: day: hour: minute. Scale bar: 1.10 mm. (AVI)

### **Movie S2. Mouse NPCs proliferation in shArl2 by Incucyte in Supp Fig1G**

Time-lapse imaging to track the proliferation of mNPCs by Incucyte in Arl2 KD group for 4 days.

Time scale: day: hour: minute. Scale bar: 1.1 mm. (AVI)

### **Movie S3. Arl2-KD with EB3-Td in mNPCs in Fig3D**

Time-lapse imaging to track the growing ends of microtubules by using the plus-end microtubule binding protein EB3 tagged with Tdtomato (Td) in mNPCs in both shCtrl and shArl2 groups. Time scale: minute: second. Scale bar: 10  $\mu$ m. (AVI)

### **Movie S4. Arl2-OE in mNPCs for mitotic duration in Fig4H**

Live imaging of mNPCs in vitro using the Viafluor-488 live cell microtubule staining kit (Biotium, #70062) in mNPCs overexpressing Arl2<sup>WT</sup>, Arl2<sup>Q70L</sup> and Arl2<sup>T30N</sup>. Time scale: hour: minute. Scale bar: 10  $\mu$ m. (AVI)

### **Movie S5. Arl2-OE with Mitochondria dynamics in mNPCs in Supp Fig5A**

Time-lapse imaging showing the mitochondrial morphology and microtubules in the overexpression of ARL2<sup>Q70L</sup> and ARL2<sup>T30N</sup> mutants. Time scale: minute: second. Scale bar: 10  $\mu$ m. (AVI)

### **Movie S6. Arl2-OE with EB3-GFP in mNPCs in Fig5C**



Time-lapse imaging to track the EB3 tagged with GFP in mNPCs in overexpression of Arl2<sup>WT</sup>, Arl2<sup>Q70L</sup> and Arl2<sup>T30N</sup>. Time scale: minute: second. Scale bar: 10  $\mu$ m. (AVI)
